# Supplementary material for: Metabolic regulation of RNA methylation by the m6A-reader IGF2BP3
Source: PubMed Central journal article supplement — bioRxiv. 2024 Nov 3:2024.10.31.621399. Preprint. [Version 1] doi: 10.1101/2024.10.31.621399 (PMC11565949; doi:10.1101/2024.10.31.621399), 2024-11-03

# Supplementary Figure 1

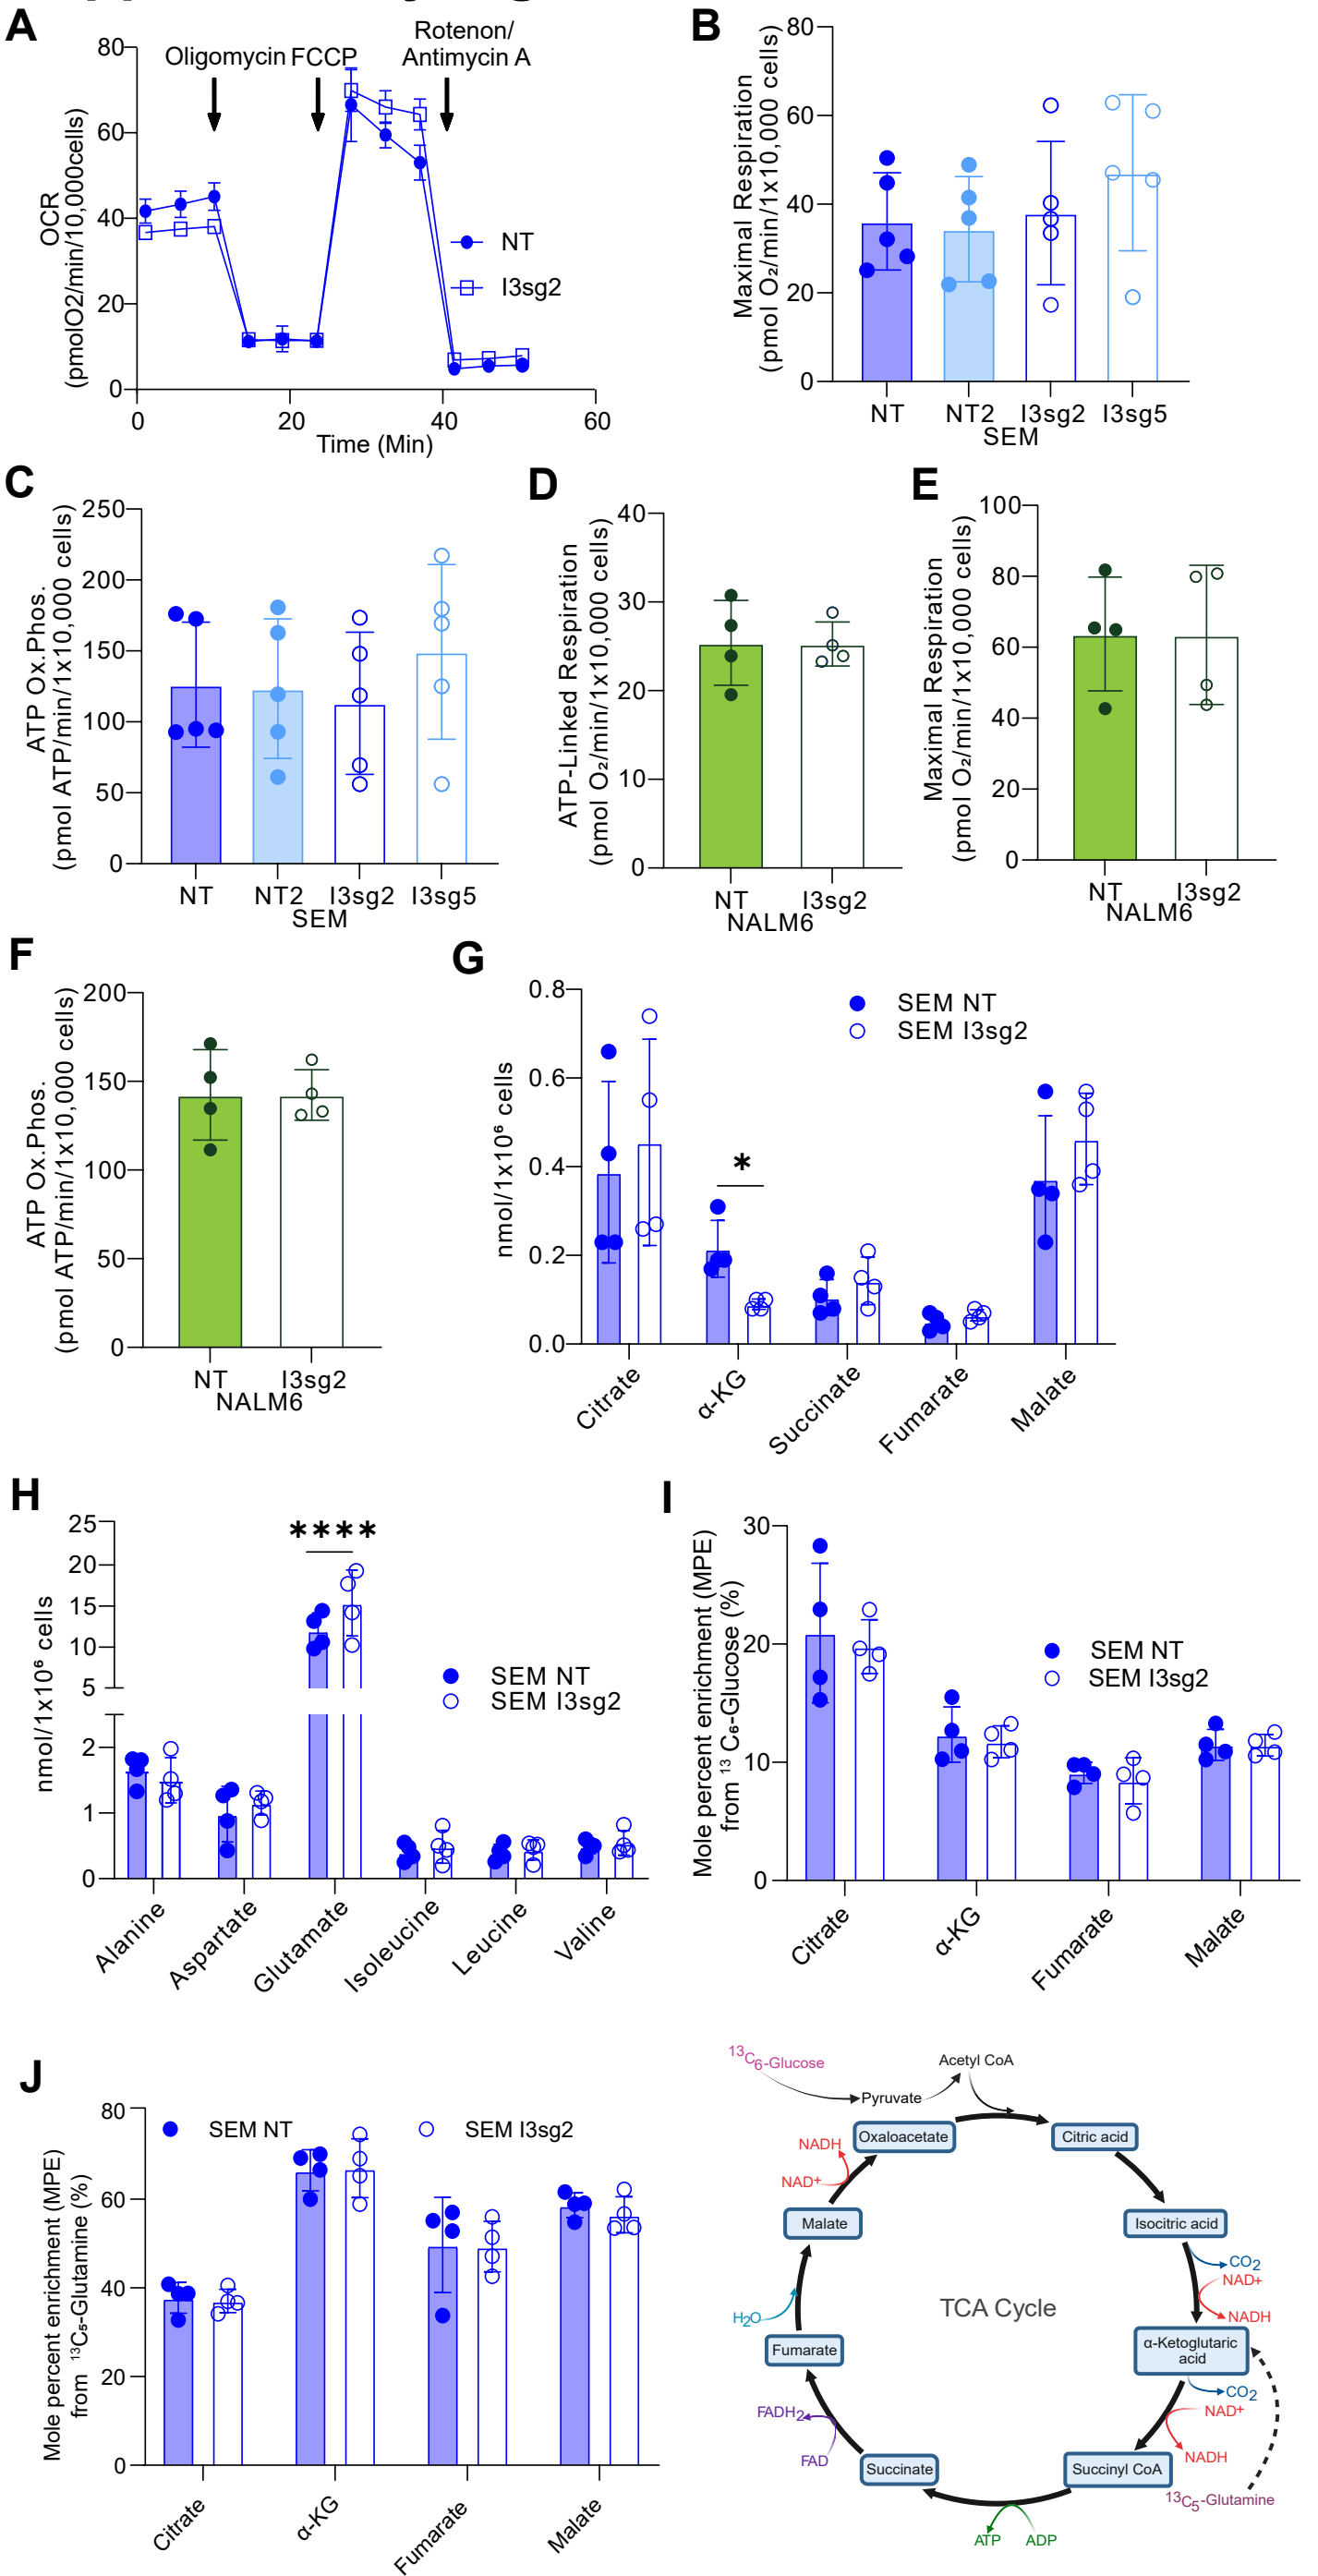

# Supplementary Figure 2

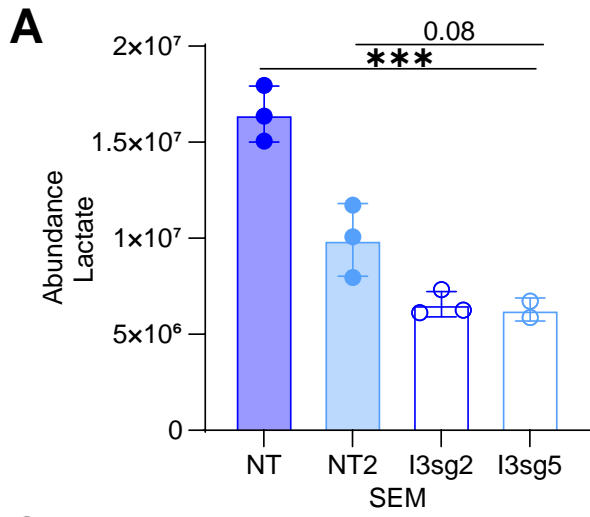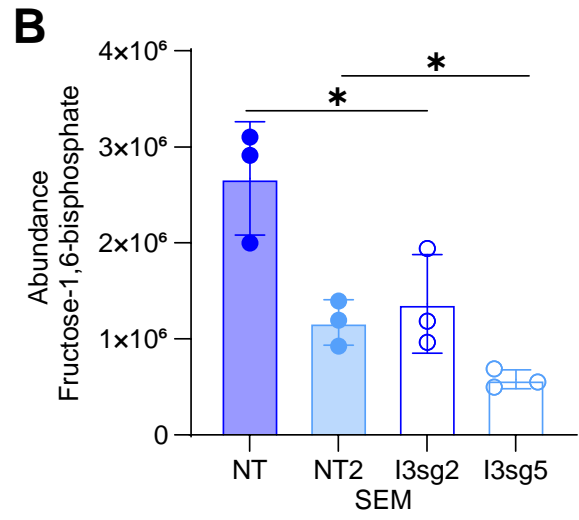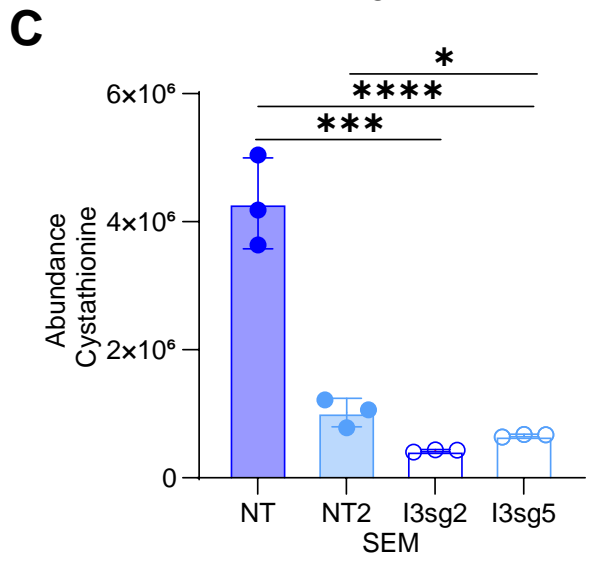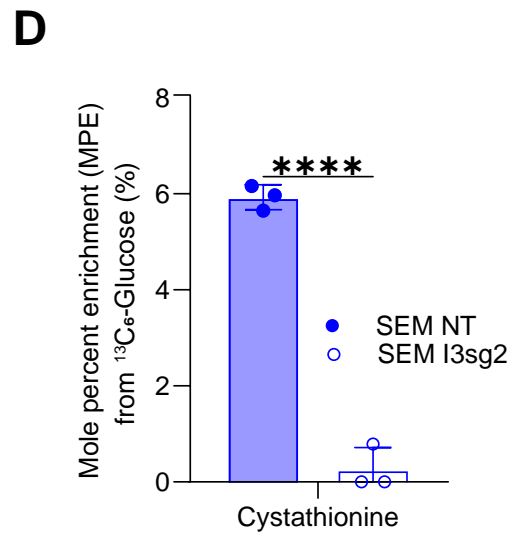

# Supplementary Figure 3

**A**

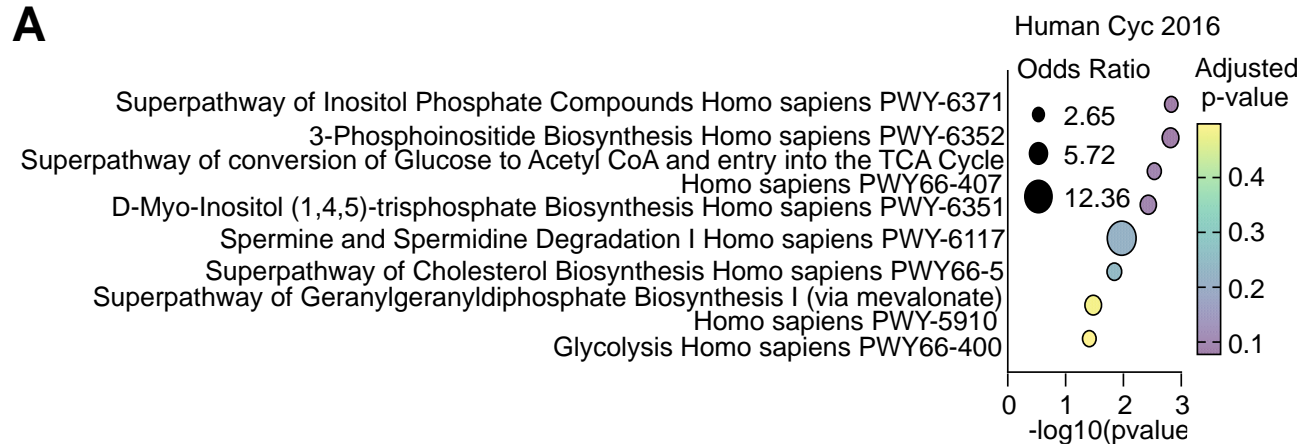

**B**

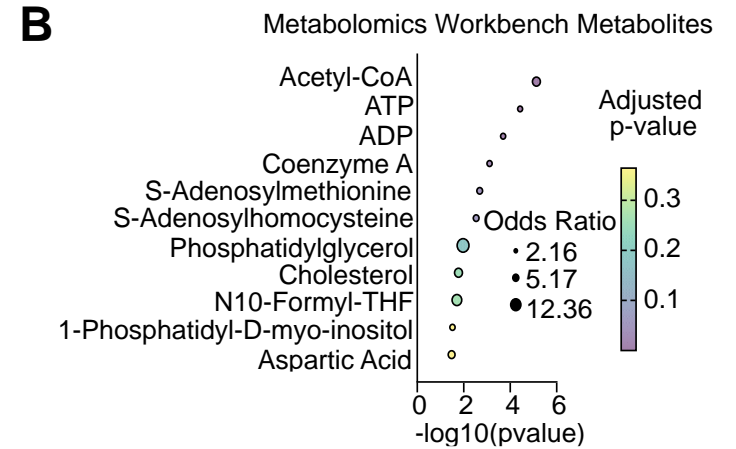

**C**

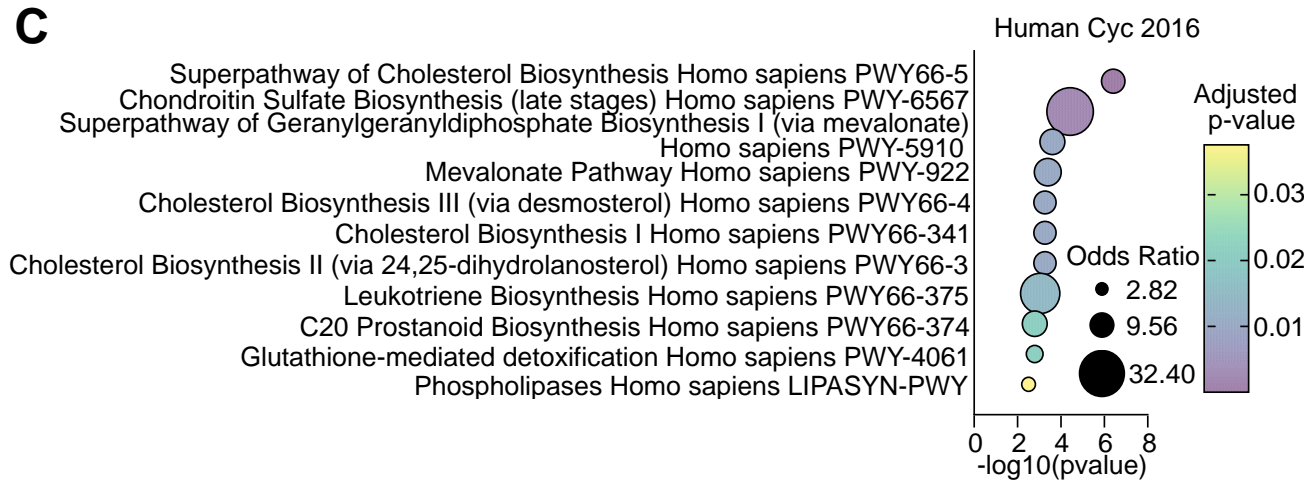

**D**

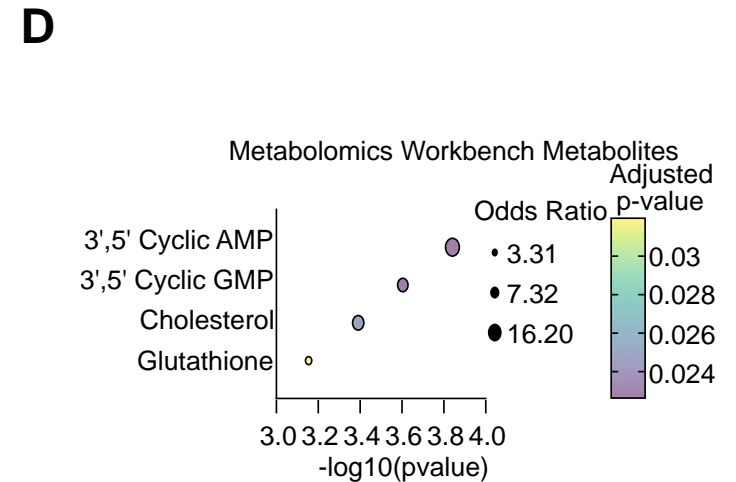

**E**

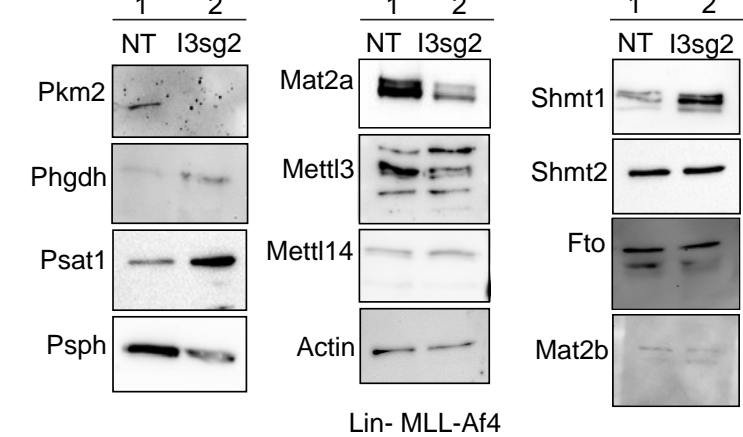

**F**

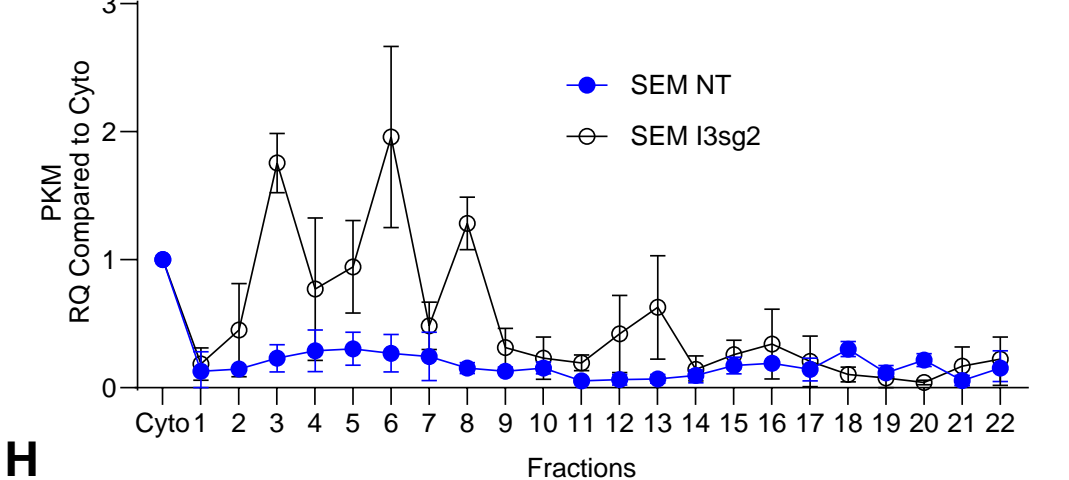

**G**

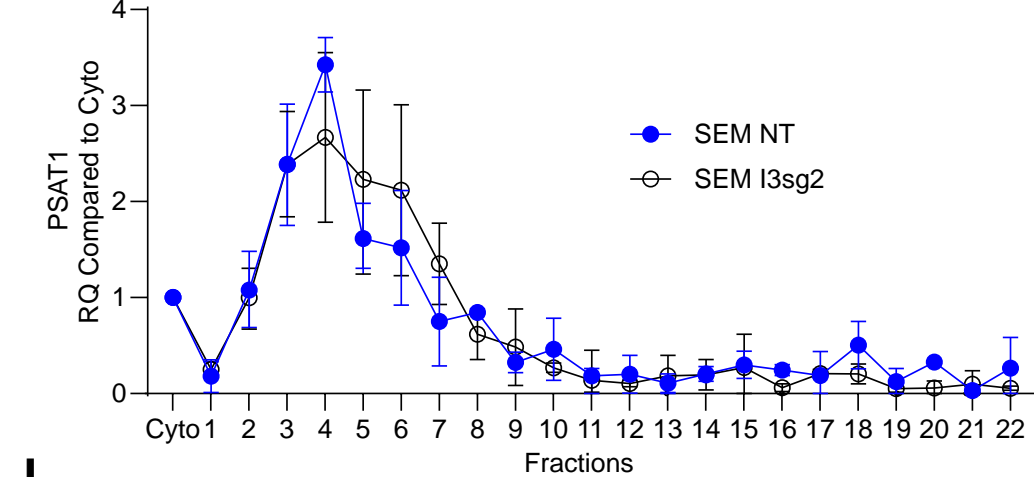

**H**

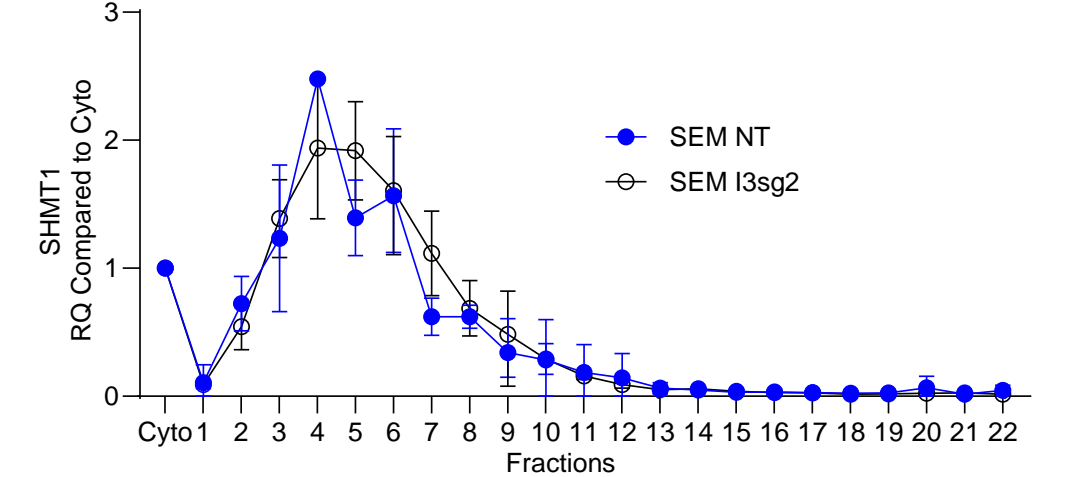

**I**

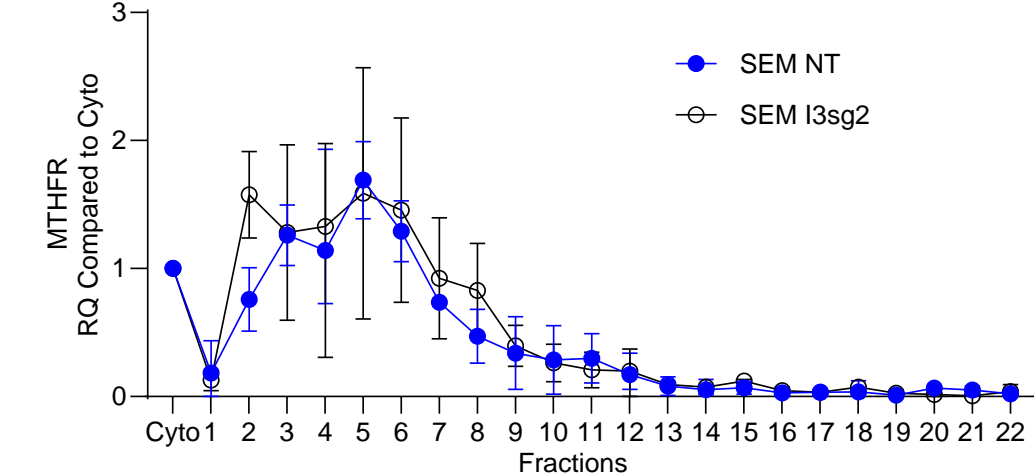

# Supplementary Figure 4

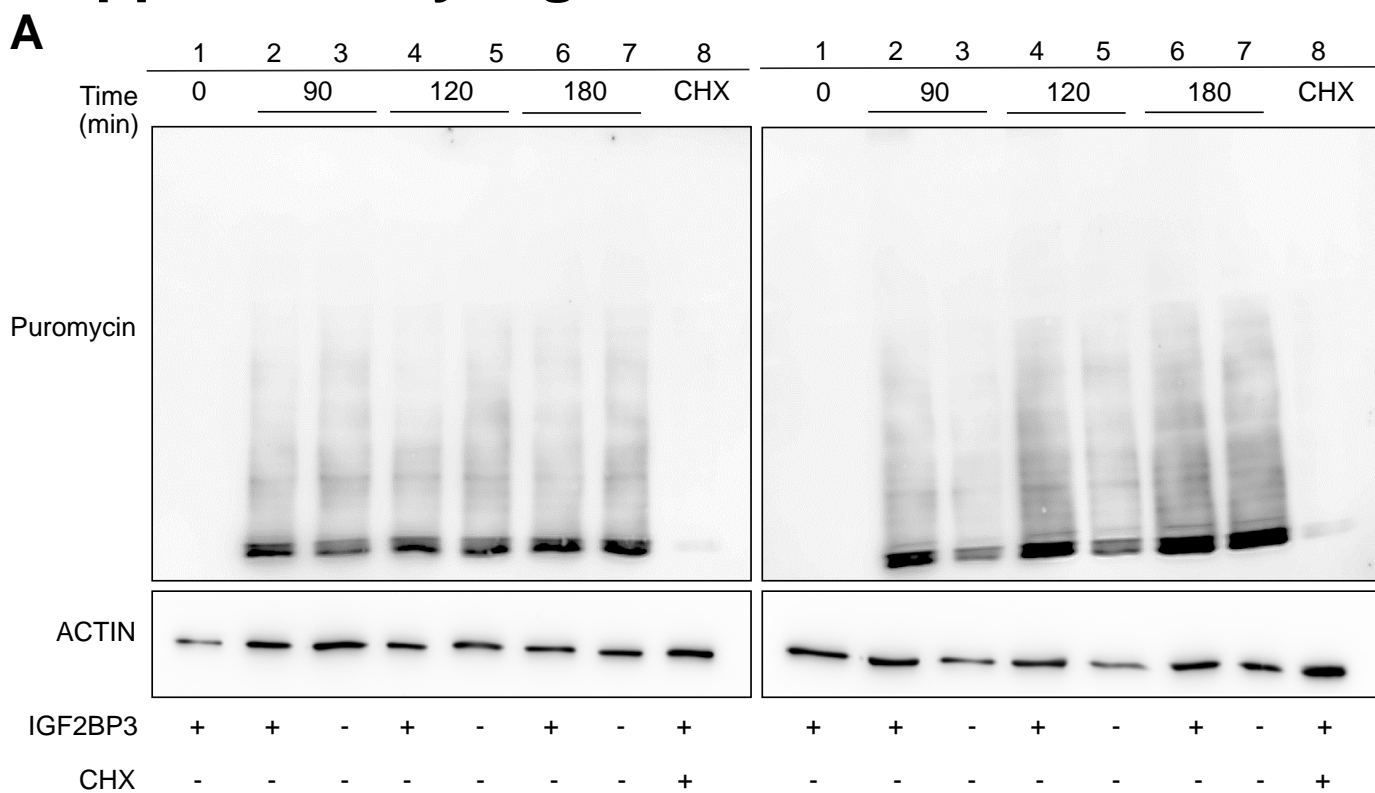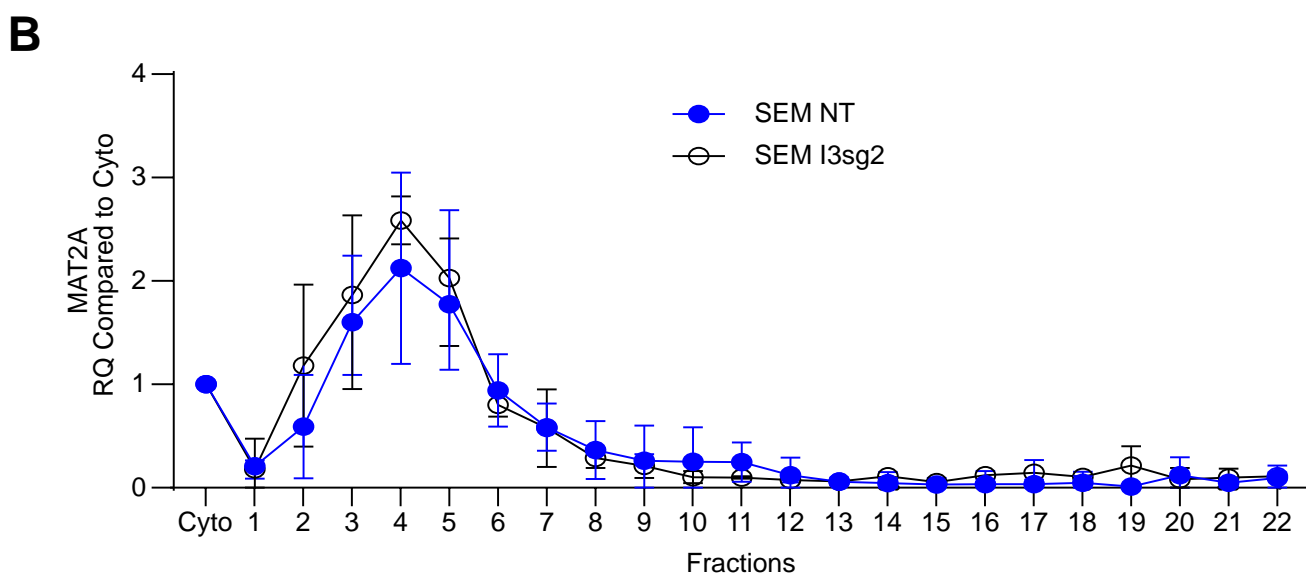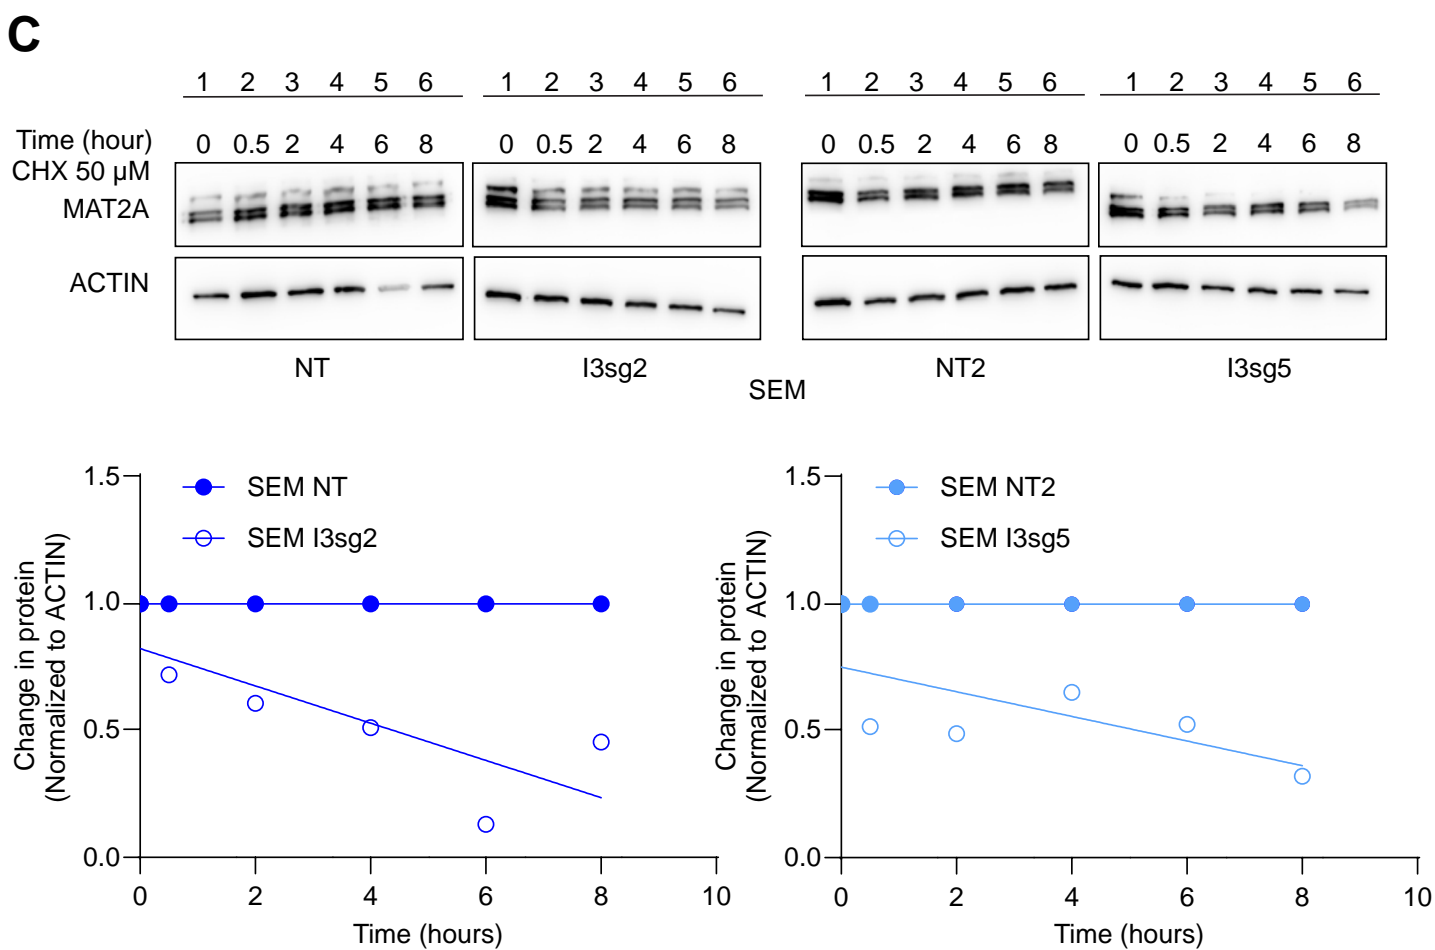

# Supplementary Figure 5

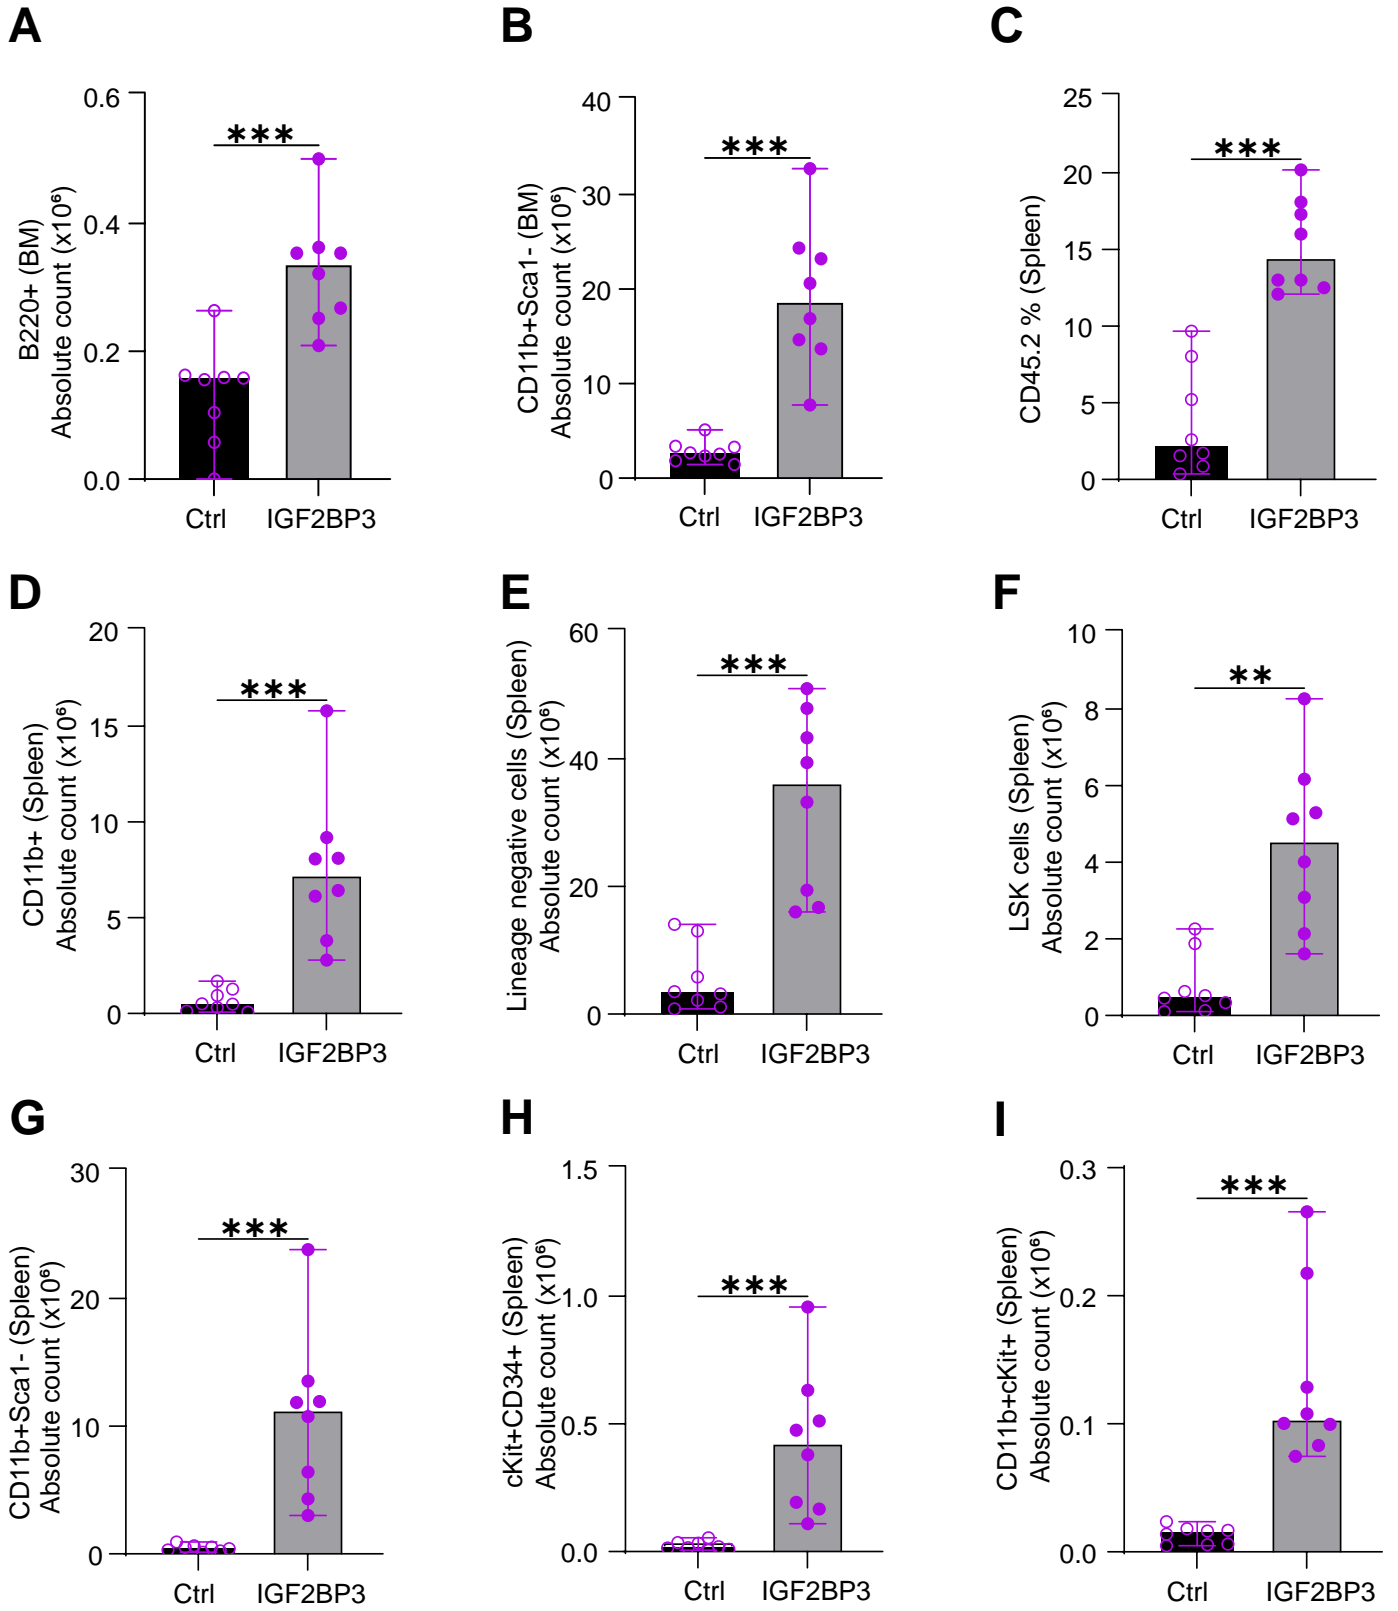

Supplement: media-4.pdf [file media-4.pdf]
