# Supplementary material for: Metabolic regulation of RNA methylation by the m6A-reader IGF2BP3
Source: PubMed Central journal article supplement — bioRxiv. 2024 Nov 3:2024.10.31.621399. Preprint. [Version 1] doi: 10.1101/2024.10.31.621399 (PMC11565949; doi:10.1101/2024.10.31.621399), 2024-11-03
Supplement: media-1.pdf [file media-1.pdf]

| Name          | KEGG.ID | Condition | Av          | Std         | CV          | Abundance    |             |             |             |     | Sig         | Av2         | denom       | Norm_Av     | Norm_Std |
|---------------|---------|-----------|-------------|-------------|-------------|--------------|-------------|-------------|-------------|-----|-------------|-------------|-------------|-------------|----------|
|               |         |           |             |             |             | Exp001       | Exp002      | Exp003      | ANOVA       |     |             |             |             |             |          |
| 2-HG          | C02630  | NT        | 2859093.575 | 504035.2637 | 0.176291979 | 3397034.376  | 2397726.922 | 2782519.428 | 0.010276591 | *   | 2859093.575 | 1472383.027 | 1.941813728 | 0.342326184 |          |
| 2-HG          | C02630  | I3sg2     | 1472383.027 | 149725.2701 | 0.101689076 | 1328818.62   | 1627589.461 | 1460741     | 0.010276591 | *   | 1472383.027 | 1472383.027 | 1           | 0.101689076 |          |
| 5-Oxoprolin   | C01879  | NT        | 18863038.67 | 779789.2118 | 0.041339533 | 18164844.8   | 19704543.16 | 18719728.05 | 0.000262781 | *** | 18863038.67 | 12510231.2  | 1.507808957 | 0.062332118 |          |
| 5-Oxoprolin   | C01879  | I3sg2     | 12510231.2  | 459601.7737 | 0.036738072 | 12862811.41  | 12677451.21 | 11990341    | 0.000262781 | *** | 12510231.2  | 12510231.2  | 1           | 0.036738072 |          |
| Aconitate     | C00417  | NT        | 721821.5876 | 92815.00153 | 0.128584408 | 723441.2934  | 813816.1361 | 628207.3333 | 0.002131325 | **  | 721821.5876 | 342258.8069 | 2.108993467 | 0.271183676 |          |
| Aconitate     | C00417  | I3sg2     | 342258.8069 | 8631.109144 | 0.025218078 | 338252.5729  | 336358.7848 | 352165      | 0.002131325 | **  | 342258.8069 | 342258.8069 | 1           | 0.025218078 |          |
| ADP/ATP       | NA      | NT        | 0.323362593 | 0.075073275 | 0.232164377 | 0.240170398  | 0.343856782 | 0.3860606   | 0.029523822 | *   | 0.323362593 | 0.323362593 | 1           | 0.232164377 |          |
| ADP/ATP       | NA      | I3sg2     | 0.596193324 | 0.12119501  | 0.203281394 | 0.735189085  | 0.512611257 | 0.540779632 | 0.029523822 | *   | 0.596193324 | 0.323362593 | 1.843730032 | 0.37479601  |          |
| Ala           | C00041  | NT        | 38355759.67 | 2461590.506 | 0.064177588 | 37997701.18  | 40976770.36 | 36092807.46 | 0.000181364 | *** | 38355759.67 | 14346365.02 | 2.673552472 | 0.171582872 |          |
| Ala           | C00041  | I3sg2     | 14346365.02 | 1904125.407 | 0.132725287 | 14905739.1   | 15908149.96 | 12225206    | 0.000181364 | *** | 14346365.02 | 14346365.02 | 1           | 0.132725287 |          |
| AMP/ATP       | NA      | NT        | 0.13773589  | 0.069453305 | 0.504249874 | 0.103621127  | 0.091937096 | 0.217649448 | 0.005794947 | **  | 0.13773589  | 0.13773589  | 1           | 0.504249874 |          |
| AMP/ATP       | NA      | I3sg2     | 0.366865806 | 0.02513092  | 0.068501669 | 0.395884483  | 0.352335404 | 0.35237753  | 0.005794947 | **  | 0.366865806 | 0.13773589  | 2.663545462 | 0.182457311 |          |
| Arg-Succ      | C03406  | NT        | 180405.7208 | 44737.43405 | 0.247982347 | 232000.0307  | 156835.3106 | 152381.8211 | 0.034126665 | *   | 180405.7208 | 97023.80907 | 1.859396395 | 0.461097482 |          |
| Arg-Succ      | C03406  | I3sg2     | 97023.80907 | 9220.625882 | 0.095034672 | 107517.3796  | 93337.04758 | 90217       | 0.034126665 | *   | 97023.80907 | 97023.80907 | 1           | 0.095034672 |          |
| Asn           | C00152  | NT        | 3638780.038 | 273384.0218 | 0.075130681 | 3945569.897  | 3547996.368 | 3420973.85  | 0.007091273 | **  | 3638780.038 | 2469811.942 | 1.473302471 | 0.110690218 |          |
| Asn           | C00152  | I3sg2     | 2469811.942 | 290256.4239 | 0.11752167  | 2189942.035  | 2769444.791 | 2450049     | 0.007091273 | **  | 2469811.942 | 2469811.942 | 1           | 0.11752167  |          |
| C             | D07769  | NT        | 26961.09829 | 17866.44755 | 0.662675065 | 14622.93965  | 18811.05302 | 47449.30221 | 0.008742237 | **  | 26961.09829 | 26961.09829 | 1           | 0.662675065 |          |
| C             | D07769  | I3sg2     | 114667.6104 | 26241.50935 | 0.228848489 | 94223.49258  | 144258.3385 | 105521      | 0.008742237 | **  | 114667.6104 | 26961.09829 | 4.253076382 | 0.973310103 |          |
| CDP-chole     | C00307  | NT        | 90801.01786 | 15304.95083 | 0.168554838 | 91780.08954  | 75030.03629 | 105592.9278 | 0.001094597 | **  | 90801.01786 | 90801.01786 | 1           | 0.168554838 |          |
| CDP-chole     | C00307  | I3sg2     | 258699.8323 | 31011.04404 | 0.119872687 | 239923.5896  | 294493.9072 | 241682      | 0.001094597 | **  | 258699.8323 | 90801.01786 | 2.849085157 | 0.341527494 |          |
| CDP-EIA       | C00570  | NT        | 1020971.933 | 121002.4052 | 0.118516877 | 989035.2091  | 919141.2446 | 1154739.346 | 0.049192741 | *   | 1020971.933 | 1020971.933 | 1           | 0.118516877 |          |
| CDP-EIA       | C00570  | I3sg2     | 1225912.478 | 38961.52869 | 0.031781656 | 1199734.576  | 1207314.856 | 1270688     | 0.049192741 | *   | 1225912.478 | 1020971.933 | 1.200730831 | 0.038616214 |          |
| Cit           | C00158  | NT        | 126509850.5 | 16754130.57 | 0.132433407 | 142747162.3  | 109282782.6 | 127499606.6 | 0.011703467 | **  | 126509850.5 | 81266230.7  | 1.566733337 | 0.2061635   |          |
| Cit           | C00158  | I3sg2     | 81266230.7  | 605731.556  | 0.074537376 | 75988180.48  | 7879974.62  | 79930537    | 0.011703467 | **  | 81266230.7  | 81266230.7  | 1           | 0.074537376 |          |
| CMP           | C00055  | NT        | 99197.01866 | 65194.82721 | 0.657225672 | 86453.35639  | 41314.94097 | 169822.7586 | 0.02355065  | **  | 99197.01866 | 99197.01866 | 1           | 0.657225672 |          |
| CMP           | C00055  | I3sg2     | 272383.2625 | 53317.80832 | 0.195745538 | 212123.1177  | 268480.9859 | 327545      | 0.02355065  | **  | 272383.2625 | 99197.01866 | 2.745881542 | 0.53749406  |          |
| Cystathionine | C02291  | NT        | 4287607.921 | 710307.4741 | 0.165665212 | 5044794.14   | 4182032.175 | 3635997.449 | 0.000709469 | *** | 4287607.921 | 425386.633  | 10.07931982 | 1.669792652 |          |
| Cystathionine | C02291  | I3sg2     | 425386.633  | 18135.04051 | 0.0426319   | 438599.9223  | 432848.9767 | 404711      | 0.000709469 | *** | 425386.633  | 425386.633  | 1           | 0.0426319   |          |
| Cytosine      | C00380  | NT        | 410561.4359 | 51520.30167 | 0.125487359 | 31200.0278   | 410404.0094 | 462160.2704 | 0.000205362 | **  | 410561.4359 | 16195.68674 | 25.35004797 | 3.181112508 |          |
| Cytosine      | C00380  | I3sg2     | 16195.68674 | 11379.82805 | 0.702645601 | 29329.40986  | 9988.650363 | 9269        | 0.000205362 | *** | 16195.68674 | 16195.68674 | 1           | 0.702645601 |          |
| F16BP         | C00354  | NT        | 2671150.925 | 589170.5546 | 0.220568051 | 1999656.987  | 2912325.907 | 3101469.882 | 0.044236093 | **  | 2671150.925 | 1936877.605 | 1.958497533 | 0.431981985 |          |
| F16BP         | C00354  | I3sg2     | 1363877.605 | 513438.4898 | 0.37645496  | 1943042.506  | 1184045.311 | 964545      | 0.044236093 | **  | 1363877.605 | 1363877.605 | 1           | 0.37645496  |          |
| Folate        | C00504  | NT        | 172610.8509 | 46141.23435 | 0.267313637 | 140941.5396  | 151340.1895 | 225550.8235 | 0.023071132 | *   | 172610.8509 | 172610.8509 | 1           | 0.267313637 |          |
| Folate        | C00504  | I3sg2     | 370707.5128 | 83861.04954 | 0.22621891  | 273945.1132  | 415855.4252 | 422322      | 0.023071132 | *   | 370707.5128 | 172610.8509 | 2.147648951 | 0.485838805 |          |
| GABA          | C00334  | NT        | 1717606.077 | 273922.8397 | 0.159479431 | 1980267.269  | 1433663.078 | 1738887.885 | 0.012556498 | **  | 1717606.077 | 1717606.077 | 1           | 0.159479431 |          |
| GABA          | C00334  | I3sg2     | 4455348.432 | 1065843.72  | 0.239227916 | 3227139.389  | 5001263.907 | 5137642     | 0.012556498 | **  | 4455348.432 | 1717606.077 | 2.593929127 | 0.620540259 |          |
| Glc           | C00031  | NT        | 8974296.029 | 2170922.97  | 0.241904542 | 6655628.935  | 10958701.53 | 9308557.627 | 0.004848842 | **  | 8974296.029 | 8974296.029 | 1           | 0.241904542 |          |
| Glc           | C00031  | I3sg2     | 19475786.93 | 2380910.005 | 0.122194746 | 18233737.61  | 17972731.19 | 22220892    | 0.004848842 | **  | 19475786.93 | 8974296.029 | 2.170174337 | 0.265303261 |          |
| GlcA          | C00257  | NT        | 703620.2939 | 151018.6014 | 0.214630821 | 831366.6361  | 742544.3602 | 536949.8855 | 0.010939104 | *   | 703620.2939 | 270793.1466 | 2.598368175 | 0.567689895 |          |
| GlcA          | C00257  | I3sg2     | 270793.1466 | 71557.7823  | 0.26425256  | 234335.8749  | 353237.5648 | 224806      | 0.010939104 | *   | 270793.1466 | 270793.1466 | 1           | 0.26425256  |          |
| GlcNAc-6P     | C00357  | NT        | 476299.7703 | 54697.72013 | 0.114838855 | 534641.0003  | 426175.2476 | 468083.0629 | 0.022694534 | *   | 476299.7703 | 276884.7344 | 1.720209571 | 0.197546897 |          |
| GlcNAc-6P     | C00357  | I3sg2     | 276884.7344 | 78722.76686 | 0.284316024 | 189879.5986  | 343187.0646 | 297587      | 0.022694534 | *   | 276884.7344 | 276884.7344 | 1           | 0.284316024 |          |
| GlucA         | C00191  | NT        | 185972.0512 | 26507.36618 | 0.142534139 | 208670.8493  | 156840.2484 | 192405.056  | 0.001188349 | **  | 185972.0512 | 52972.48466 | 3.510729247 | 0.50039877  |          |
| GlucA         | C00191  | I3sg2     | 52972.48466 | 8989.068793 | 0.169693169 | 61208.97614  | 54324.47784 | 43384       | 0.001188349 | **  | 52972.48466 | 52972.48466 | 1           | 0.169693169 |          |
| Gly           | C00037  | NT        | 14176813.3  | 450961.996  | 0.031809828 | 127198783.72 | 14697532.4  | 13914123.76 | 0.000633787 | **  | 14176813.3  | 9412258.545 | 1.506207381 | 0.047912198 |          |
| Gly           | C00037  | I3sg2     | 9412258.545 | 722037.384  | 0.076712447 | 8606369.704  | 9630147.931 | 10000258    | 0.000633787 | **  | 9412258.545 | 9412258.545 | 1           | 0.076712447 |          |
| GSH           | C00051  | NT        | 95036256.62 | 3630394.156 | 0.038200096 | 97036639.006 | 93983662.48 | 92048468.33 | 0.000126431 | *** | 95036256.62 | 61795077.87 | 1.537925995 | 0.058748921 |          |
| GSH           | C00051  | I3sg2     | 61795077.87 | 1507732.581 | 0.024398911 | 62842120.68  | 60066967.92 | 62476145    | 0.000126431 | *** | 61795077.87 | 61795077.87 | 1           | 0.024398911 |          |
| His           | C00135  | NT        | 36016885.1  | 5019268.83  | 0.139358771 | 41744607.8   | 33919805.4  | 32386242.1  | 0.016346722 | *   | 36016885.1  | 23768619.18 | 1.515312473 | 0.211172083 |          |
| His           | C00135  | I3sg2     | 23768619.18 | 1778295.24  | 0.074816935 | 21798644.78  | 24251874.75 | 25255338    | 0.016346722 | *   | 23768619.18 | 23768619.18 | 1           | 0.074816935 |          |
| HS2O3         | C00320  | NT        | 498005.4162 | 63378.68714 | 0.127265056 | 515024.8451  | 427854.7067 | 551136.6897 | 0.04195572  | *   | 498005.4162 | 498005.4162 | 1           | 0.127265056 |          |
| HS2O3         | C00320  | I3sg2     | 1052878.372 | 319524.6751 | 0.30347729  | 698154.4942  | 1142352.622 | 1318128     | 0.04195572  | *   | 1052878.372 | 498005.4162 | 2.114190605 | 0.641608835 |          |
| IMP           | C00130  | NT        | 165383.195  | 56795.29316 | 0.34341635  | 139149.8203  | 126446.4208 | 230553.3439 | 0.001606668 | **  | 165383.195  | 165383.195  | 1           | 0.34341635  |          |
| IMP           | C00130  | I3sg2     | 430850.8506 | 20800.42562 | 0.04827555  | 439183.1705  | 430385.3814 | 451369      | 0.001606668 | **  | 430850.8506 | 165383.195  | 2.605167052 | 0.125771096 |          |
| Lac           | C00186  | NT        | 16460043.35 | 1457930.558 | 0.088571983 | 15055158.69  | 16360201.24 | 17965850.13 | 0.000431732 | *** | 16460043.35 | 6573700.565 | 2.503987268 | 0.221782319 |          |
| Lac           | C00186  | I3sg2     | 6573700.565 | 658876.5604 | 0.100229171 | 6128783.081  | 6261692.614 |             |             |     |             |             |             |             |          |

| Name         | KEGG.ID | Condition | Iso        | Nr.C | Isotopologue Distribution |             |             |          |          | ANOVA  | Sig     |         |         |         |          |     |
|--------------|---------|-----------|------------|------|---------------------------|-------------|-------------|----------|----------|--------|---------|---------|---------|---------|----------|-----|
|              |         |           |            |      | Exp001                    | Exp002      | Exp003      | Norm_Av  | Norm_Std |        |         | CV      | MID001  | MID002  | MID003   | Av  |
| 2-HG         | C02630  | NT        | C12 PARENT | 5    | 2271349.59                | 1625827.395 | 1951086.888 | 65.76536 | 1.5724   | 0.0239 | 64.4451 | 63.4461 | 67.5049 | 65.7654 | 3.66E-05 | *** |
| 2-HG         | C02630  | I3sg2     | C12 PARENT | 5    | 1269493.211               | 1595707.463 | 1449432.882 | 92.88287 | 1.7379   | 0.0187 | 91.0192 | 93.1701 | 94.4593 | 92.8829 | 3.66E-05 | *** |
| 2-HG         | C02630  | NT        | C13-02     | 5    | 627376.0082               | 376907.4751 | 455884.7993 | 16.2408  | 1.3864   | 0.0854 | 17.8006 | 15.1489 | 15.773  | 16.2408 | 0.00201  | **  |
| 2-HG         | C02630  | I3sg2     | C13-02     | 5    | 120346.0607               | 104329.679  | 75764.15413 | 6.55254  | 1.8882   | 0.2882 | 8.62849 | 6.0916  | 4.93754 | 6.55254 | 0.00201  | **  |
| 2-HG         | C02630  | NT        | C13-03     | 5    | 196940.6132               | 154646.8542 | 137384.6061 | 5.518922 | 0.7336   | 0.1329 | 5.5878  | 6.21564 | 4.75332 | 5.51892 | 0.00034  | *** |
| 2-HG         | C02630  | I3sg2     | C13-03     | 5    | 4913.771116               | 0           | 9255.226371 | 0.318489 | 0.303    | 0.9514 | 0.3523  | 0       | 0.60316 | 0.31849 | 0.00034  | *** |
| 2-HG         | C02630  | NT        | C13-04     | 5    | 271939.4282               | 188381.7349 | 219132.9223 | 7.622993 | 0.0805   | 0.0106 | 7.71575 | 7.57153 | 7.5817  | 7.62299 | 7.91E-06 | *** |
| 2-HG         | C02630  | I3sg2     | C13-04     | 5    | 0                         | 12644.96109 | 0           | 0.246104 | 0.4263   | 1.7321 | 0       | 0.73831 | 0       | 0.2461  | 7.91E-06 | *** |
| 2-HG         | C02630  | NT        | C13-05     | 5    | 156867.4937               | 142263.1647 | 126798.1703 | 4.851921 | 0.7506   | 0.1547 | 4.45081 | 5.71791 | 4.38704 | 4.85192 | 0.00036  | *** |
| 2-HG         | C02630  | I3sg2     | C13-05     | 5    | 0                         | 0           | 0           | 0        | 0        | NA     | 0       | 0       | 0       | 0       | 0.00036  | *** |
| 3PG          | C00197  | NT        | C12 PARENT | 3    | 120371.2962               | 57828.54109 | 49565.87046 | 8.950552 | 0.104    | 0.0116 | 9.06221 | 8.85633 | 8.93312 | 8.95055 | 0.93228  |     |
| 3PG          | C00197  | I3sg2     | C12 PARENT | 3    | 62693.69187               | 73090.9014  | 120119.8278 | 9.126449 | 3.3666   | 0.3689 | 12.3699 | 5.64899 | 9.36047 | 9.12645 | 0.93228  |     |
| 3PG          | C00197  | NT        | C13-03     | 3    | 1207906.012               | 595134.503  | 505289.4191 | 91.04945 | 0.104    | 0.0011 | 90.9378 | 91.1437 | 91.0669 | 91.0494 | 0.93228  |     |
| 3PG          | C00197  | I3sg2     | C13-03     | 3    | 444131.5663               | 1220785.05  | 1163146.548 | 90.87355 | 3.3666   | 0.037  | 87.6301 | 94.351  | 90.6395 | 90.8736 | 0.93228  |     |
| 5-Oxoprolin  | C01879  | NT        | C12 PARENT | 5    | 16752451.52               | 18849129.95 | 16775304.91 | 91.70346 | 3.1103   | 0.0339 | 91.1211 | 95.0638 | 88.9259 | 91.7035 | 0.10625  |     |
| 5-Oxoprolin  | C01879  | I3sg2     | C12 PARENT | 5    | 12449711.95               | 12090181.77 | 11645690.55 | 95.52006 | 0.6672   | 0.007  | 96.1152 | 94.7988 | 95.6462 | 95.5201 | 0.10625  |     |
| 5-Oxoprolin  | C01879  | NT        | C13-01     | 5    | 0                         | 19349.52191 | 162469.1814 | 0.319611 | 0.4716   | 1.4755 | 0       | 0.09759 | 0.86125 | 0.31961 | 0.78879  |     |
| 5-Oxoprolin  | C01879  | I3sg2     | C13-01     | 5    | 0                         | 182460.1644 | 0           | 0.476889 | 0.826    | 1.7321 | 0       | 1.43067 | 0       | 0.47689 | 0.78879  |     |
| 5-Oxoprolin  | C01879  | NT        | C13-02     | 5    | 1054234.972               | 589752.5589 | 1261958.177 | 5.132746 | 1.9293   | 0.3759 | 5.73427 | 2.97436 | 6.68961 | 5.13275 | 0.15388  |     |
| 5-Oxoprolin  | C01879  | I3sg2     | C13-02     | 5    | 373759.9054               | 369459.4906 | 439784.7565 | 3.131469 | 0.4162   | 0.1329 | 2.88553 | 2.89692 | 3.61196 | 3.13147 | 0.15388  |     |
| 5-Oxoprolin  | C01879  | NT        | C13-04     | 5    | 380576.051                | 276736.4205 | 383603.6864 | 1.833075 | 0.3792   | 0.2069 | 2.07005 | 1.39569 | 2.03347 | 1.83307 | 0.00834  | **  |
| 5-Oxoprolin  | C01879  | I3sg2     | C13-04     | 5    | 101847.0388               | 86748.57716 | 45455.67323 | 0.613269 | 0.2145   | 0.3497 | 0.78629 | 0.68019 | 0.37333 | 0.61327 | 0.00834  | **  |
| 5-Oxoprolin  | C01879  | NT        | C13-05     | 5    | 197565.9747               | 92901.32043 | 281110.0035 | 1.011104 | 0.5138   | 0.5081 | 1.07461 | 0.46854 | 1.49016 | 1.0111  | 0.06714  |     |
| 5-Oxoprolin  | C01879  | I3sg2     | C13-05     | 5    | 27589.50421               | 24664.49623 | 44874.18899 | 0.258315 | 0.096    | 0.3715 | 0.213   | 0.19339 | 0.36855 | 0.25831 | 0.06714  |     |
| A            | C00212  | NT        | C12 PARENT | 10   | 93664.75249               | 87654.01645 | 13415.65534 | 56.07845 | 39.9354  | 0.7121 | 21.9518 | 46.2836 | 100     | 56.0784 | 0.72387  |     |
| A            | C00212  | I3sg2     | C12 PARENT | 10   | 46888.86549               | 249598.3752 | 190530.1793 | 47.20594 | 6.9488   | 0.1472 | 53.4233 | 39.7047 | 48.4898 | 47.2059 | 0.72387  |     |
| A            | C00212  | NT        | C13-05     | 10   | 282342.5644               | 78804.5574  | 0           | 35.92738 | 33.4498  | 0.931  | 66.1713 | 61.1608 | 0       | 35.9274 | 0.45224  |     |
| A            | C00212  | I3sg2     | C13-05     | 10   | 40879.68339               | 368916.903  | 202397.9199 | 52.25735 | 6.0887   | 0.1165 | 46.5767 | 58.6852 | 51.5102 | 52.2573 | 0.45224  |     |
| A            | C00212  | NT        | C13-06     | 10   | 50677.01512               | 22926.14921 | 0           | 7.994177 | 6.9241   | 0.8661 | 11.8769 | 12.1056 | 0       | 7.99418 | 0.13817  |     |
| A            | C00212  | I3sg2     | C13-06     | 10   | 0                         | 10121.86951 | 0           | 0.53671  | 0.9296   | 1.7321 | 0       | 1.61013 | 0       | 0.53671 | 0.13817  |     |
| a-KG         | C00026  | NT        | C12 PARENT | 5    | 221950.4663               | 2040182.852 | 1505859.682 | 73.51454 | 23.0306  | 0.3133 | 100     | 58.1979 | 62.3457 | 73.5145 | 0.20091  |     |
| a-KG         | C00026  | I3sg2     | C12 PARENT | 5    | 897901.686                | 157555.7015 | 123928.8261 | 95.15702 | 8.3883   | 0.0882 | 85.4711 | 100     | 100     | 95.157  | 0.20091  |     |
| a-KG         | C00026  | NT        | C13-02     | 5    | 0                         | 666386.777  | 441036.4304 | 12.42302 | 10.7652  | 0.8666 | 0       | 19.0092 | 18.2598 | 12.423  | 0.33725  |     |
| a-KG         | C00026  | I3sg2     | C13-02     | 5    | 133378.4825               | 0           | 0           | 4.232089 | 7.3302   | 1.7321 | 12.6963 | 0       | 4.23209 | 0.33725 |          |     |
| a-KG         | C00026  | NT        | C13-03     | 5    | 0                         | 204069.2913 | 139393.0111 | 3.864135 | 3.3465   | 0.866  | 0       | 5.82125 | 5.77116 | 3.86414 | 0.18367  |     |
| a-KG         | C00026  | I3sg2     | C13-03     | 5    | 19252.92448               | 0           | 0           | 0.610894 | 1.0581   | 1.7321 | 1.83268 | 0       | 0       | 0.61089 | 0.18367  |     |
| a-KG         | C00026  | NT        | C13-04     | 5    | 0                         | 372905.5368 | 174362.3419 | 5.952135 | 5.4307   | 0.9124 | 0       | 10.6374 | 7.21896 | 5.95214 | 0.13049  |     |
| a-KG         | C00026  | I3sg2     | C13-04     | 5    | 0                         | 0           | 0           | 0        | 0        | NA     | 0       | 0       | 0       | 0.13049 |          |     |
| a-KG         | C00026  | NT        | C13-05     | 5    | 0                         | 222048.3237 | 154687.6025 | 4.246167 | 3.6775   | 0.8661 | 0       | 6.33412 | 6.40438 | 4.24617 | 0.11613  |     |
| a-KG         | C00026  | I3sg2     | C13-05     | 5    | 0                         | 0           | 0           | 0        | 0        | NA     | 0       | 0       | 0       | 0.11613 |          |     |
| Ac-carnitine | C02571  | NT        | C12 PARENT | 9    | 8150464.274               | 10533812.82 | 9595272.951 | 64.96349 | 0.2891   | 0.0045 | 64.643  | 65.0427 | 65.2047 | 64.9635 | 7.52E-06 | *** |
| Ac-carnitine | C02571  | I3sg2     | C12 PARENT | 9    | 12128843.46               | 18575729.3  | 11616093.67 | 74.46248 | 0.4696   | 0.0063 | 74.8515 | 73.9408 | 74.5951 | 74.4625 | 7.52E-06 | *** |
| Ac-carnitine | C02571  | NT        | C13-01     | 9    | 0                         | 0           | 0           | 0        | 0        | NA     | 0       | 0       | 0       | NA      |          |     |
| Ac-carnitine | C02571  | I3sg2     | C13-01     | 9    | 0                         | 0           | 0           | 0        | 0        | NA     | 0       | 0       | 0       | NA      |          |     |
| Ac-carnitine | C02571  | NT        | C13-02     | 9    | 4457959.467               | 5661402.284 | 5120337.462 | 35.03651 | 0.2891   | 0.0083 | 35.357  | 34.9573 | 34.7953 | 35.0365 | 7.52E-06 | *** |
| Ac-carnitine | C02571  | I3sg2     | C13-02     | 9    | 4075028.508               | 6546694.83  | 3956100.255 | 25.53752 | 0.4696   | 0.0184 | 25.1485 | 26.0592 | 25.4049 | 25.5375 | 7.52E-06 | *** |
| Ac-carnitine | C02571  | NT        | C13-03     | 9    | 0                         | 0           | 0           | 0        | 0        | NA     | 0       | 0       | 0       | NA      |          |     |
| Ac-carnitine | C02571  | I3sg2     | C13-03     | 9    | 0                         | 0           | 0           | 0        | 0        | NA     | 0       | 0       | 0       | NA      |          |     |
| Acetyl-CoA   | C00024  | NT        | C12 PARENT | 23   | 9517.416111               | 3373.770277 | 4204.517733 | 6.638982 | 0.3184   | 0.048  | 6.94109 | 6.66941 | 6.30645 | 6.63898 | 0.00015  | *** |
| Acetyl-CoA   | C00024  | I3sg2     | C12 PARENT | 23   | 12564.41385               | 17037.49396 | 19468.52453 | 19.54804 | 1.5727   | 0.0805 | 19.6596 | 21.062  | 17.9226 | 19.548  | 0.00015  | *** |
| Acetyl-CoA   | C00024  | NT        | C13-01     | 23   | 0                         | 0           | 0           | 0        | 0        | NA     | 0       | 0       | 0       | NA      |          |     |
| Acetyl-CoA   | C00024  | I3sg2     | C13-01     | 23   | 0                         | 0           | 0           | 0        | 0        | NA     | 0       | 0       | 0       | NA      |          |     |
| Acetyl-CoA   | C00024  | NT        | C13-02     | 23   | 11945.82337               | 4352.101653 | 5776.803397 | 8.660101 | 0.0545   | 0.0063 | 8.71213 | 8.60341 | 8.66476 | 8.6601  | 0.00534  | **  |
| Acetyl-CoA   | C00024  | I3sg2     | C13-02     | 23   | 8631.768088               | 12051.61594 | 19169.82603 | 15.3507  | 2.1074   | 0.1373 | 13.5062 | 14.8984 | 17.6476 | 15.3507 | 0.00534  | **  |
| Acetyl-CoA   | C00024  | NT        | C13-03     | 23   | 688.5289125               | 0           | 423.8138992 | 0.379278 | 0.3352   | 0.8837 | 0.50215 | 0       | 0.63569 | 0.37928 | 0.13518  |     |
| Acetyl-CoA   | C00024  | I3sg2     | C13-03     | 23   | 983.0885913               | 1919.678362 | 522.1161192 | 1.46401  | 0.9484   | 0.6478 | 1.53825 | 2.37313 | 0.48066 | 1.46401 | 0.13518  |     |
| Acetyl-CoA   | C00024  | NT        | C13-04     | 23   | 0                         | 46.55930087 | 473.1523745 | 0.267244 | 0.3859   | 1.4441 | 0       | 0.09204 | 0.70969 | 0.26724 | 0.45704  |     |
| Acetyl-CoA   | C00024  | I3sg2     | C13-04     | 23   | 0                         | 470.3394876 | 1407.872616 | 0.625838 | 0.6492   | 1.0373 | 0       | 0.58144 | 1.29608 | 0.62584 | 0.45704  |     |
| Acetyl-CoA   | C00024  | NT        | C13-05     | 23   | 42622.53069               | 16339.56552 | 19101.95396 | 30.67898 | 1.8582   | 0.0606 | 31.0848 | 32.3007 | 28.6515 | 30.679  | 0.14764  |     |
| Acetyl-CoA   | C00024  | I3sg2     | C13-05     | 23   | 22283.46494               | 25832.60228 | 35510.43622 | 33.16409 | 1.5225   | 0.0459 | 34.8671 | 31.9346 | 32.6906 | 33.1641 | 0.14764  |     |
| Acetyl-CoA   | C00024  | NT        | C13-06     | 23   | 11851.68769               | 2725.319166 | 4611.00851  | 6.982386 | 1.629    | 0.2333 | 8.64348 | 5.38752 | 6.91616 | 6.98239 | 0.01693  | *   |
| Acetyl-CoA   | C00024  | I3sg2     | C13-06     | 23   | 1868.981717               | 2438.297673 | 736.7150909 | 2.205625 | 1.3235   | 0.6001 | 2.92441 | 3.01425 | 0.67821 | 2.20562 | 0.01693  | *   |
| Acetyl-CoA   | C00024  | NT        | C13-07     | 23   | 50169.                    |             |             |          |          |        |         |         |         |         |          |     |

|          |        |       |            |    |              |             |              |          |        |        |          |          |         |         |          |     |
|----------|--------|-------|------------|----|--------------|-------------|--------------|----------|--------|--------|----------|----------|---------|---------|----------|-----|
| ADP      | C00008 | I3sg2 | C13-03     | 10 | 190129.9806  | 402722.7825 | 335001.0518  | 1.477043 | 0.2319 | 0.157  | 1.23212  | 1.69315  | 1.50586 | 1.47704 | 0.01419  | *   |
| ADP      | C00008 | NT    | C13-04     | 10 | 385177.2014  | 208834.2685 | 497746.8222  | 1.817095 | 0.1405 | 0.0773 | 1.69236  | 1.78956  | 1.96936 | 1.8171  | 0.72143  |     |
| ADP      | C00008 | I3sg2 | C13-04     | 10 | 356265.8731  | 238373.4014 | 377560.6147  | 1.669365 | 0.6537 | 0.3916 | 2.30874  | 1.60218  | 1.69717 | 1.66936 | 0.72143  |     |
| ADP      | C00008 | NT    | C13-05     | 10 | 14776533.31  | 7396534.357 | 16516605.71  | 64.55197 | 1.0345 | 0.016  | 64.9241  | 63.3829  | 65.3489 | 64.552  | 0.87876  |     |
| ADP      | C00008 | I3sg2 | C13-05     | 10 | 10009853.6   | 15308179.83 | 14264016.37  | 64.44846 | 0.3827 | 0.0059 | 64.8678  | 64.3596  | 64.118  | 64.4485 | 0.87876  |     |
| ADP      | C00008 | NT    | C13-06     | 10 | 31866576.699 | 1743914.838 | 3355333.68   | 14.07354 | 0.8366 | 0.0594 | 14.001   | 14.9441  | 13.2756 | 14.0735 | 1.53E-05 | *** |
| ADP      | C00008 | I3sg2 | C13-06     | 10 | 215236.4313  | 197210.3387 | 299950.5481  | 1.190748 | 0.314  | 0.2637 | 1.39482  | 0.82912  | 1.3483  | 1.19075 | 1.53E-05 | *** |
| ADP      | C00008 | NT    | C13-07     | 10 | 1104882.937  | 547235.7931 | 1248426.348  | 4.827813 | 0.1272 | 0.0263 | 4.85456  | 4.68941  | 4.93947 | 4.82781 | 6.22E-07 | *** |
| ADP      | C00008 | I3sg2 | C13-07     | 10 | 85793.60144  | 141236.8263 | 114985.4586  | 0.555548 | 0.0385 | 0.0692 | 0.55598  | 0.5938   | 0.51687 | 0.55555 | 6.22E-07 | *** |
| ADP      | C00008 | NT    | C13-08     | 10 | 223953.6598  | 89705.19147 | 191594.6887  | 0.836918 | 0.1275 | 0.1523 | 0.98399  | 0.76871  | 0.75806 | 0.83692 | 0.00109  | **  |
| ADP      | C00008 | I3sg2 | C13-08     | 10 | 26158.95232  | 0           | 0            | 0.056507 | 0.0979 | 1.7321 | 0.16952  | 0        | 0       | 0.05651 | 0.00109  | **  |
| ADP      | C00008 | NT    | C13-09     | 10 | 0            | 0           | 0            | 0        | 0      | NA     | 0        | 0        | 0       | 0       | NA       |     |
| ADP      | C00008 | I3sg2 | C13-09     | 10 | 0            | 0           | 0            | 0        | 0      | NA     | 0        | 0        | 0       | 0       | NA       |     |
| Ala      | C00041 | NT    | C12 PARENT | 3  | 2091861.124  | 2097387.287 | 1895355.329  | 5.242978 | 0.1947 | 0.0371 | 5.45458  | 5.07136  | 5.203   | 5.24298 | 1.86E-05 | *** |
| Ala      | C00041 | I3sg2 | C12 PARENT | 3  | 1529124.371  | 1739006.781 | 1288955.196  | 10.46162 | 0.3266 | 0.0312 | 10.1645  | 10.8113  | 10.409  | 10.4616 | 1.86E-05 | *** |
| Ala      | C00041 | NT    | C13-01     | 3  | 68709.45841  | 131187.5721 | 23296.4467   | 0.186772 | 0.1268 | 0.6789 | 0.17916  | 0.3172   | 0.06395 | 0.18677 | 0.09858  |     |
| Ala      | C00041 | I3sg2 | C13-01     | 3  | 10162.06178  | 0           | 0            | 0.022517 | 0.039  | 1.7321 | 0.06755  | 0        | 0       | 0.02252 | 0.09858  |     |
| Ala      | C00041 | NT    | C13-02     | 3  | 507761.3836  | 342533.3653 | 441062.0488  | 1.120999 | 0.2598 | 0.2318 | 1.324    | 0.82822  | 1.21077 | 1.121   | 0.93212  |     |
| Ala      | C00041 | I3sg2 | C13-02     | 3  | 121292.0004  | 249115.0479 | 133700.5118  | 1.1449   | 0.3755 | 0.328  | 0.80626  | 1.54873  | 1.07971 | 1.1449  | 0.93212  |     |
| Ala      | C00041 | NT    | C13-03     | 3  | 35682236.86  | 38786420.53 | 34068400.64  | 93.44925 | 0.3758 | 0.004  | 93.0423  | 93.7832  | 93.5223 | 93.4493 | 0.00033  | *** |
| Ala      | C00041 | I3sg2 | C13-03     | 3  | 13383126.8   | 14097000.52 | 10960385.87  | 88.37096 | 0.6719 | 0.0076 | 88.9616  | 87.64    | 88.5113 | 88.371  | 0.00033  | *** |
| AMP      | C00020 | NT    | C12 PARENT | 10 | 1254212.957  | 427620.333  | 1802606.283  | 13.03607 | 0.6172 | 0.0473 | 12.7389  | 13.7457  | 12.6236 | 13.0361 | 2.79E-06 | *** |
| AMP      | C00020 | I3sg2 | C12 PARENT | 10 | 2551120.193  | 5112252.331 | 4581734.591  | 31.13451 | 0.5396 | 0.0173 | 30.5446  | 31.2558  | 31.6031 | 31.1345 | 2.79E-06 | *** |
| AMP      | C00020 | NT    | C13-01     | 10 | 0            | 0           | 0            | 0        | 0      | NA     | 0        | 0        | 0       | 0       | NA       |     |
| AMP      | C00020 | I3sg2 | C13-01     | 10 | 0            | 0           | 0            | 0        | 0      | NA     | 0        | 0        | 0       | 0       | NA       |     |
| AMP      | C00020 | NT    | C13-02     | 10 | 69820.9967   | 21881.11976 | 120476.5102  | 0.752073 | 0.0794 | 0.1056 | 0.70917  | 0.70336  | 0.84369 | 0.75207 | 0.23989  |     |
| AMP      | C00020 | I3sg2 | C13-02     | 10 | 63639.30566  | 139147.5195 | 157250.1952  | 0.899114 | 0.1667 | 0.1854 | 0.76195  | 0.85073  | 1.08465 | 0.89911 | 0.23989  |     |
| AMP      | C00020 | NT    | C13-03     | 10 | 80355.18213  | 19091.79762 | 1380753.2444 | 0.79888  | 0.1772 | 0.2218 | 0.81616  | 0.6137   | 0.96678 | 0.79888 | 0.00274  | **  |
| AMP      | C00020 | I3sg2 | C13-03     | 10 | 129753.0234  | 281019.3412 | 218707.7685  | 1.593409 | 0.1103 | 0.0692 | 1.55354  | 1.71812  | 1.50857 | 1.59341 | 0.00274  | **  |
| AMP      | C00020 | NT    | C13-04     | 10 | 141595.762   | 51596.15483 | 191539.6481  | 1.479353 | 0.1626 | 0.1099 | 1.43817  | 1.65854  | 1.34135 | 1.47935 | 0.08118  |     |
| AMP      | C00020 | I3sg2 | C13-04     | 10 | 96076.49732  | 204131.8425 | 189994.7165  | 1.236294 | 0.0807 | 0.0653 | 1.15033  | 1.24804  | 1.31051 | 1.23629 | 0.08118  |     |
| AMP      | C00020 | NT    | C13-05     | 10 | 6507803.713  | 2059824.748 | 9546683.042  | 66.38882 | 0.4077 | 0.0061 | 66.0991  | 66.2122  | 66.8551 | 66.3888 | 0.00496  | **  |
| AMP      | C00020 | I3sg2 | C13-05     | 10 | 5385143.714  | 10395070.85 | 9139827.588  | 63.69135 | 0.7263 | 0.0114 | 64.4764  | 63.5544  | 63.0432 | 63.6913 | 0.00496  | **  |
| AMP      | C00020 | NT    | C13-06     | 10 | 1306447.76   | 380050.7118 | 1798695.969  | 12.69408 | 0.5332 | 0.042  | 13.2695  | 12.1666  | 12.5962 | 12.6941 | 3.04E-06 | *** |
| AMP      | C00020 | I3sg2 | C13-06     | 10 | 86069.35884  | 142880.2632 | 116786.967   | 0.903207 | 0.1154 | 0.1277 | 1.03051  | 0.87356  | 0.80555 | 0.90321 | 3.04E-06 | *** |
| AMP      | C00020 | NT    | C13-07     | 10 | 371280.145   | 123143.2255 | 580866.1512  | 3.932411 | 0.1501 | 0.0382 | 3.77106  | 3.95839  | 4.06779 | 3.93241 | 3.80E-06 | *** |
| AMP      | C00020 | I3sg2 | C13-07     | 10 | 40312.3216   | 78281.87583 | 87981.00993  | 0.522271 | 0.0729 | 0.1395 | 0.48266  | 0.47861  | 0.60686 | 0.52271 | 3.80E-06 | *** |
| AMP      | C00020 | NT    | C13-08     | 10 | 114003.6669  | 27734.57707 | 100741.9219  | 0.918311 | 0.2274 | 0.2476 | 1.15792  | 0.89152  | 0.70549 | 0.91831 | 0.00241  | **  |
| AMP      | C00020 | I3sg2 | C13-08     | 10 | 0            | 3389.99559  | 5433.87439   | 0.019402 | 0.0188 | 0.9677 | 0        | 0.02073  | 0.03748 | 0.0194  | 0.00241  | **  |
| Arg-Succ | C03406 | NT    | C12 PARENT | 10 | 154869.1345  | 121329.099  | 132188.2529  | 74.11638 | 9.4032 | 0.1269 | 65.3486  | 72.9537  | 84.0469 | 74.1164 | 0.03572  | *   |
| Arg-Succ | C03406 | I3sg2 | C12 PARENT | 10 | 109555.3749  | 97272.36    | 89336.49916  | 93.76109 | 5.5617 | 0.0593 | 91.9605  | 100      | 89.3228 | 93.7611 | 0.03572  | *   |
| Arg-Succ | C03406 | NT    | C13-01     | 10 | 0            | 0           | 0            | 0        | 0      | NA     | 0        | 0        | 0       | 0       | NA       |     |
| Arg-Succ | C03406 | I3sg2 | C13-01     | 10 | 0            | 0           | 0            | 0        | 0      | NA     | 0        | 0        | 0       | 0       | NA       |     |
| Arg-Succ | C03406 | NT    | C13-02     | 10 | 59486.2517   | 37155.74661 | 17774.90698  | 19.5812  | 7.302  | 0.3729 | 25.1008  | 22.3413  | 11.3015 | 19.5812 | 0.06552  |     |
| Arg-Succ | C03406 | I3sg2 | C13-02     | 10 | 9577.742671  | 0           | 10678.84233  | 6.238911 | 5.5617 | 0.8915 | 0.803953 | 0        | 10.6772 | 6.23891 | 0.06552  |     |
| Arg-Succ | C03406 | NT    | C13-03     | 10 | 22633.90388  | 7824.963914 | 7315.981398  | 6.302415 | 2.8131 | 0.4464 | 9.5506   | 4.70505  | 4.65159 | 6.30241 | 0.01784  | *   |
| Arg-Succ | C03406 | I3sg2 | C13-03     | 10 | 0            | 0           | 0            | 0        | 0      | NA     | 0        | 0        | 0       | 0       | 0.01784  | *   |
| Asn      | C00152 | NT    | C12 PARENT | 4  | 2780582.06   | 2527489.417 | 2408666.759  | 70.05004 | 0.4372 | 0.0062 | 69.8363  | 70.553   | 69.7608 | 70.05   | 0.00073  | *** |
| Asn      | C00152 | I3sg2 | C12 PARENT | 4  | 1951541.419  | 2320789.327 | 2136092.36   | 84.54039 | 2.6468 | 0.0313 | 86.4596  | 81.5209  | 85.6406 | 84.5404 | 0.00073  | *** |
| Asn      | C00152 | NT    | C13-01     | 4  | 60378.09884  | 88608.12795 | 57054.03704  | 1.880764 | 0.5177 | 0.2753 | 1.51644  | 2.47343  | 1.65242 | 1.88076 | 0.00326  | **  |
| Asn      | C00152 | I3sg2 | C13-01     | 4  | 0            | 0           | 0            | 0        | 0      | NA     | 0        | 0        | 0       | 0       | 0.00326  | **  |
| Asn      | C00152 | NT    | C13-02     | 4  | 603494.3708  | 454848.7177 | 430201.5251  | 13.43788 | 1.4937 | 0.1112 | 15.1572  | 12.6968  | 12.4597 | 13.4379 | 0.00532  | **  |
| Asn      | C00152 | I3sg2 | C13-02     | 4  | 194940.7493  | 191852.1134 | 199293.3197  | 7.788561 | 0.9646 | 0.1239 | 8.6365   | 6.73907  | 7.99011 | 7.78856 | 0.00532  | **  |
| Asn      | C00152 | NT    | C13-03     | 4  | 417959.7235  | 363634.1368 | 430798.4371  | 11.04163 | 1.2551 | 0.1137 | 10.4973  | 10.1506  | 12.477  | 11.0416 | 0.03321  | **  |
| Asn      | C00152 | I3sg2 | C13-03     | 4  | 110689.756   | 251785.4531 | 158865.06    | 6.705826 | 1.9916 | 0.297  | 4.90391  | 8.84431  | 3.24888 | 6.70583 | 0.03321  | **  |
| Asn      | C00152 | NT    | C13-04     | 4  | 119159.5891  | 147815.4756 | 126029.1692  | 3.589683 | 0.5691 | 0.1585 | 2.99278  | 4.12616  | 3.65011 | 3.58968 | 0.06172  |     |
| Asn      | C00152 | I3sg2 | C13-04     | 4  | 0            | 82435.62517 | 0            | 0.965222 | 1.6718 | 1.7321 | 0        | 0.289567 | 0       | 0.96522 | 0.06172  |     |
| Asp      | C00049 | NT    | C12 PARENT | 4  | 32154892.03  | 24542365.12 | 27877575     | 60.42025 | 0.7794 | 0.0129 | 59.5763  | 60.5049  | 61.1249 | 60.4202 | 0.00176  | **  |
| Asp      | C00049 | I3sg2 | C12 PARENT | 4  | 27165058.1   | 33319660    | 30769846.5   | 66.01317 | 1.0518 | 0.0159 | 64.8543  | 66.2777  | 66.9075 | 66.0132 | 0.00176  | **  |
| Asp      | C00049 | NT    | C13-01     | 4  | 1913663.24   | 1528256.638 | 1481734.922  | 3.520717 | 0.2603 | 0.0739 | 3.54562  | 3.76765  | 3.24888 | 3.52072 | 0.40263  |     |
| Asp      | C00049 | I3sg2 | C13-01     | 4  | 1540355.686  | 1914619.888 | 1631559.476  | 3.677892 | 0.1304 | 0.0354 | 3.67747  | 3.80846  | 3.54774 | 3.67789 | 0.40263  |     |
| Asp      | C00049 | NT    | C13-02     | 4  | 9601040.366  | 6993917.662 | 7772719.579  | 17.35788 | 0.3863 | 0.0223 | 17.7887  | 17.2423  | 17.0426 | 17.3579 | 0.00937  | **  |
| Asp      | C00049 | I3sg2 | C13-02     | 4  | 6813391.504  | 7879825.78  | 7094103.767  | 15.78877 | 0.4319 | 0.0274 | 16.2664  | 15.6741  | 15.4258 | 15.7888 | 0.00937  | **  |
| Asp      | C00049 | NT    | C13-03     | 4  | 7326864.243  | 5248642.084 | 6027509.461  | 13.2436  | 0.3187 | 0.0241 | 13.5752  | 12.9396  | 13.216  | 13.2436 | 0.00146  | **  |
| Asp      | C00049 | I3sg2 | C13-03     | 4  | 4741028.854  | 5311437.832 | 4859928.939  | 10.81724 | 0.4344 | 0.0402 | 11.3188  | 10.5652  | 10.5677 | 10.8172 | 0.00146  | **  |
| Asp      | C00049 | NT    | C13-04     | 4  | 2976151.084  | 2249407.875 | 2448016.15   | 5.475759 | 0.095  | 0.0173 | 5.51419  | 5.54552  | 5.36757 | 5.47576 | 9.06E-05 | *** |
| Asp      | C00049 | I3sg2 | C13-04     | 4  | 1626421.33   | 1847271.5   | 1633223.763  | 3.702934 | 0.1676 | 0.0453 | 3.88295  | 3.67449  | 3.55136 | 3.70293 | 9.06E-05 | *** |
| ATP      | C00002 | NT    | C12 PARENT | 10 | 11153490.97  | 3874541.05  | 7495432.742  | 11.56215 | 0.1926 | 0.0167 | 11.7839  | 11.4661  | 11.4364 | 11.5621 | 1.92E-06 | *** |
| ATP      |        |       |            |    |              |             |              |          |        |        |          |          |         |         |          |     |

|             |        |       |            |    |             |             |             |          |        |          |         |         |         |         |          |     |
|-------------|--------|-------|------------|----|-------------|-------------|-------------|----------|--------|----------|---------|---------|---------|---------|----------|-----|
| CDP         | C00112 | NT    | C12 PARENT | 9  | 342163.5467 | 142841.224  | 412015.4535 | 21.10738 | 3.0952 | 0.1466   | 17.5984 | 23.4497 | 22.274  | 21.1074 | 5.30E-06 | *** |
| CDP         | C00112 | I3sg2 | C12 PARENT | 9  | 1037198.056 | 1974211.838 | 1922720.942 | 81.62394 | 0.8824 | 0.1008   | 81.4436 | 80.8456 | 82.5826 | 81.6239 | 5.30E-06 | *** |
| CDP         | C00112 | NT    | C13-04     | 9  | 21175.25282 | 0           | 3391.990307 | 0.244427 | 0.5829 | 1.3735   | 1.0891  | 0       | 0.18418 | 0.42443 | 0.27582  |     |
| CDP         | C00112 | I3sg2 | C13-04     | 9  | 0           | 0           | 0           | 0        | 0      | NA       | 0       | 0       | 0       | 0       | 0.27582  |     |
| CDP         | C00112 | NT    | C13-05     | 9  | 972910.9486 | 324689.0263 | 916896.3911 | 51.0428  | 1.9615 | 0.0384   | 50.0395 | 53.303  | 49.7859 | 51.0428 | 2.80E-05 | *** |
| CDP         | C00112 | I3sg2 | C13-05     | 9  | 226952.6521 | 429290.4146 | 332477.235  | 16.56031 | 1.9783 | 0.1195   | 17.8209 | 17.5798 | 14.2802 | 16.5603 | 2.80E-05 | *** |
| CDP         | C00112 | NT    | C13-06     | 9  | 142241.7651 | 24284.8352  | 105696.1001 | 5.680585 | 1.6653 | 0.2932   | 7.31589 | 3.98675 | 5.73912 | 5.68059 | 0.0047   | **  |
| CDP         | C00112 | I3sg2 | C13-06     | 9  | 0           | 0           | 10053.84008 | 0.14394  | 0.2493 | 1.7321   | 0       | 0       | 0.43182 | 0.14394 | 0.0047   | **  |
| CDP         | C00112 | NT    | C13-07     | 9  | 296415.4183 | 92937.10611 | 247893.2693 | 14.65426 | 1.0341 | 0.0706   | 15.2455 | 15.2571 | 13.4602 | 14.6543 | 0.00011  | *** |
| CDP         | C00112 | I3sg2 | C13-07     | 9  | 9365.669884 | 20596.69446 | 62987.87546 | 1.428085 | 1.1075 | 0.7755   | 0.73542 | 0.84345 | 2.70539 | 1.42809 | 0.00011  | *** |
| CDP         | C00112 | NT    | C13-08     | 9  | 169379.2804 | 24386.35081 | 157584.9338 | 7.090551 | 2.6747 | 0.3772   | 8.71164 | 4.00342 | 8.55659 | 7.09055 | 0.01188  | *   |
| CDP         | C00112 | I3sg2 | C13-08     | 9  | 0           | 17855.13451 | 0           | 0.243727 | 0.4221 | 1.7321   | 0       | 0.73118 | 0       | 0.24373 | 0.01188  | *   |
| CDP-choline | C00307 | NT    | C12 PARENT | 14 | 51199.42216 | 34520.61545 | 51263.66913 | 45.13635 | 4.7334 | 0.1049   | 50.316  | 41.0355 | 44.0576 | 45.1364 | 8.60E-05 | *** |
| CDP-choline | C00307 | I3sg2 | C12 PARENT | 14 | 252003.3265 | 315878.1802 | 257904.9199 | 90.22573 | 0.9872 | 0.1009   | 89.1182 | 91.0131 | 90.5459 | 90.2257 | 8.60E-05 | *** |
| CDP-choline | C00307 | NT    | C13-05     | 14 | 47230.61305 | 47362.33117 | 57974.32964 | 50.84711 | 5.0212 | 0.0988   | 46.4157 | 56.3008 | 49.8249 | 50.8471 | 0.00016  | *** |
| CDP-choline | C00307 | I3sg2 | C13-05     | 14 | 30771.04361 | 31190.80575 | 26928.27598 | 9.774268 | 0.9872 | 0.101    | 10.8818 | 8.98692 | 9.45405 | 9.77427 | 0.00016  | *** |
| CDP-choline | C00307 | NT    | C13-06     | 14 | 1435.212739 | 0           | 2101.795659 | 1.072265 | 0.9495 | 0.8855   | 1.41045 | 0       | 1.80635 | 1.07227 | 0.12211  | *   |
| CDP-choline | C00307 | I3sg2 | C13-06     | 14 | 0           | 0           | 0           | 0        | 0      | NA       | 0       | 0       | 0       | 0       | 0.12211  | *   |
| CDP-choline | C00307 | NT    | C13-07     | 14 | 1890.49908  | 2240.840415 | 5016.34876  | 2.944274 | 1.2505 | 0.4247   | 1.85788 | 2.66374 | 4.3112  | 2.94427 | 0.01512  | *   |
| CDP-choline | C00307 | I3sg2 | C13-07     | 14 | 0           | 0           | 0           | 0        | 0      | NA       | 0       | 0       | 0       | 0       | 0.01512  | *   |
| CDP-EtA     | C00570 | NT    | C12 PARENT | 11 | 314941.3469 | 250842.9926 | 303881.9018 | 26.72105 | 2.6981 | 0.101    | 29.7952 | 25.6217 | 24.7462 | 26.721  | 8.21E-06 | *** |
| CDP-EtA     | C00570 | I3sg2 | C12 PARENT | 11 | 1140422.223 | 1206247.884 | 1258452.954 | 86.10185 | 2.2675 | 0.0263   | 83.5117 | 87.7284 | 87.0655 | 86.1018 | 8.21E-06 | *** |
| CDP-EtA     | C00570 | NT    | C13-05     | 11 | 498388.0796 | 458125.7546 | 612544.8277 | 47.94205 | 1.6892 | 0.0352   | 47.1504 | 46.7941 | 49.8817 | 47.942  | 2.07E-05 | *** |
| CDP-EtA     | C00570 | I3sg2 | C13-05     | 11 | 209205.8017 | 159116.0998 | 177326.611  | 13.05346 | 1.9934 | 0.1527   | 15.3199 | 11.5722 | 12.2683 | 13.0535 | 2.07E-05 | *** |
| CDP-EtA     | C00570 | NT    | C13-06     | 11 | 75252.28874 | 58567.64887 | 94056.45694 | 6.920297 | 0.8561 | 0.1237   | 7.1193  | 5.98224 | 7.65935 | 6.9203  | 0.00015  | *** |
| CDP-EtA     | C00570 | I3sg2 | C13-06     | 11 | 0           | 0           | 0           | 0        | 0      | NA       | 0       | 0       | 0       | 0       | 0.00015  | *** |
| CDP-EtA     | C00570 | NT    | C13-07     | 11 | 126283.0802 | 142637.1013 | 155509.2741 | 13.06002 | 1.3553 | 0.1038   | 11.9471 | 14.5693 | 12.6637 | 13.06   | 9.32E-05 | *** |
| CDP-EtA     | C00570 | I3sg2 | C13-07     | 11 | 5501.689553 | 9616.189097 | 9630.352145 | 0.589507 | 0.1625 | 0.2756   | 0.40288 | 0.69937 | 0.66627 | 0.58951 | 9.32E-05 | *** |
| CDP-EtA     | C00570 | NT    | C13-08     | 11 | 42154.01349 | 68851.45584 | 62002.53588 | 5.356584 | 1.5454 | 0.2885   | 3.98801 | 7.03266 | 5.04909 | 5.35658 | 0.00534  | **  |
| CDP-EtA     | C00570 | I3sg2 | C13-08     | 11 | 10454.15832 | 0           | 0           | 0.255182 | 0.442  | 1.7321   | 0.76554 | 0       | 0       | 0.25518 | 0.00534  | **  |
| Cit         | C00158 | NT    | C12 PARENT | 6  | 47066543.3  | 38357352.27 | 40888529.53 | 33.31976 | 1.553  | 0.0466   | 32.9101 | 35.0635 | 32.0127 | 33.3198 | 0.00237  | **  |
| Cit         | C00158 | I3sg2 | C12 PARENT | 6  | 31344292.04 | 37067381.11 | 31842270.85 | 41.03751 | 1.1792 | 0.0287   | 41.1984 | 42.128  | 39.7862 | 41.0375 | 0.00237  | **  |
| Cit         | C00158 | NT    | C13-01     | 6  | 2679997.995 | 2347067.565 | 2331274.55  | 1.947667 | 0.1716 | 0.0881   | 1.87392 | 2.14386 | 1.82521 | 1.94767 | 0.03425  | *   |
| Cit         | C00158 | I3sg2 | C13-01     | 6  | 2286428.182 | 2289109.852 | 1861924.099 | 2.644433 | 0.3414 | 0.1291   | 3.00524 | 2.60163 | 2.32643 | 2.64443 | 0.03425  | *   |
| Cit         | C00158 | NT    | C13-02     | 6  | 48486708.79 | 35869266.54 | 46288822.54 | 34.30254 | 1.7725 | 0.0517   | 33.9032 | 32.7638 | 36.2407 | 34.3025 | 0.15639  | **  |
| Cit         | C00158 | I3sg2 | C13-02     | 6  | 23870961.18 | 27619505.41 | 26868667.13 | 32.11253 | 1.2638 | 0.0394   | 31.3756 | 31.3902 | 33.5718 | 32.1125 | 0.15639  | **  |
| Cit         | C00158 | NT    | C13-03     | 6  | 9568294.807 | 7308421.847 | 8268168.529 | 6.613144 | 0.1213 | 0.0183   | 6.6904  | 6.67568 | 6.47336 | 6.61314 | 0.91247  | **  |
| Cit         | C00158 | I3sg2 | C13-03     | 6  | 5135351.296 | 5757709.101 | 5210036.706 | 6.601137 | 0.1299 | 0.0197   | 6.74981 | 6.54378 | 6.50982 | 6.60114 | 0.91247  | **  |
| Cit         | C00158 | NT    | C13-04     | 6  | 18014539.78 | 13019728.79 | 15488945.41 | 12.20514 | 0.3584 | 0.0294   | 12.5962 | 11.8925 | 12.1267 | 12.2051 | 0.0005   | *** |
| Cit         | C00158 | I3sg2 | C13-04     | 6  | 7604973.012 | 8475481.755 | 7738016.032 | 9.765634 | 0.2002 | 0.0205   | 9.99584 | 9.63259 | 9.66847 | 9.76563 | 0.0005   | *** |
| Cit         | C00158 | NT    | C13-05     | 6  | 12970655.64 | 9698770.316 | 10829165.65 | 8.802306 | 0.2996 | 0.034    | 9.06942 | 8.85907 | 8.47843 | 8.80231 | 0.00033  | *** |
| Cit         | C00158 | I3sg2 | C13-05     | 6  | 4593304.519 | 5451387.961 | 5121011.484 | 6.248427 | 0.2418 | 0.0387   | 6.03736 | 6.19563 | 6.51229 | 6.24843 | 0.00033  | *** |
| Cit         | C00158 | NT    | C13-06     | 6  | 4228560.597 | 2877782.661 | 3631214.289 | 2.80944  | 0.1666 | 0.0593   | 2.95672 | 2.62863 | 2.84297 | 2.80944 | 0.00031  | *** |
| Cit         | C00158 | I3sg2 | C13-06     | 6  | 1246087.251 | 1326987.414 | 1300548.144 | 1.590331 | 0.0715 | 0.0449   | 1.63783 | 1.50815 | 1.62501 | 1.59033 | 0.00031  | *** |
| CMP         | C00055 | NT    | C12 PARENT | 9  | 20159.83598 | 12895.17299 | 21926.27547 | 20.02868 | 8.1776 | 0.4083   | 20.7754 | 27.8073 | 11.5033 | 20.0287 | 0.00019  | *** |
| CMP         | C00055 | I3sg2 | C12 PARENT | 9  | 231756.445  | 257536.5691 | 338333.5722 | 90.27715 | 4.2335 | 0.0469   | 93.3647 | 85.4512 | 92.0156 | 90.2771 | 0.00019  | *** |
| CMP         | C00055 | NT    | C13-05     | 9  | 76877.03314 | 33478.10048 | 168682.676  | 79.97132 | 8.1776 | 0.1023   | 79.2246 | 72.1927 | 88.4967 | 79.9713 | 0.00019  | *** |
| CMP         | C00055 | I3sg2 | C13-05     | 9  | 16470.69004 | 43847.90852 | 29357.97245 | 9.722853 | 4.2335 | 0.4354   | 6.63533 | 14.5488 | 7.9844  | 9.72285 | 0.00019  | *** |
| CoA         | C00010 | NT    | C12 PARENT | 21 | 72274.224   | 31411.856   | 51889.67099 | 24.2901  | 5.1202 | 0.2108   | 21.4372 | 30.2012 | 21.2319 | 24.2901 | 0.0031   | **  |
| CoA         | C00010 | I3sg2 | C12 PARENT | 21 | 42100.59733 | 74496.73368 | 83944.1265  | 45.93972 | 2.8922 | 0.063    | 46.9564 | 42.6765 | 48.1862 | 45.9397 | 0.0031   | **  |
| CoA         | C00010 | NT    | C13-01     | 21 | 0           | 0           | 0           | 0        | 0      | NA       | 0       | 0       | 0       | 0       | NA       |     |
| CoA         | C00010 | I3sg2 | C13-01     | 21 | 0           | 0           | 0           | 0        | 0      | NA       | 0       | 0       | 0       | 0       | NA       |     |
| CoA         | C00010 | NT    | C13-02     | 21 | 1479.812883 | 0           | 671.1277592 | 0.237845 | 0.2218 | 0.9324   | 0.43893 | 0       | 0.27461 | 0.23784 | 0.13677  | **  |
| CoA         | C00010 | I3sg2 | C13-02     | 21 | 0           | 0           | 0           | 0        | 0      | NA       | 0       | 0       | 0       | 0       | 0.13677  | **  |
| CoA         | C00010 | NT    | C13-03     | 21 | 2018.328003 | 912.6349812 | 2633.392324 | 0.851211 | 0.2405 | 0.2825   | 0.59866 | 0.87746 | 1.07752 | 0.85121 | 0.8068   | **  |
| CoA         | C00010 | I3sg2 | C13-03     | 21 | 476.6144711 | 2407.309646 | 654.1319527 | 0.762046 | 0.54   | 0.7086   | 0.53159 | 1.37906 | 0.37549 | 0.76205 | 0.8068   | **  |
| CoA         | C00010 | NT    | C13-04     | 21 | 5022.036109 | 1502.796088 | 3348.834878 | 1.434905 | 0.0603 | 0.042    | 1.48958 | 1.44487 | 1.37026 | 1.43491 | 0.20577  | **  |
| CoA         | C00010 | I3sg2 | C13-04     | 21 | 2458.733408 | 3415.434371 | 2419.839705 | 2.029318 | 0.6796 | 0.3349   | 2.74232 | 1.95658 | 1.38905 | 2.02932 | 0.20577  | **  |
| CoA         | C00010 | NT    | C13-05     | 21 | 209829.9316 | 60616.66312 | 152378.3528 | 60.95574 | 2.3176 | 0.038    | 62.2375 | 58.2803 | 62.3493 | 60.9557 | 0.00655  | **  |
| CoA         | C00010 | I3sg2 | C13-05     | 21 | 43381.93806 | 93219.60993 | 87189.53723 | 50.6123  | 2.5553 | 0.0505   | 48.3856 | 53.4021 | 50.0492 | 50.6123 | 0.00655  | **  |
| CoA         | C00010 | NT    | C13-06     | 21 | 41029.79182 | 8455.921928 | 27287.60631 | 10.48841 | 2.1033 | 0.2005   | 12.1698 | 8.13001 | 11.1654 | 10.4884 | 0.00108  | **  |
| CoA         | C00010 | I3sg2 | C13-06     | 21 | 0           | 847.3559085 | 0           | 0.161806 | 0.2803 | 1.7321   | 0       | 0.48542 | 0       | 0.16181 | 0.00108  | **  |
| CoA         | C00010 | NT    | C13-07     | 21 | 4086.45016  | 361.4863643 | 2881.432794 | 0.912881 | 0.4899 | 0.5366   | 1.21208 | 0.34755 | 1.17901 | 0.91288 | 0.03204  | *   |
| CoA         | C00010 | I3sg2 | C13-07     | 21 | 0           | 0           | 0           | 0        | 0      | NA       | 0       | 0       | 0       | 0       | 0.03204  | *   |
| CoA         | C00010 | NT    | C13-08     | 21 | 1403.057867 | 747.399524  | 3304.147519 | 0.828909 | 0.4776 | 0.5761   | 0.41616 | 0.71859 | 1.35197 | 0.82891 | 0.55841  | **  |
| CoA         | C00010 | I3sg2 | C13-08     | 21 | 1240.979794 | 175.1421288 | 0           | 0.494815 | 0.7718 | 1.5597   | 1.38411 | 0.10033 | 0       | 0.49482 | 0.55841  | **  |
| CoA         | C00010 | NT    | C13-09     | 21 | 0           | 0           | 0           | 0        | 0      | NA       | 0       | 0       | 0       | 0       | NA       |     |
| CoA         | C00010 | I3sg2 | C13-09     | 21 | 0           | 0           | 0           | 0        | 0      | NA       | 0       | 0       | 0       | 0       | NA       |     |
| Creatine    | C00300 | NT    | C12 PARENT | 4  | 410586112.7 | 384101393.7 | 436355417.9 | 95.10211 | 0.0773 | 8.00E-04 |         |         |         |         |          |     |

|               |        |       |            |    |             |             |             |          |         |          |         |         |         |         |          |     |
|---------------|--------|-------|------------|----|-------------|-------------|-------------|----------|---------|----------|---------|---------|---------|---------|----------|-----|
| CTP           | C00063 | I3sg2 | C13-08     | 9  | 8264.586624 | 10716.62338 | 16337.84278 | 0.463173 | 0.0676  | 0.146    | 0.45747 | 0.39858 | 0.53347 | 0.46317 | 1.65E-06 | *** |
| Cystathionine | C02291 | NT    | C12 PARENT | 7  | 4756593.125 | 3967319.001 | 3415265.563 | 89.62438 | 0.4559  | 0.0051   | 89.5498 | 90.113  | 89.2104 | 89.6244 | 4.81E-05 | *** |
| Cystathionine | C02291 | I3sg2 | C12 PARENT | 7  | 455483.2297 | 479574.2859 | 443495.2845 | 99.53987 | 0.797   | 0.008    | 98.6196 | 100     | 100     | 99.5399 | 4.81E-05 | *** |
| Cystathionine | C02291 | NT    | C13-01     | 7  | 146989.5337 | 135401.8643 | 137680.5827 | 3.146383 | 0.4191  | 0.1332   | 2.76729 | 3.07549 | 3.59636 | 3.14638 | 0.00666  | **  |
| Cystathionine | C02291 | I3sg2 | C13-01     | 7  | 6375.476258 | 0           | 0           | 0.460132 | 0.797   | 1.7321   | 1.3804  | 0       | 0       | 0.46013 | 0.00666  | **  |
| Cystathionine | C02291 | NT    | C13-02     | 7  | 99762.45041 | 78290.00704 | 55511.03065 | 1.702149 | 0.224   | 0.1316   | 1.87817 | 1.77827 | 1.45001 | 1.70215 | 0.00019  | *** |
| Cystathionine | C02291 | I3sg2 | C13-02     | 7  | 0           | 0           | 0           | 0        | 0       | NA       | 0       | 0       | 0       | 0       | 0.00019  | *** |
| Cystathionine | C02291 | NT    | C13-03     | 7  | 269762.2586 | 199488.3056 | 191980.8292 | 4.874851 | 0.2994  | 0.0614   | 5.07867 | 4.53114 | 5.01474 | 4.87485 | 9.40E-06 | *** |
| Cystathionine | C02291 | I3sg2 | C13-03     | 7  | 0           | 0           | 0           | 0        | 0       | NA       | 0       | 0       | 0       | 0       | 9.40E-06 | *** |
| Cystathionine | C02291 | NT    | C13-04     | 7  | 38568.74879 | 22105.81386 | 27889.4185  | 0.652241 | 0.13    | 0.1994   | 0.72611 | 0.50211 | 0.7285  | 0.65224 | 0.00097  | *** |
| Cystathionine | C02291 | I3sg2 | C13-04     | 7  | 0           | 0           | 0           | 0        | 0       | NA       | 0       | 0       | 0       | 0       | 0.00097  | *** |
| Cytosine      | C00380 | NT    | C12 PARENT | 4  | 259084.8789 | 299879.8578 | 345329.3249 | 70.00901 | 1.2287  | 0.0176   | 68.9109 | 69.7801 | 71.3361 | 70.009  | 1.87E-06 | *** |
| Cytosine      | C00380 | I3sg2 | C12 PARENT | 4  | 30990.03849 | 10554.20688 | 9793.809972 | 100      | 0       | 0        | 100     | 100     | 100     | 100     | 1.87E-06 | *** |
| Cytosine      | C00380 | NT    | C13-02     | 4  | 73870.70082 | 81722.80387 | 81563.57589 | 18.50442 | 1.4681  | 0.0793   | 19.648  | 19.0164 | 16.8489 | 18.5044 | 2.60E-05 | *** |
| Cytosine      | C00380 | I3sg2 | C13-02     | 4  | 0           | 0           | 0           | 0        | 0       | NA       | 0       | 0       | 0       | 0       | 2.60E-05 | *** |
| Cytosine      | C00380 | NT    | C13-03     | 4  | 43015.21862 | 48147.32923 | 57195.09877 | 11.48656 | 0.3083  | 0.0268   | 11.4411 | 11.2036 | 11.815  | 11.4866 | 3.45E-07 | *** |
| Cytosine      | C00380 | I3sg2 | C13-03     | 4  | 0           | 0           | 0           | 0        | 0       | NA       | 0       | 0       | 0       | 0       | 3.45E-07 | *** |
| F16BP         | C00354 | NT    | C12 PARENT | 6  | 32502.65739 | 58308.27656 | 83321.07041 | 2.034762 | 0.5201  | 0.2556   | 1.57157 | 1.93527 | 2.59744 | 2.03476 | 0.89559  | *** |
| F16BP         | C00354 | I3sg2 | C12 PARENT | 6  | 19928.70591 | 17726.72734 | 40901.60093 | 2.17588  | 1.6695  | 0.7673   | 0.99299 | 1.44911 | 4.08553 | 2.17588 | 0.89559  | *** |
| F16BP         | C00354 | NT    | C13-05     | 6  | 56796.367   | 88064.74024 | 40982.09591 | 2.315565 | 0.9033  | 0.3901   | 2.74622 | 2.9229  | 1.27757 | 2.31556 | 0.01187  | *   |
| F16BP         | C00354 | I3sg2 | C13-05     | 6  | 1049.230526 | 466.8480175 | 0           | 0.030148 | 0.027   | 0.8971   | 0.05228 | 0.03816 | 0       | 0.03015 | 0.01187  | *   |
| F16BP         | C00354 | NT    | C13-06     | 6  | 1978867.208 | 2866546.808 | 3083507.437 | 95.64967 | 0.4924  | 0.0051   | 95.6822 | 95.1418 | 96.125  | 95.6497 | 0.09626  | *** |
| F16BP         | C00354 | I3sg2 | C13-06     | 6  | 1985951.825 | 1205090.107 | 960230.5079 | 97.79397 | 1.6426  | 0.0168   | 98.9547 | 98.5127 | 95.9145 | 97.794  | 0.09626  | *** |
| G6P-F6P       | C00085 | NT    | C12 PARENT | 6  | 345243.0134 | 375248.3513 | 296311.9544 | 29.86638 | 5.8554  | 0.1961   | 29.8642 | 35.7228 | 24.0121 | 29.8664 | 0.02294  | *   |
| G6P-F6P       | C00085 | I3sg2 | C12 PARENT | 6  | 175040.5175 | 68975.68155 | 160580.1946 | 13.39372 | 5.3698  | 0.4009   | 18.1822 | 7.58808 | 14.4109 | 13.3937 | 0.02294  | *   |
| G6P-F6P       | C00085 | NT    | C13-05     | 6  | 21723.5602  | 0           | 31392.28844 | 1.474352 | 1.3194  | 0.8949   | 1.87913 | 0       | 2.54393 | 1.47435 | 0.13297  | **  |
| G6P-F6P       | C00085 | I3sg2 | C13-05     | 6  | 1121.911818 | 0           | 0           | 0.038846 | 0.0673  | 1.7321   | 0.11654 | 0       | 0       | 0.03885 | 0.13297  | **  |
| G6P-F6P       | C00085 | NT    | C13-06     | 6  | 789077.0977 | 675195.2287 | 906305.6442 | 68.65926 | 4.5966  | 0.0669   | 68.2567 | 64.2772 | 73.444  | 68.6593 | 0.01203  | **  |
| G6P-F6P       | C00085 | I3sg2 | C13-06     | 6  | 786539.1416 | 840025.2686 | 953719.9473 | 86.56744 | 5.4219  | 0.0626   | 81.7012 | 92.4119 | 85.5891 | 86.5674 | 0.01203  | **  |
| GDP           | C00035 | NT    | C12 PARENT | 10 | 196949.8239 | 77595.60437 | 236246.0346 | 8.49439  | 0.2015  | 0.0237   | 8.2635  | 8.63472 | 8.58495 | 8.49439 | 0.00061  | *** |
| GDP           | C00035 | I3sg2 | C12 PARENT | 10 | 223753.0024 | 460109.3592 | 441899.4849 | 16.57442 | 1.4172  | 0.0855   | 15.322  | 18.1129 | 16.2883 | 16.5744 | 0.00061  | *** |
| GDP           | C00035 | NT    | C13-04     | 10 | 53041.69674 | 27756.59614 | 23131.09541 | 2.051588 | 1.1341  | 0.5528   | 2.22549 | 3.08871 | 0.84056 | 2.05159 | 0.03795  | *   |
| GDP           | C00035 | I3sg2 | C13-04     | 10 | 0           | 3639.50146  | 0           | 0.047758 | 0.0827  | 1.7321   | 0       | 0.14327 | 0       | 0.04776 | 0.03795  | *   |
| GDP           | C00035 | NT    | C13-05     | 10 | 1537423.441 | 614289.9815 | 1916444.424 | 67.50175 | 2.6725  | 0.0396   | 64.5063 | 68.3753 | 69.6417 | 67.5017 | 0.00387  | **  |
| GDP           | C00035 | I3sg2 | C13-05     | 10 | 1211688.185 | 1973897.476 | 2217639.402 | 80.80686 | 2.7556  | 0.0341   | 82.9734 | 77.7054 | 81.7418 | 80.8069 | 0.00387  | **  |
| GDP           | C00035 | NT    | C13-06     | 10 | 414090.7536 | 132192.3424 | 406196.5155 | 15.61504 | 1.5237  | 0.0976   | 17.3742 | 14.7102 | 14.7608 | 15.615  | 0.00034  | *** |
| GDP           | C00035 | I3sg2 | C13-06     | 10 | 24892.63078 | 102584.7758 | 53443.05475 | 2.570963 | 1.2777  | 0.497    | 1.70458 | 4.0384  | 1.9699  | 2.57096 | 0.00034  | *** |
| GDP           | C00035 | NT    | C13-07     | 10 | 180041.3572 | 45740.9924  | 153252.065  | 6.071028 | 1.3065  | 0.2152   | 7.55407 | 5.08999 | 5.56903 | 6.07103 | 0.00129  | **  |
| GDP           | C00035 | I3sg2 | C13-07     | 10 | 0           | 0           | 0           | 0        | 0       | NA       | 0       | 0       | 0       | 0       | 0.00129  | **  |
| GDP           | C00035 | NT    | C13-08     | 10 | 1822.653238 | 1070.83683  | 16593.52879 | 0.266209 | 0.2924  | 1.0985   | 0.07647 | 0.11916 | 0.60299 | 0.26621 | 0.19     |     |
| GDP           | C00035 | I3sg2 | C13-08     | 10 | 0           | 0           | 0           | 0        | 0       | NA       | 0       | 0       | 0       | 0       | 0.19     |     |
| Glc           | C00031 | NT    | C12 PARENT | 6  | 0           | 105757.4095 | 105917.2104 | 0.688196 | 0.602   | 0.8747   | 0       | 0.94775 | 1.11684 | 0.6882  | 0.57672  | **  |
| Glc           | C00031 | I3sg2 | C12 PARENT | 6  | 329490.87   | 269551.3128 | 0           | 1.081933 | 0.949   | 0.8772   | 1.7736  | 1.4722  | 0       | 1.08193 | 0.57672  | **  |
| Glc           | C00031 | NT    | C13-05     | 6  | 134172.9721 | 123311.0218 | 208918.5475 | 1.762712 | 0.5803  | 0.3292   | 1.98015 | 1.10506 | 2.20293 | 1.76271 | 0.5303   | **  |
| Glc           | C00031 | I3sg2 | C13-05     | 6  | 256832.6984 | 277902.1868 | 379171.2788 | 1.52553  | 0.1471  | 0.0964   | 1.38249 | 1.51781 | 1.67629 | 1.52553 | 0.5303   | **  |
| Glc           | C00031 | NT    | C13-06     | 6  | 6641734.685 | 10929742.1  | 9168821.883 | 97.54909 | 0.7533  | 0.0077   | 98.0199 | 97.9472 | 96.6802 | 97.5491 | 0.81849  | **  |
| Glc           | C00031 | I3sg2 | C13-06     | 6  | 17991180.45 | 17761984.31 | 22240511.39 | 97.39254 | 0.8107  | 0.0083   | 96.8439 | 97.01   | 98.3237 | 97.3925 | 0.81849  | **  |
| GlcNAc-6P     | C00357 | NT    | C12 PARENT | 8  | 146887.9845 | 135669.4611 | 128856.9008 | 26.3888  | 2.2596  | 0.0856   | 25.0495 | 28.9977 | 25.1193 | 26.3888 | 0.8016   | **  |
| GlcNAc-6P     | C00357 | I3sg2 | C12 PARENT | 8  | 64682.26962 | 130383.2455 | 57805.61833 | 27.8078  | 8.7079  | 0.319    | 31.0359 | 34.6127 | 17.7749 | 27.8078 | 0.8016   | **  |
| GlcNAc-6P     | C00357 | NT    | C13-06     | 8  | 196234.3376 | 136875.2726 | 202189.5442 | 34.00493 | 5.1044  | 0.1499   | 33.4647 | 29.2554 | 39.4147 | 34.0049 | 0.45703  | **  |
| GlcNAc-6P     | C00357 | I3sg2 | C13-06     | 8  | 66931.93631 | 129321.8658 | 179986.6651 | 40.59701 | 12.8199 | 0.3158   | 32.1153 | 34.3309 | 55.3448 | 40.597  | 0.45703  | **  |
| GlcNAc-6P     | C00357 | NT    | C13-08     | 8  | 243269.3107 | 195318.6719 | 181933.8075 | 39.56627 | 3.5533  | 0.0898   | 41.4858 | 41.7469 | 35.466  | 39.5663 | 0.08775  | **  |
| GlcNAc-6P     | C00357 | I3sg2 | C13-08     | 8  | 76797.25573 | 116987.0551 | 87417.27    | 31.59519 | 5.0061  | 0.1584   | 36.8489 | 31.0564 | 26.8803 | 31.5952 | 0.08775  | **  |
| Gln           | C00064 | NT    | C12 PARENT | 5  | 764970010.8 | 657922508.5 | 675408713.7 | 98.87122 | 0.0393  | 4.00E-04 | 98.882  | 98.8277 | 98.904  | 98.8712 | 0.0002   | *** |
| Gln           | C00064 | I3sg2 | C12 PARENT | 5  | 604357980.9 | 620999834.9 | 653120321.1 | 99.55686 | 0.0828  | 8.00E-04 | 99.4906 | 99.6497 | 99.5303 | 99.5569 | 0.0002   | *** |
| Gln           | C00064 | NT    | C13-01     | 5  | 342615.3006 | 1241900.351 | 538678.7454 | 0.103239 | 0.0742  | 0.7186   | 0.04429 | 0.18655 | 0.07888 | 0.10324 | 0.51392  | **  |
| Gln           | C00064 | I3sg2 | C13-01     | 5  | 717410.8897 | 0           | 483357.1542 | 0.06392  | 0.0597  | 0.9332   | 0.1181  | 0       | 0.07366 | 0.06392 | 0.51392  | **  |
| Gln           | C00064 | NT    | C13-02     | 5  | 1507498.355 | 1478846.26  | 1846762.829 | 0.229145 | 0.0383  | 0.167    | 0.19486 | 0.22214 | 0.27043 | 0.22915 | 0.00049  | *** |
| Gln           | C00064 | I3sg2 | C13-02     | 5  | 0           | 0           | 0           | 0        | 0       | NA       | 0       | 0       | 0       | 0       | 0.00049  | *** |
| Gln           | C00064 | NT    | C13-03     | 5  | 1790163.751 | 1476159.045 | 1569205.443 | 0.227642 | 0.0052  | 0.0227   | 0.2314  | 0.22174 | 0.22979 | 0.22764 | 0.00511  | *** |
| Gln           | C00064 | I3sg2 | C13-03     | 5  | 877160.2682 | 628832.4014 | 1019889.882 | 0.133576 | 0.0288  | 0.2158   | 0.1444  | 0.10091 | 0.15542 | 0.13358 | 0.00511  | *** |
| Gln           | C00064 | NT    | C13-04     | 5  | 2990589.3   | 2144450.377 | 2127125.616 | 0.34006  | 0.0406  | 0.1195   | 0.38657 | 0.32212 | 0.31149 | 0.34006 | 0.00261  | **  |
| Gln           | C00064 | I3sg2 | C13-04     | 5  | 881634.7157 | 1100133.557 | 1177645.293 | 0.167045 | 0.019   | 0.1139   | 0.14514 | 0.17653 | 0.17946 | 0.16704 | 0.00261  | **  |
| Gln           | C00064 | NT    | C13-05     | 5  | 2018264.809 | 1462943.701 | 1402957.698 | 0.228694 | 0.0288  | 0.1259   | 0.26089 | 0.21975 | 0.20544 | 0.22869 | 0.00186  | **  |
| Gln           | C00064 | I3sg2 | C13-05     | 5  | 618163.6708 | 453947.4204 | 401573.0671 | 0.078601 | 0.0209  | 0.2657   | 0.10176 | 0.07284 | 0.0612  | 0.0786  | 0.00186  | **  |
| Glu           | C00025 | NT    | C12 PARENT | 5  | 286803812.2 | 242392072   | 229857793   | 58.17576 | 0.2071  | 0.0036   | 58.0374 | 58.0759 | 58.4139 | 58.1758 | 5.89E-06 | *** |
| Glu           | C00025 | I3sg2 | C12 PARENT | 5  | 229311806   | 264495610.6 | 252734443.4 | 66.08472 | 0.379   | 0.0057   | 65.6946 | 66.1081 | 66.4515 | 66.0847 | 5.89E-06 | *** |
| Glu           | C00025 | NT    | C13-01     | 5  | 6957775.429 | 6118268.567 | 5933620.525 | 1.460597 | 0.0502  | 0.0344   | 1.40797 | 1.46591 | 1.50791 | 1.4606  | 0.00083  | *** |
| Glu           | C00025 |       |            |    |             |             |             |          |         |          |         |         |         |         |          |     |



|       |        |       |            |    |               |             |             |          |        |          |         |         |         |         |          |         |
|-------|--------|-------|------------|----|---------------|-------------|-------------|----------|--------|----------|---------|---------|---------|---------|----------|---------|
| MTA   | C00170 | I3sg2 | C12 PARENT | 11 | 494754.9977   | 245386.0702 | 147472.67   | 28.11933 | 1.4642 | 0.0521   | 26.4611 | 28.6629 | 29.234  | 28.1193 | 3.21E-05 | ***     |
| MTA   | C00170 | NT    | C13-01     | 11 | 0             | 0           | 0           | 0        | 0      | NA       | 0       | 0       | 0       | 0       | 0        | NA      |
| MTA   | C00170 | I3sg2 | C13-01     | 11 | 0             | 0           | 0           | 0        | 0      | NA       | 0       | 0       | 0       | 0       | 0        | NA      |
| MTA   | C00170 | NT    | C13-02     | 11 | 1346.837799   | 38517.7856  | 41918.23727 | 0.559459 | 0.3429 | 0.6129   | 0.20902 | 0.57509 | 0.89427 | 0.55946 | 0.80689  |         |
| MTA   | C00170 | I3sg2 | C13-02     | 11 | 24384.85836   | 0           | 0           | 0.434727 | 0.753  | 1.7321   | 1.30418 | 0       | 0       | 0       | 0.43473  | 0.80689 |
| MTA   | C00170 | NT    | C13-03     | 11 | 0             | 56044.72264 | 43625.49116 | 0.589157 | 0.5124 | 0.8697   | 0       | 0.83678 | 0.93069 | 0.58916 | 0.60296  |         |
| MTA   | C00170 | I3sg2 | C13-03     | 11 | 15569.66153   | 6808.224729 | 3273.058414 | 0.758932 | 0.0972 | 0.128    | 0.83272 | 0.79525 | 0.64883 | 0.75893 | 0.60296  |         |
| MTA   | C00170 | NT    | C13-04     | 11 | 0             | 89206.18664 | 65825.84868 | 0.912068 | 0.7907 | 0.8669   | 0       | 1.3319  | 1.4043  | 0.91207 | 0.26091  |         |
| MTA   | C00170 | I3sg2 | C13-04     | 11 | 9330.9749     | 3026.356096 | 0           | 0.284184 | 0.2566 | 0.9031   | 0.49905 | 0.3535  | 0       | 0.28418 | 0.26091  |         |
| MTA   | C00170 | NT    | C13-05     | 11 | 464212.5647   | 4615728.548 | 3234062.809 | 69.98364 | 1.7822 | 0.0255   | 72.0411 | 68.9157 | 68.9941 | 69.9836 | 0.87814  |         |
| MTA   | C00170 | I3sg2 | C13-05     | 11 | 1311621.981   | 600889.4735 | 353710.8598 | 70.15179 | 0.0356 | 5.00E-04 | 70.1498 | 70.1883 | 70.1172 | 70.1518 | 0.87814  |         |
| MTA   | C00170 | NT    | C13-06     | 11 | 89868.22534   | 857388.7429 | 556183.6612 | 12.87113 | 1.0424 | 0.081    | 13.9466 | 12.8014 | 11.8654 | 12.8711 | 4.20E-05 | ***     |
| MTA   | C00170 | I3sg2 | C13-06     | 11 | 14081.0032    | 0           | 0           | 0.251033 | 0.4348 | 1.7321   | 0.7531  | 0       | 0       | 0.25103 | 4.20E-05 | ***     |
| MTA   | C00170 | NT    | C13-07     | 11 | 22485.55268   | 291280.8773 | 205673.7298 | 4.075431 | 0.5078 | 0.1246   | 3.48953 | 4.34901 | 4.38776 | 4.07543 | 0.00016  | ***     |
| MTA   | C00170 | I3sg2 | C13-07     | 11 | 0             | 0           | 0           | 0        | 0      | NA       | 0       | 0       | 0       | 0       | 0.00016  | ***     |
| MTA   | C00170 | NT    | C13-08     | 11 | 0             | 58705.71201 | 39633.82419 | 0.574015 | 0.4974 | 0.8664   | 0       | 0.87651 | 0.84553 | 0.57401 | 0.11625  |         |
| MTA   | C00170 | I3sg2 | C13-08     | 11 | 0             | 0           | 0           | 0        | 0      | NA       | 0       | 0       | 0       | 0       | 0.11625  |         |
| NAD+  | C00003 | NT    | C12 PARENT | 21 | 303730.8281   | 274333.5146 | 245315.7587 | 3.517316 | 0.0802 | 0.0228   | 3.47981 | 3.46276 | 3.60938 | 3.51732 | 0.00049  | ***     |
| NAD+  | C00003 | I3sg2 | C12 PARENT | 21 | 224896.6408   | 38199.3709  | 34526.99424 | 6.943981 | 0.5672 | 0.0817   | 6.7687  | 6.48514 | 7.5781  | 6.94398 | 0.00049  | ***     |
| NAD+  | C00003 | NT    | C13-04     | 21 | 34484.85254   | 34335.15927 | 30490.39976 | 0.425698 | 0.0276 | 0.0648   | 0.39509 | 0.43339 | 0.44861 | 0.4257  | 0.80224  |         |
| NAD+  | C00003 | I3sg2 | C13-04     | 21 | 57944.42641   | 0           | 0           | 0.581317 | 1.0069 | 1.7321   | 1.74395 | 0       | 0       | 0.58132 | 0.80224  |         |
| NAD+  | C00003 | NT    | C13-05     | 21 | 1703257.379   | 1555179.266 | 1287179.868 | 19.36091 | 0.3704 | 0.0191   | 19.514  | 19.6302 | 18.9385 | 19.3609 | 0.00073  | ***     |
| NAD+  | C00003 | I3sg2 | C13-05     | 21 | 1216926.6     | 192154.8777 | 175903.5787 | 35.952   | 3.0492 | 0.0848   | 36.6258 | 32.6223 | 38.6079 | 35.952  | 0.00073  | ***     |
| NAD+  | C00003 | NT    | C13-06     | 21 | 0             | 18961.37842 | 2078.901175 | 0.089975 | 0.1303 | 1.4477   | 0       | 0.23934 | 0.03059 | 0.08998 | 0.69522  |         |
| NAD+  | C00003 | I3sg2 | C13-06     | 21 | 5139.808954   | 0           | 0           | 0.051564 | 0.0893 | 1.7321   | 0.15469 | 0       | 0       | 0.05156 | 0.69522  |         |
| NAD+  | C00003 | NT    | C13-07     | 21 | 138719.1735   | 104894.1186 | 107107.1045 | 1.496399 | 0.1494 | 0.0999   | 1.58929 | 1.32402 | 1.57589 | 1.4964  | 0.04744  | *       |
| NAD+  | C00003 | I3sg2 | C13-07     | 21 | 39754.70447   | 1088.788535 | 1473.774223 | 0.56827  | 0.5485 | 0.9651   | 1.1965  | 0.18484 | 0.32347 | 0.56827 | 0.04744  | *       |
| NAD+  | C00003 | NT    | C13-08     | 21 | 151389.186    | 132588.4739 | 112196.8728 | 1.686271 | 0.0433 | 0.0257   | 1.73445 | 1.67359 | 1.65077 | 1.68627 | 0.46349  |         |
| NAD+  | C00003 | I3sg2 | C13-08     | 21 | 81325.28907   | 0           | 3963.223201 | 1.105835 | 1.2408 | 1.122    | 2.44764 | 0       | 0.86986 | 1.10583 | 0.46349  |         |
| NAD+  | C00003 | NT    | C13-09     | 21 | 234473.2712   | 171744.6571 | 184405.1432 | 2.522453 | 0.3074 | 0.1219   | 2.68633 | 2.16784 | 2.71319 | 2.52245 | 0.94585  |         |
| NAD+  | C00003 | I3sg2 | C13-09     | 21 | 90873.03329   | 25868.45854 | 782.4153056 | 2.432813 | 1.2262 | 0.874    | 2.735   | 4.39171 | 0.17173 | 2.43281 | 0.94585  |         |
| NAD+  | C00003 | NT    | C13-10     | 21 | 4977614.648   | 4625650.275 | 3969148.889 | 57.93795 | 0.7881 | 0.0136   | 57.0279 | 58.3871 | 58.3988 | 57.9379 | 0.05622  |         |
| NAD+  | C00003 | I3sg2 | C13-10     | 21 | 1557238.705   | 329049.2939 | 224855.2103 | 50.69437 | 4.6453 | 0.0916   | 46.8681 | 55.863  | 49.352  | 50.6944 | 0.05622  |         |
| NAD+  | C00003 | NT    | C13-11     | 21 | 839987.8241   | 719582.4931 | 599258.6269 | 9.174515 | 0.411  | 0.0448   | 9.62364 | 9.0829  | 8.817   | 9.17452 | 0.00079  | ***     |
| NAD+  | C00003 | I3sg2 | C13-11     | 21 | 35550.97704   | 2668.305577 | 14110.30229 | 1.539984 | 1.3832 | 0.8982   | 1.06998 | 0.453   | 3.09698 | 1.53998 | 0.00079  | ***     |
| NAD+  | C00003 | NT    | C13-12     | 21 | 305889.8427   | 233206.2792 | 223367.6471 | 3.244877 | 0.2828 | 0.0871   | 3.50454 | 2.94364 | 3.28645 | 3.24488 | 0.00012  | ***     |
| NAD+  | C00003 | I3sg2 | C13-12     | 21 | 12945.29477   | 0           | 0           | 0.129871 | 0.2249 | 1.7321   | 0.38961 | 0       | 0       | 0.12987 | 0.00012  | ***     |
| NAD+  | C00003 | NT    | C13-13     | 21 | 38830.5185    | 51912.08224 | 36075.04397 | 0.543638 | 0.1058 | 0.1946   | 0.44488 | 0.65526 | 0.53078 | 0.54364 | 0.00088  | ***     |
| NAD+  | C00003 | I3sg2 | C13-13     | 21 | 0             | 0           | 0           | 0        | 0      | NA       | 0       | 0       | 0       | 0       | 0.00088  | ***     |
| NAD+  | C00003 | NT    | C13-14     | 21 | 0             | 0           | 0           | 0        | 0      | NA       | 0       | 0       | 0       | 0       | 0        | NA      |
| NAD+  | C00003 | I3sg2 | C13-14     | 21 | 0             | 0           | 0           | 0        | 0      | NA       | 0       | 0       | 0       | 0       | 0        | NA      |
| NADH  | C00004 | NT    | C12 PARENT | 21 | 12377.96966   | 3927.043978 | 5172.943273 | 1.936284 | 0.2146 | 0.1108   | 2.17868 | 1.85947 | 1.77071 | 1.93628 | 0.81387  |         |
| NADH  | C00004 | I3sg2 | C12 PARENT | 21 | 28498.25872   | 0           | 0           | 2.587647 | 4.4819 | 1.7321   | 7.76294 | 0       | 0       | 2.58765 | 0.81387  |         |
| NADH  | C00004 | NT    | C13-04     | 21 | 736.3550367   | 0           | 3150.273536 | 0.402651 | 0.5887 | 1.4622   | 0.12961 | 0       | 1.07835 | 0.40265 | 0.97422  |         |
| NADH  | C00004 | I3sg2 | C13-04     | 21 | 0             | 1448.966055 | 0           | 0.384991 | 0.6668 | 1.7321   | 0       | 1.15497 | 0       | 0.38499 | 0.97422  |         |
| NADH  | C00004 | NT    | C13-05     | 21 | 93845.96316   | 43792.68171 | 65604.69894 | 19.90355 | 3.0556 | 0.1535   | 16.518  | 20.736  | 22.4567 | 19.9036 | 0.00093  | ***     |
| NADH  | C00004 | I3sg2 | C13-05     | 21 | 138085.4297   | 53815.04762 | 52846.89212 | 40.46067 | 2.6646 | 0.0659   | 37.6145 | 42.896  | 40.8714 | 40.4607 | 0.00093  | ***     |
| NADH  | C00004 | NT    | C13-06     | 21 | 0             | 0           | 0           | 0        | 0      | NA       | 0       | 0       | 0       | 0       | 0        | NA      |
| NADH  | C00004 | I3sg2 | C13-06     | 21 | 0             | 0           | 0           | 0        | 0      | NA       | 0       | 0       | 0       | 0       | 0        | NA      |
| NADH  | C00004 | NT    | C13-07     | 21 | 3334.406578   | 0           | 415.9177419 | 0.243089 | 0.3061 | 1.2594   | 0.5869  | 0       | 0.14237 | 0.24309 | 0.57841  |         |
| NADH  | C00004 | I3sg2 | C13-07     | 21 | 7157.658044   | 0           | 0           | 0.649917 | 1.1257 | 1.7321   | 1.94795 | 0       | 0       | 0.64992 | 0.57841  |         |
| NADH  | C00004 | NT    | C13-08     | 21 | 10328.98913   | 5480.487155 | 1954.309969 | 1.694007 | 0.969  | 0.572    | 1.81803 | 2.59503 | 0.66897 | 1.69401 | 0.50342  |         |
| NADH  | C00004 | I3sg2 | C13-08     | 21 | 10018.51218   | 0           | 0           | 0.909683 | 1.5756 | 1.7321   | 2.72905 | 0       | 0       | 0.90968 | 0.50342  |         |
| NADH  | C00004 | NT    | C13-09     | 21 | 0             | 977.1455693 | 0           | 0.154227 | 0.2671 | 1.7321   | 0       | 0.46268 | 0       | 0.15423 | 0.49312  |         |
| NADH  | C00004 | I3sg2 | C13-09     | 21 | 5609.609164   | 0           | 132.5405938 | 0.543522 | 0.8542 | 1.5716   | 1.52806 | 0       | 0.10251 | 0.54352 | 0.49312  |         |
| NADH  | C00004 | NT    | C13-10     | 21 | 408719.6142   | 131697.3467 | 182436.4044 | 65.58239 | 5.5058 | 0.084    | 71.9397 | 62.359  | 62.4484 | 65.5824 | 0.03863  | *       |
| NADH  | C00004 | I3sg2 | C13-10     | 21 | 177092.7842   | 70190.60656 | 71940.90808 | 53.27594 | 4.3639 | 0.0819   | 48.2402 | 55.949  | 55.6386 | 53.2759 | 0.03863  | *       |
| NADH  | C00004 | NT    | C13-11     | 21 | 26671.97196   | 23260.14652 | 25590.0142  | 8.155955 | 3.2025 | 0.3927   | 4.6946  | 11.0137 | 8.75953 | 8.15595 | 0.0119   | *       |
| NADH  | C00004 | I3sg2 | C13-11     | 21 | 644.2092097   | 0           | 0           | 0.058494 | 0.1013 | 1.7321   | 0.17548 | 0       | 0       | 0.05849 | 0.0119   | *       |
| NADH  | C00004 | NT    | C13-12     | 21 | 12126.67411   | 2057.189079 | 7814.716677 | 1.927842 | 0.8691 | 0.4508   | 2.13444 | 0.97408 | 2.675   | 1.92784 | 0.55323  |         |
| NADH  | C00004 | I3sg2 | C13-12     | 21 | 0             | 0           | 4379.935545 | 1.129138 | 1.9557 | 1.7321   | 0       | 0       | 3.38741 | 1.12914 | 0.55323  |         |
| NADH  | C00004 | NT    | C13-13     | 21 | 0             | 0           | 0           | 0        | 0      | NA       | 0       | 0       | 0       | 0       | 0        | NA      |
| NADH  | C00004 | I3sg2 | C13-13     | 21 | 0             | 0           | 0           | 0        | 0      | NA       | 0       | 0       | 0       | 0       | 0        | NA      |
| NADP+ | C00006 | NT    | C12 PARENT | 21 | 45102.28408   | 14966.78807 | 30033.34009 | 3.896477 | 0.4632 | 0.1189   | 4.06124 | 3.37339 | 4.2548  | 3.89648 | 0.00395  | **      |
| NADP+ | C00006 | I3sg2 | C12 PARENT | 21 | 24456.46294   | 6383.555441 | 3783.749261 | 7.905163 | 1.0661 | 0.1349   | 7.87016 | 8.98834 | 6.85699 | 7.90516 | 0.00395  | **      |
| NADP+ | C00006 | NT    | C13-04     | 21 | 5430.189272   | 2021.900264 | 3738.493186 | 0.491437 | 0.037  | 0.0753   | 0.48896 | 0.45572 | 0.52963 | 0.49144 | 0.17008  |         |
| NADP+ | C00006 | I3sg2 | C13-04     | 21 | 1108.281886   | 1855.806115 | 1003.448555 | 1.595966 | 1.1444 | 0.7171   | 0.35665 | 2.61278 | 1.81847 | 1.59597 | 0.17008  |         |
| NADP+ | C00006 | NT    | C13-05     | 21 | 212050.4372   | 85682.62868 | 136193.4918 | 19.23356 | 0.1211 | 0.0063   | 19.0941 | 19.3121 | 19.2944 | 19.2336 | 9.74E-07 | ***     |
| NADP+ | C00006 | I3sg2 | C13-05     | 21 | 115396.0997   | 25871.60252 | 19846.32274 | 36.50971 | 0.5887 | 0.0161   | 37.1348 | 36.4284 | 35.9659 | 36.5097 | 9.74E-07 | ***     |
| NADP+ | C00006 | NT    | C13-06     | 21 | 9707.074576   | 798.8753448 | 2981.233928 | 0.492161 | 0.3522 | 0.7157   | 0.87407 | 0.18006 | 0.42235 | 0.49216 | 0.17559  |         |
| NADP+ | C00006 | I3sg2 | C13-06     | 21 | 1036.621105   | 0           | 0           | 0.111196 | 0.1926 | 1.7321   | 0.33359 | 0       | 0       | 0.1112  | 0.17559  |         |
| NADP+ | C00006 | NT    | C13-07     | 21 | 11671.01771</ |             |             |          |        |          |         |         |         |         |          |         |

|               |        |       |            |    |             |             |             |          |         |        |         |         |         |         |              |
|---------------|--------|-------|------------|----|-------------|-------------|-------------|----------|---------|--------|---------|---------|---------|---------|--------------|
| NADPH         | C00005 | NT    | C13-09     | 21 | 0           | 2623.333238 | 839.5728335 | 2.37186  | 1.2778  | 0.5387 | 0       | 3.27537 | 1.46835 | 2.37186 | 0.53259      |
| NADPH         | C00005 | I3sg2 | C13-09     | 21 | 1130.865587 | 0           | 0           | 2.264872 | NA      | NA     | 2.26487 | 0       | 0       | 2.26487 | 0.53259      |
| NADPH         | C00005 | NT    | C13-10     | 21 | 0           | 46683.65436 | 34501.02016 | 59.31335 | 1.4515  | 0.0245 | 0       | 58.287  | 60.3397 | 59.3133 | 0.40635      |
| NADPH         | C00005 | I3sg2 | C13-10     | 21 | 23925.0093  | 0           | 0           | 47.91646 | NA      | NA     | 47.9165 | 0       | 0       | 47.9165 | 0.40635      |
| NADPH         | C00005 | NT    | C13-11     | 21 | 0           | 6217.220338 | 5357.206417 | 8.565939 | 1.1362  | 0.1326 | 0       | 7.76253 | 9.36935 | 8.56594 | 0.12969      |
| NADPH         | C00005 | I3sg2 | C13-11     | 21 | 287.312622  | 0           | 0           | 0.575423 | NA      | NA     | 0.57542 | 0       | 0       | 0.57542 | 0.12969      |
| NADPH         | C00005 | NT    | C13-12     | 21 | 0           | 1869.107706 | 1841.080877 | 2.776796 | 0.6267  | 0.2257 | 0       | 2.33368 | 3.21991 | 2.7768  | 0.12615      |
| NADPH         | C00005 | I3sg2 | C13-12     | 21 | 0           | 0           | 0           | 0        | 0       | NA     | NA      | 0       | 0       | 0       | 0.12615      |
| NADPH         | C00005 | NT    | C13-13     | 21 | 0           | 446.4640993 | 196.5598637 | 0.450601 | 0.1511  | 0.3353 | 0       | 0.55743 | 0.34377 | 0.4506  | 0.13798      |
| NADPH         | C00005 | I3sg2 | C13-13     | 21 | 0           | 0           | 0           | 0        | 0       | NA     | NA      | 0       | 0       | 0       | 0.13798      |
| Orotate       | C00295 | NT    | C12 PARENT | 5  | 549053.1506 | 93763.2654  | 797753.3236 | 80.10405 | 9.5865  | 0.1197 | 75.5027 | 91.1237 | 73.6857 | 80.104  | 0.33198      |
| Orotate       | C00295 | I3sg2 | C12 PARENT | 5  | 149319.7257 | 376259.7277 | 523965.75   | 73.90617 | 1.688   | 0.0228 | 75.3118 | 74.3727 | 72.034  | 73.9062 | 0.33198      |
| Orotate       | C00295 | NT    | C13-01     | 5  | 0           | 0           | 0           | 0        | 0       | NA     | 0       | 0       | 0       | 0       | NA           |
| Orotate       | C00295 | I3sg2 | C13-01     | 5  | 0           | 0           | 0           | 0        | 0       | NA     | 0       | 0       | 0       | 0       | NA           |
| Orotate       | C00295 | NT    | C13-02     | 5  | 8855.434837 | 0           | 4098.618383 | 0.532108 | 0.6232  | 1.1712 | 1.21775 | 0       | 0.37858 | 0.53211 | 0.50977      |
| Orotate       | C00295 | I3sg2 | C13-02     | 5  | 0           | 3418.684209 | 0           | 0.225249 | 0.3901  | 1.7321 | 0       | 0.67575 | 0       | 0.22525 | 0.50977      |
| Orotate       | C00295 | NT    | C13-03     | 5  | 169287.9846 | 9133.410385 | 280791.1604 | 19.36385 | 9.1791  | 0.474  | 23.2795 | 8.87629 | 25.9357 | 19.3638 | 0.29498      |
| Orotate       | C00295 | I3sg2 | C13-03     | 5  | 48948.98402 | 126232.6314 | 203421.013  | 25.86859 | 1.8212  | 0.0704 | 24.6882 | 24.9515 | 27.966  | 25.8686 | 0.29498      |
| Orotidine     | X00006 | NT    | C12 PARENT | 10 | 3930276.423 | 3077075.681 | 3049312.442 | 39.97892 | 0.8086  | 0.0202 | 39.0499 | 40.3625 | 40.5244 | 39.9789 | 7.33E-06 *** |
| Orotidine     | X00006 | I3sg2 | C12 PARENT | 10 | 1381921.676 | 1527798.735 | 1514755.417 | 61.15057 | 0.9154  | 0.015  | 61.304  | 60.1681 | 61.9796 | 61.1506 | 7.33E-06 *** |
| Orotidine     | X00006 | NT    | C13-01     | 10 | 0           | 0           | 0           | 0        | 0       | NA     | 0       | 0       | 0       | 0       | NA           |
| Orotidine     | X00006 | I3sg2 | C13-01     | 10 | 0           | 0           | 0           | 0        | 0       | NA     | 0       | 0       | 0       | 0       | NA           |
| Orotidine     | X00006 | NT    | C13-04     | 10 | 99733.59091 | 60438.6763  | 34402.32023 | 0.746966 | 0.2698  | 0.3612 | 0.99092 | 0.79278 | 0.4572  | 0.74697 | 0.22699      |
| Orotidine     | X00006 | I3sg2 | C13-04     | 10 | 0           | 0           | 20856.48616 | 0.284463 | 0.4927  | 1.7321 | 0       | 0       | 0.85339 | 0.28446 | 0.22699      |
| Orotidine     | X00006 | NT    | C13-05     | 10 | 3858315.461 | 2897830.19  | 2856949.189 | 38.10471 | 0.2005  | 0.0053 | 38.3349 | 38.0113 | 37.9679 | 38.1047 | 3.19E-05 *** |
| Orotidine     | X00006 | I3sg2 | C13-05     | 10 | 599490.8418 | 719250.0324 | 667351.6106 | 27.4087  | 0.8702  | 0.0318 | 26.5943 | 28.3257 | 27.3062 | 27.4087 | 3.19E-05 *** |
| Orotidine     | X00006 | NT    | C13-06     | 10 | 174688.5001 | 168613.2685 | 114479.9233 | 1.822925 | 0.3533  | 0.1938 | 1.73564 | 2.21173 | 1.5214  | 1.82292 | 0.00173 **   |
| Orotidine     | X00006 | I3sg2 | C13-06     | 10 | 268.0560385 | 4425.382245 | 7705.67307  | 0.167156 | 0.1518  | 0.9083 | 0.01189 | 0.17428 | 0.31529 | 0.16716 | 0.00173 **   |
| Orotidine     | X00006 | NT    | C13-07     | 10 | 914242.1919 | 652848.402  | 658288.5372 | 8.798519 | 0.2636  | 0.03   | 9.08359 | 8.56352 | 8.74844 | 8.79852 | 0.01039 **   |
| Orotidine     | X00006 | I3sg2 | C13-07     | 10 | 147083.5637 | 154085.3646 | 105055.8974 | 5.630552 | 1.1759  | 0.2088 | 6.52484 | 6.06822 | 4.29859 | 5.63055 | 0.01039 **   |
| Orotidine     | X00006 | NT    | C13-08     | 10 | 855951.971  | 580199.5158 | 614526.142  | 8.093957 | 0.4514  | 0.0558 | 8.50444 | 7.61057 | 8.16685 | 8.09396 | 0.00062 ***  |
| Orotidine     | X00006 | I3sg2 | C13-08     | 10 | 125445.8806 | 133657.7961 | 128233.9549 | 5.358559 | 0.1789  | 0.0334 | 5.56496 | 5.26374 | 5.24698 | 5.35856 | 0.00062 ***  |
| Orotidine     | X00006 | NT    | C13-09     | 10 | 231554.5152 | 186592.1556 | 196678.9136 | 2.454002 | 0.1567  | 0.0638 | 2.30065 | 2.44756 | 2.6138  | 2.454   | 1.10E-05 *** |
| Orotidine     | X00006 | I3sg2 | C13-09     | 10 | 0           | 0           | 0           | 0        | 0       | NA     | 0       | 0       | 0       | 0       | 1.10E-05 *** |
| P-Creatine    | C02305 | NT    | C12 PARENT | 4  | 7719823.298 | 5598284.523 | 5267442.245 | 96.64185 | 0.1248  | 0.0013 | 96.7277 | 96.4987 | 96.6991 | 96.6419 | 0.00034 ***  |
| P-Creatine    | C02305 | I3sg2 | C12 PARENT | 4  | 5568167.243 | 7424056.15  | 7773537.674 | 99.06916 | 0.3479  | 0.0035 | 98.6705 | 99.3116 | 99.2254 | 99.0692 | 0.00034 ***  |
| P-Creatine    | C02305 | NT    | C13-01     | 4  | 0           | 0           | 0           | 0        | 0       | NA     | 0       | 0       | 0       | 0       | NA           |
| P-Creatine    | C02305 | I3sg2 | C13-01     | 4  | 0           | 0           | 0           | 0        | 0       | NA     | 0       | 0       | 0       | 0       | NA           |
| P-Creatine    | C02305 | NT    | C13-02     | 4  | 261163.1878 | 203123.0336 | 179805.6743 | 3.358147 | 0.1248  | 0.0372 | 3.27232 | 3.50127 | 3.30085 | 3.35815 | 0.00034 ***  |
| P-Creatine    | C02305 | I3sg2 | C13-02     | 4  | 75025.31809 | 51462.01924 | 60685.48562 | 0.930837 | 0.3479  | 0.3738 | 1.32948 | 0.68841 | 0.77462 | 0.93084 | 0.00034 ***  |
| P-Ser         | C01005 | NT    | C12 PARENT | 3  | 333869.2473 | 271392.7644 | 275905.2986 | 100      | 0       | 0      | 100     | 100     | 100     | 100     | NA           |
| P-Ser         | C01005 | I3sg2 | C12 PARENT | 3  | 115925.328  | 121519.5251 | 135731.1334 | 100      | 0       | 0      | 100     | 100     | 100     | 100     | NA           |
| PEP           | C00074 | NT    | C12 PARENT | 3  | 17207.28415 | 57845.30121 | 24400.04044 | 49.6151  | 38.9623 | 0.7853 | 4.64847 | 73.3496 | 70.8473 | 49.6151 | 0.58165      |
| PEP           | C00074 | I3sg2 | C12 PARENT | 3  | 39780.09323 | 0           | 23704.63179 | 29.10512 | 44.7569 | 1.5378 | 80.6422 | 0       | 6.6732  | 29.1051 | 0.58165      |
| PEP           | C00074 | NT    | C13-03     | 3  | 352963.8667 | 21017.18412 | 10040.30403 | 50.3849  | 38.9623 | 0.7733 | 95.3515 | 26.6504 | 29.1527 | 50.3849 | 0.58165      |
| PEP           | C00074 | I3sg2 | C13-03     | 3  | 9549.052243 | 481936.8486 | 331516.6039 | 70.89488 | 44.7569 | 0.6313 | 19.3578 | 100     | 93.3268 | 70.8949 | 0.58165      |
| Pro           | C00148 | NT    | C12 PARENT | 5  | 136010322.5 | 281272965.6 | 262603013.7 | 77.69581 | 0.4528  | 0.0058 | 77.2045 | 77.7866 | 78.0964 | 77.6958 | 0.00266 **   |
| Pro           | C00148 | I3sg2 | C12 PARENT | 5  | 72771935.93 | 146915559.2 | 134546210.8 | 84.48372 | 1.7103  | 0.0202 | 82.8981 | 84.2571 | 86.296  | 84.4837 | 0.00266 **   |
| Pro           | C00148 | NT    | C13-01     | 5  | 3475451.141 | 6783876.627 | 6697931.762 | 1.946936 | 0.0621  | 0.0319 | 1.97279 | 1.87609 | 1.99192 | 1.94694 | 0.52871      |
| Pro           | C00148 | I3sg2 | C13-01     | 5  | 1765665.919 | 3774321.435 | 1097921.1   | 1.626716 | 0.8026  | 0.4934 | 2.01136 | 2.1646  | 0.70419 | 1.62672 | 0.52871      |
| Pro           | C00148 | NT    | C13-03     | 5  | 10961552.78 | 23367701.97 | 21334228.93 | 6.343074 | 0.1201  | 0.0189 | 6.22218 | 6.46238 | 6.34466 | 6.34307 | 0.00382 **   |
| Pro           | C00148 | I3sg2 | C13-03     | 5  | 4653706.671 | 8120389.84  | 7036443.303 | 4.823813 | 0.4197  | 0.087  | 5.30126 | 4.6571  | 4.51307 | 4.82381 | 0.00382 **   |
| Pro           | C00148 | NT    | C13-04     | 5  | 15975067.84 | 30530107.16 | 27813718.86 | 8.594271 | 0.4192  | 0.0488 | 9.06804 | 8.44316 | 8.27161 | 8.59427 | 0.00094 ***  |
| Pro           | C00148 | I3sg2 | C13-04     | 5  | 5508836.026 | 10174627.84 | 8794990.541 | 5.917195 | 0.325   | 0.0549 | 6.27538 | 5.83522 | 5.64098 | 5.91719 | 0.00094 ***  |
| Pro           | C00148 | NT    | C13-05     | 5  | 9746587.857 | 19641031.57 | 17806165.96 | 5.419908 | 0.119   | 0.022  | 5.53252 | 5.43177 | 5.29543 | 5.41991 | 0.00039 ***  |
| Pro           | C00148 | I3sg2 | C13-05     | 5  | 3084692.553 | 5380889.787 | 4436895.721 | 3.148554 | 0.3384  | 0.1075 | 3.51392 | 3.08598 | 2.84576 | 3.14855 | 0.00039 ***  |
| Propanoyl-CoA | C00100 | NT    | C12 PARENT | 24 | 3955.164866 | 84.9121385  | 3175.947621 | 15.9683  | 2.3343  | 0.1462 | 17.4158 | 13.2754 | 17.2137 | 15.9683 | 0.04359 **   |
| Propanoyl-CoA | C00100 | I3sg2 | C12 PARENT | 24 | 3202.020546 | 4512.53792  | 1636.673633 | 34.482   | 10.7613 | 0.3121 | 41.2604 | 40.112  | 22.0736 | 34.482  | 0.04359 **   |
| Propanoyl-CoA | C00100 | NT    | C13-05     | 24 | 15977.98551 | 4856.920527 | 13521.8923  | 73.40987 | 3.1162  | 0.0424 | 70.356  | 76.5848 | 73.2889 | 73.4099 | 0.2631       |
| Propanoyl-CoA | C00100 | I3sg2 | C13-05     | 24 | 4558.499084 | 6170.00104  | 5777.958048 | 63.8371  | 12.5611 | 0.1936 | 58.7396 | 54.8453 | 77.9264 | 63.8371 | 0.2631       |
| Propanoyl-CoA | C00100 | NT    | C13-06     | 24 | 2777.06153  | 643.054555  | 1752.287872 | 10.62183 | 1.4278  | 0.1344 | 12.2283 | 10.1398 | 9.49743 | 10.6218 | 0.0088 **    |
| Propanoyl-CoA | C00100 | I3sg2 | C13-06     | 24 | 0           | 567.2949459 | 0           | 1.680899 | 2.9114  | 1.7321 | 0       | 5.0427  | 0       | 1.6809  | 0.0088 **    |
| S7P           | C05382 | NT    | C12 PARENT | 7  | 0           | 16712.42352 | 0           | 1.713823 | 2.9684  | 1.7321 | 0       | 5.14147 | 0       | 1.71382 | 0.02755 **   |
| S7P           | C05382 | I3sg2 | C12 PARENT | 7  | 63357.14482 | 21710.69007 | 73571.00172 | 21.17172 | 9.49    | 0.4482 | 25.1384 | 10.342  | 28.0347 | 21.1717 | 0.02755 **   |
| S7P           | C05382 | NT    | C13-07     | 7  | 337053.7786 | 308339.0636 | 415717.0208 | 98.2818  | 2.9684  | 0.0302 | 100     | 94.8585 | 100     | 98.2862 | 0.02755 **   |
| S7P           | C05382 | I3sg2 | C13-07     | 7  | 188675.8189 | 188216.5074 | 188857.0853 | 78.82828 | 9.49    | 0.1204 | 74.8616 | 89.658  | 71.9653 | 78.8283 | 0.02755 **   |
| SAM           | C00019 | NT    | C12 PARENT | 15 | 1103039.072 | 827596.9461 | 919892.1433 | 11.34093 | 0.2787  | 0.0246 | 11.0327 | 11.5754 | 11.4147 | 11.3409 | 7.86E-07 *** |
| SAM           | C00019 | I3sg2 | C12 PARENT | 15 | 910304.2508 | 1473277.91  | 1512450.178 | 25.96704 | 0.3935  | 0.0152 | 25.6778 | 25.8082 | 26.4152 | 25.967  | 7.86E-07 *** |
| SAM           | C00019 | NT    | C13-01     | 15 | 0           | 0           | 0           | 0        | 0       | NA     | 0       | 0       | 0       | 0       | NA           |
| SAM           | C00019 | I3sg2 | C13-01     | 15 | 0           | 0           | 0           | 0        | 0       | NA     | 0       | 0       | 0       | 0       | NA           |
| SAM           | C00019 | NT    | C13-02     | 15 | 11521.89906 | 11748.02326 | 6540.168714 | 0.120238 | 0.0418  | 0.3477 | 0.11524 | 0.16432 | 0.08116 | 0.12024 | 0.00759 **   |
| SAM           | C00019 | I3sg2 | C13-02     | 15 | 0           | 0           | 0           | 0        | 0       | NA     | 0       | 0       | 0       | 0       | 0.00759 **   |
| SAM           | C00019 | NT    | C13-03     | 15 | 95567.00488 | 73332.62102 | 85169.1669  | 1.012799 | 0.0517  | 0.051  | 0.95587 | 1.02568 | 1.05684 |         |              |



|              |        |       |            |    |             |              |              |          |         |         |         |         |           |         |              |
|--------------|--------|-------|------------|----|-------------|--------------|--------------|----------|---------|---------|---------|---------|-----------|---------|--------------|
| Sorbitol     | C00794 | I3sg2 | C12 PARENT | 6  | 56007017.4  | 51552694.95  | 43401682     | 99.48357 | 0.1509  | 0.0015  | 99.6486 | 99.3525 | 99.4497   | 99.4836 | 0.08155      |
| Sorbitol     | C00794 | NT    | C13-01     | 6  | 0           | 0            | 0            | 0        | 0       | NA      | 0       | 0       | 0         | 0       | NA           |
| Sorbitol     | C00794 | I3sg2 | C13-01     | 6  | 0           | 0            | 0            | 0        | 0       | NA      | 0       | 0       | 0         | 0       | NA           |
| Sorbitol     | C00794 | NT    | C13-06     | 6  | 455863.4205 | 505944.7302  | 508909.4352  | 0.988119 | 0.3189  | 0.3228  | 0.70036 | 0.93295 | 1.33105   | 0.98812 | 0.08155      |
| Sorbitol     | C00794 | I3sg2 | C13-06     | 6  | 197523.5273 | 336003.2056  | 240169.5857  | 0.516434 | 0.1509  | 0.2923  | 0.35144 | 0.64755 | 0.55032   | 0.51643 | 0.08155      |
| Succ         | C00042 | NT    | C12 PARENT | 4  | 1856443.661 | 1749518.206  | 1568777.467  | 69.107   | 2.7779  | 0.0402  | 70.1427 | 65.9601 | 71.2183   | 69.107  | 0.0105 *     |
| Succ         | C00042 | I3sg2 | C12 PARENT | 4  | 1748343.847 | 1731113.494  | 2141830.114  | 81.9678  | 4.0451  | 0.0494  | 79.2061 | 80.0863 | 86.611    | 81.9678 | 0.0105 *     |
| Succ         | C00042 | NT    | C13-01     | 4  | 0           | 12866.03266  | 44981.46022  | 0.84237  | 1.0669  | 1.2665  | 0       | 0.48507 | 2.04204   | 0.84237 | 0.67176      |
| Succ         | C00042 | I3sg2 | C13-01     | 4  | 3865.199813 | 28805.44495  | 0            | 0.502577 | 0.7242  | 1.4409  | 0.17511 | 1.33262 | 0         | 0.50258 | 0.67176      |
| Succ         | C00042 | NT    | C13-02     | 4  | 429515.2905 | 508843.5269  | 334193.2741  | 16.86145 | 2.08    | 0.1234  | 16.2285 | 19.1843 | 15.1715   | 16.8614 | 0.04787 *    |
| Succ         | C00042 | I3sg2 | C13-02     | 4  | 289787.6908 | 257495.0815  | 178279.6496  | 10.75004 | 3.1261  | 0.29025 | 13.1284 | 11.9245 | 12.720925 | 10.75   | 0.04787 *    |
| Succ         | C00042 | NT    | C13-03     | 4  | 240346.8043 | 216848.5124  | 143854.8815  | 7.929107 | 1.293   | 0.1631  | 9.08111 | 8.17559 | 6.53062   | 7.92911 | 0.00906 **   |
| Succ         | C00042 | I3sg2 | C13-03     | 4  | 94427.8056  | 99563.44664  | 95495.95623  | 4.248551 | 0.3731  | 0.0878  | 4.27791 | 4.60609 | 3.86165   | 4.24855 | 0.00906 **   |
| Succ         | C00042 | NT    | C13-04     | 4  | 120362.3732 | 164313.6332  | 110967.1204  | 5.260076 | 0.8459  | 0.1608  | 4.54769 | 6.19493 | 5.03761   | 5.26008 | 0.01043 *    |
| Succ         | C00042 | I3sg2 | C13-04     | 4  | 70910.14675 | 44582.65878  | 57325.01078  | 2.531034 | 0.6038  | 0.2386  | 3.21248 | 2.06252 | 2.3181    | 2.53103 | 0.01043 *    |
| Succinyl-CoA | C00091 | NT    | C12 PARENT | 25 | 3683.568186 | 398.0889308  | 2173.385311  | 12.51194 | 1.2084  | 0.0966  | 12.3903 | 13.7765 | 11.369    | 12.5119 | 0.00036 ***  |
| Succinyl-CoA | C00091 | I3sg2 | C12 PARENT | 25 | 1956.935273 | 4772.094458  | 6001.986216  | 33.77916 | 3.0467  | 0.0902  | 31.3904 | 32.7367 | 37.2103   | 33.7792 | 0.00036 ***  |
| Succinyl-CoA | C00091 | NT    | C13-05     | 25 | 17128.29141 | 2425.628231  | 13249.32285  | 70.28802 | 13.1918 | 0.1877  | 57.614  | 83.9428 | 69.3073   | 70.288  | 0.25152      |
| Succinyl-CoA | C00091 | I3sg2 | C13-05     | 25 | 3997.308476 | 8629.093293  | 8913.902111  | 59.52613 | 4.4373  | 0.0745  | 64.1193 | 59.1959 | 55.2632   | 59.5261 | 0.25152      |
| Succinyl-CoA | C00091 | NT    | C13-06     | 25 | 5372.424205 | 65.90290746  | 2697.025721  | 11.48664 | 8.2151  | 0.7152  | 18.0711 | 2.28068 | 14.1082   | 11.4866 | 0.23155      |
| Succinyl-CoA | C00091 | I3sg2 | C13-06     | 25 | 0           | 703.5553261  | 1214.018016  | 4.11764  | 3.813   | 0.926   | 0       | 4.82642 | 7.5265    | 4.11764 | 0.23155      |
| Succinyl-CoA | C00091 | NT    | C13-07     | 25 | 3545.130005 | 0            | 997.0466144  | 5.713404 | 5.9779  | 1.0463  | 11.9247 | 0       | 5.21556   | 5.7134  | 0.44456      |
| Succinyl-CoA | C00091 | I3sg2 | C13-07     | 25 | 279.9306369 | 472.4358359  | 0            | 2.577063 | 2.3176  | 0.8993  | 4.49026 | 3.24093 | 0         | 2.57706 | 0.44456      |
| UDP          | C00015 | NT    | C12 PARENT | 9  | 389420.254  | 123100.1436  | 347294.6949  | 5.824984 | 0.3776  | 0.0648  | 5.87419 | 5.42522 | 6.17555   | 5.82498 | 8.11E-06 *** |
| UDP          | C00015 | I3sg2 | C12 PARENT | 9  | 1464429.654 | 2593732.489  | 2492555.409  | 39.72346 | 1.97    | 0.0496  | 37.4533 | 40.983  | 40.7341   | 39.7235 | 8.11E-06 *** |
| UDP          | C00015 | NT    | C13-01     | 9  | 646.4970974 | 0            | 11015.84304  | 0.068545 | 0.1104  | 1.6104  | 0.00975 | 0       | 0.19588   | 0.06854 | 0.34268      |
| UDP          | C00015 | I3sg2 | C13-01     | 9  | 0           | 0            | 0            | 0        | 0       | NA      | 0       | 0       | 0         | 0       | 0.34268      |
| UDP          | C00015 | NT    | C13-02     | 9  | 10982.51509 | 0            | 23273.86814  | 0.193173 | 0.2083  | 1.0783  | 0.16567 | 0       | 0.41385   | 0.19317 | 0.18348      |
| UDP          | C00015 | I3sg2 | C13-02     | 9  | 0           | 0            | 0            | 0        | 0       | NA      | 0       | 0       | 0         | 0       | 0.18348      |
| UDP          | C00015 | NT    | C13-03     | 9  | 51907.36787 | 8516.483797  | 21616.12595  | 0.514235 | 0.2328  | 0.4527  | 0.78299 | 0.37533 | 0.38437   | 0.51423 | 0.58841      |
| UDP          | C00015 | I3sg2 | C13-03     | 9  | 11101.69646 | 9873.433133  | 44048.41109  | 0.386597 | 0.2956  | 0.7646  | 0.28393 | 0.15601 | 0.71985   | 0.3866  | 0.58841      |
| UDP          | C00015 | NT    | C13-04     | 9  | 63404.84758 | 36224.56336  | 118983.8489  | 1.556218 | 0.5807  | 0.3732  | 0.95643 | 1.59647 | 2.11575   | 1.55622 | 0.08214      |
| UDP          | C00015 | I3sg2 | C13-04     | 9  | 2198.726075 | 68065.40472  | 26424.45766  | 0.521185 | 0.5155  | 0.989   | 0.05623 | 1.07549 | 0.43184   | 0.52119 | 0.08214      |
| UDP          | C00015 | NT    | C13-05     | 9  | 3791799.358 | 1357695.841  | 3180586.112  | 57.86324 | 1.738   | 0.03    | 57.1972 | 59.8358 | 56.5567   | 57.8632 | 0.00051 ***  |
| UDP          | C00015 | I3sg2 | C13-05     | 9  | 1696480.704 | 2463506.511  | 2496269.356  | 41.03606 | 2.2411  | 0.0546  | 43.3881 | 38.9253 | 40.7948   | 41.0361 | 0.00051 ***  |
| UDP          | C00015 | NT    | C13-06     | 9  | 603470.6813 | 183771.5756  | 587137.92556 | 9.214176 | 1.1746  | 0.1275  | 9.10302 | 8.0991  | 10.4404   | 9.21418 | 0.00398 **   |
| UDP          | C00015 | I3sg2 | C13-06     | 9  | 208883.4525 | 320556.6945  | 296582.1903  | 5.084715 | 0.2483  | 0.0488  | 5.34226 | 5.06505 | 4.84684   | 5.08472 | 0.00398 **   |
| UDP          | C00015 | NT    | C13-07     | 9  | 1114111.969 | 311346.0764  | 838913.3304  | 15.14824 | 1.555   | 0.1027  | 16.8058 | 13.7215 | 14.9174   | 15.1482 | 0.00242 **   |
| UDP          | C00015 | I3sg2 | C13-07     | 9  | 340874.025  | 558303.7531  | 503671.062   | 8.724556 | 0.4967  | 0.0569  | 8.71797 | 9.22456 | 8.23114   | 8.72456 | 0.00242 **   |
| UDP          | C00015 | NT    | C13-08     | 9  | 603601.5689 | 248381.3035  | 494886.9998  | 9.617188 | 1.1613  | 0.1208  | 9.105   | 10.9466 | 8.80001   | 9.61719 | 0.00177 **   |
| UDP          | C00015 | I3sg2 | C13-08     | 9  | 186049.4533 | 289261.8087  | 259537.8135  | 4.523428 | 0.2616  | 0.0578  | 4.75828 | 4.57056 | 4.24145   | 4.52343 | 0.00177 **   |
| UDP-GlcNac   | C00043 | NT    | C12 PARENT | 17 | 485555.1709 | 454148.147   | 563643.345   | 2.237314 | 0.3861  | 0.1726  | 2.08049 | 1.95426 | 2.67719   | 2.23731 | 4.68E-05 *** |
| UDP-GlcNac   | C00043 | I3sg2 | C12 PARENT | 17 | 1104831.857 | 1121655.172  | 1131998.421  | 8.76409  | 0.4594  | 0.0524  | 9.28987 | 8.44061 | 8.56179   | 8.76409 | 4.68E-05 *** |
| UDP-GlcNac   | C00043 | NT    | C13-01     | 17 | 0           | 0            | 0            | 0        | 0       | NA      | 0       | 0       | 0         | 0       | NA           |
| UDP-GlcNac   | C00043 | I3sg2 | C13-01     | 17 | 0           | 0            | 0            | 0        | 0       | NA      | 0       | 0       | 0         | 0       | NA           |
| UDP-GlcNac   | C00043 | NT    | C13-02     | 17 | 42417.21968 | 66664.94688  | 58242.73432  | 0.248419 | 0.058   | 0.2333  | 0.18175 | 0.28687 | 0.27664   | 0.24842 | 0.00529 **   |
| UDP-GlcNac   | C00043 | I3sg2 | C13-02     | 17 | 148842.3967 | 119595.1102  | 109425.6345  | 0.993043 | 0.2268  | 0.2283  | 1.25153 | 0.89997 | 0.82763   | 0.99304 | 0.00529 **   |
| UDP-GlcNac   | C00043 | NT    | C13-04     | 17 | 101076.7857 | 46946.10529  | 33890.50389  | 0.26536  | 0.1467  | 0.5528  | 0.43309 | 0.20202 | 0.16097   | 0.26536 | 0.67093      |
| UDP-GlcNac   | C00043 | I3sg2 | C13-04     | 17 | 62785.02915 | 0            | 0            | 0.175974 | 0.3048  | 1.7321  | 0.52792 | 0       | 0         | 0.17597 | 0.67093      |
| UDP-GlcNac   | C00043 | NT    | C13-05     | 17 | 2251487.246 | 2456076.207  | 1994467.825  | 9.896418 | 0.5888  | 0.0595  | 9.64711 | 10.5688 | 9.4733    | 9.89642 | 0.00235 **   |
| UDP-GlcNac   | C00043 | I3sg2 | C13-05     | 17 | 755551.9129 | 851575.9596  | 969696.8506  | 6.698481 | 0.5513  | 0.0823  | 6.35299 | 6.40823 | 7.33423   | 6.69848 | 0.00235 **   |
| UDP-GlcNac   | C00043 | NT    | C13-06     | 17 | 928262.3478 | 945296.5074  | 1026430.746  | 4.306822 | 0.4944  | 0.1148  | 3.97739 | 4.06774 | 4.87533   | 4.30682 | 0.00035 ***  |
| UDP-GlcNac   | C00043 | I3sg2 | C13-06     | 17 | 1998165.949 | 2688456.853  | 2199971.436  | 17.89057 | 2.0285  | 0.1134  | 16.8014 | 20.231  | 16.6393   | 17.8906 | 0.00035 ***  |
| UDP-GlcNac   | C00043 | NT    | C13-07     | 17 | 922403.2113 | 9191871.6458 | 722534.8907  | 3.884113 | 0.4223  | 0.1087  | 3.95229 | 4.26816 | 3.43189   | 3.88411 | 0.12583      |
| UDP-GlcNac   | C00043 | I3sg2 | C13-07     | 17 | 269954.1737 | 230061.3818  | 502220.6696  | 2.599879 | 1.0724  | 0.4125  | 2.26988 | 1.73124 | 3.79851   | 2.59988 | 0.12583      |
| UDP-GlcNac   | C00043 | NT    | C13-08     | 17 | 1077562.134 | 1068718.904  | 950924.7636  | 4.577549 | 0.535   | 0.0117  | 4.61711 | 4.59885 | 4.51669   | 4.57755 | 4.86E-06 *** |
| UDP-GlcNac   | C00043 | I3sg2 | C13-08     | 17 | 1954525.123 | 2136946.621  | 2286454.698  | 16.6029  | 0.6236  | 0.0376  | 16.4344 | 16.0808 | 17.2934   | 16.6029 | 4.86E-06 *** |
| UDP-GlcNac   | C00043 | NT    | C13-09     | 17 | 253296.8874 | 290605.6502  | 239063.2639  | 1.157112 | 0.0847  | 0.0732  | 1.08532 | 1.25052 | 1.1355    | 1.15711 | 0.10658      |
| UDP-GlcNac   | C00043 | I3sg2 | C13-09     | 17 | 36536.09985 | 84175.50108  | 143876.2751  | 0.67628  | 0.3923  | 0.58    | 0.30721 | 0.63343 | 1.0882    | 0.67628 | 0.10658      |
| UDP-GlcNac   | C00043 | NT    | C13-10     | 17 | 383896.1753 | 437731.1176  | 394536.3251  | 1.80083  | 0.1351  | 0.075   | 1.64491 | 1.88362 | 1.87396   | 1.80083 | 0.0067 **    |
| UDP-GlcNac   | C00043 | I3sg2 | C13-10     | 17 | 106980.995  | 90747.10888  | 19215.06923  | 0.575919 | 0.3883  | 0.6743  | 0.89954 | 0.68288 | 0.14533   | 0.57592 | 0.0067 **    |
| UDP-GlcNac   | C00043 | NT    | C13-11     | 17 | 4706521.595 | 4990949.517  | 4546592.485  | 21.07949 | 0.793   | 0.0376  | 20.1664 | 21.4768 | 21.5953   | 21.0795 | 0.00359 **   |
| UDP-GlcNac   | C00043 | I3sg2 | C13-11     | 17 | 2037395.823 | 2368894.083  | 2402080.477  | 17.70849 | 0.5283  | 0.0298  | 17.1312 | 17.8263 | 18.168    | 17.7085 | 0.00359 **   |
| UDP-GlcNac   | C00043 | NT    | C13-12     | 17 | 1228419.029 | 814766.534   | 912690.2735  | 4.368212 | 0.8792  | 0.2013  | 5.2635  | 3.50606 | 4.33508   | 4.36821 | 0.04536 *    |
| UDP-GlcNac   | C00043 | I3sg2 | C13-12     | 17 | 373898.4772 | 369873.3797  | 340391.8737  | 2.839322 | 0.288   | 0.1016  | 3.14389 | 2.78335 | 2.57453   | 2.83932 | 0.04536 *    |
| UDP-GlcNac   | C00043 | NT    | C13-13     | 17 | 6284950.038 | 6375121.793  | 5231027.786  | 26.40297 | 1.3714  | 0.0519  | 26.9296 | 27.433  | 24.8463   | 26.403  | 0.00029 ***  |
| UDP-GlcNac   | C00043 | I3sg2 | C13-13     | 17 | 1806706.73  | 2129070.338  | 1876370.978  | 15.13495 | 0.9162  | 0.0605  | 15.1915 | 16.0215 | 14.1918   | 15.135  | 0.00029 ***  |
| UDP-GlcNac   | C00043 | NT    | C13-14     | 17 | 1765901.981 | 1556230.944  | 1771334.966  | 7.558878 | 0.8584  | 0.1136  | 7.56649 | 6.96668 | 8.41346   | 7.55888 | 0.00648 **   |
| UDP-GlcNac   | C00043 | I3sg2 | C13-14     | 17 | 462580.2985 | 403976.6588  |              |          |         |         |         |         |           |         |              |

|     |        |       |        |   |             |             |             |          |        |        |         |         |         |         |          |     |
|-----|--------|-------|--------|---|-------------|-------------|-------------|----------|--------|--------|---------|---------|---------|---------|----------|-----|
| UTP | C00075 | NT    | C13-05 | 9 | 6852619.649 | 2989903.58  | 4550828.829 | 58.08447 | 2.2422 | 0.0386 | 56.7477 | 56.8326 | 60.6731 | 58.0845 | 0.00047  | *** |
| UTP | C00075 | I3sg2 | C13-05 | 9 | 1677815.88  | 2710819.829 | 2359285.9   | 39.45904 | 2.1216 | 0.0538 | 40.7539 | 40.6126 | 37.0106 | 39.459  | 0.00047  | *** |
| UTP | C00075 | NT    | C13-06 | 9 | 1177755.966 | 544624.6482 | 724069.1742 | 9.91968  | 0.378  | 0.0381 | 9.7532  | 10.3523 | 9.65352 | 9.91968 | 0.00013  | *** |
| UTP | C00075 | I3sg2 | C13-06 | 9 | 225414.8834 | 397993.9155 | 385774.2355 | 5.829877 | 0.3103 | 0.0532 | 5.4753  | 5.96261 | 6.05172 | 5.82988 | 0.00013  | *** |
| UTP | C00075 | NT    | C13-07 | 9 | 1955449.048 | 808024.1969 | 1169166.815 | 15.71339 | 0.4311 | 0.0274 | 16.1934 | 15.3591 | 15.5877 | 15.7134 | 1.57E-05 | *** |
| UTP | C00075 | I3sg2 | C13-07 | 9 | 364979.767  | 570818.5829 | 534107.1696 | 8.598592 | 0.2467 | 0.0287 | 8.86531 | 8.55181 | 8.37865 | 8.59859 | 1.57E-05 | *** |
| UTP | C00075 | NT    | C13-08 | 9 | 1188617.809 | 460994.989  | 532050.1869 | 8.566428 | 1.3853 | 0.1617 | 9.84315 | 8.76267 | 7.09346 | 8.56643 | 0.00858  | **  |
| UTP | C00075 | I3sg2 | C13-08 | 9 | 198576.8019 | 290521.5567 | 304545.2068 | 4.651122 | 0.2596 | 0.0558 | 4.82341 | 4.35249 | 4.77747 | 4.65112 | 0.00858  | **  |

Abundance

| Name          | KEGG.ID | Condition | Av          | Std         | CV      | Exp001    | Exp002    | Exp003    | ANOVA   | Sig | Av2         | denom       | Norm_Av   | Norm_Std |
|---------------|---------|-----------|-------------|-------------|---------|-----------|-----------|-----------|---------|-----|-------------|-------------|-----------|----------|
| ADP           | C00008  | NT2       | 29687814.67 | 2747385.312 | 0.09254 | 31571368  | 30956761  | 26535315  | 0.00567 | **  | 29687814.67 | 17474110    | 1.69896   | 0.15723  |
| ADP           | C00008  | I3sg5     | 17474110    | 2787412.287 | 0.15952 | 17741290  | 20118312  | 14562728  | 0.00567 | **  | 17474110    | 17474110    | 1         | 0.15952  |
| Ala           | C00041  | NT2       | 20530081.67 | 3352270.196 | 0.16329 | 22902725  | 21992465  | 16695055  | 0.02415 | *   | 20530081.67 | 12259519.33 | 1.6746237 | 0.27344  |
| Ala           | C00041  | I3sg5     | 12259519.33 | 2279303.992 | 0.18592 | 10058225  | 14609548  | 12110785  | 0.02415 | *   | 12259519.33 | 12259519.33 | 1         | 0.18592  |
| AMP           | C00020  | NT2       | 22652352.33 | 2011770.744 | 0.08881 | 23928430  | 23695367  | 20333260  | 0.03864 | *   | 22652352.33 | 13814123.67 | 1.6397966 | 0.14563  |
| AMP           | C00020  | I3sg5     | 13814123.67 | 4627504.037 | 0.33498 | 11210192  | 19156937  | 11075242  | 0.03864 | *   | 13814123.67 | 13814123.67 | 1         | 0.33498  |
| Asp           | C00049  | NT2       | 47838155.67 | 5689769.478 | 0.11894 | 52393660  | 49660283  | 41460524  | 0.00624 | **  | 47838155.67 | 27266563    | 1.7544623 | 0.20867  |
| Asp           | C00049  | I3sg5     | 27266563    | 3670691.569 | 0.13462 | 23802892  | 31114105  | 26882692  | 0.00624 | **  | 27266563    | 27266563    | 1         | 0.13462  |
| ATP           | C00002  | NT2       | 60887045    | 6077458.213 | 0.09982 | 67466606  | 55483611  | 59710918  | 0.00446 | **  | 60887045    | 32744685.33 | 1.8594482 | 0.1856   |
| ATP           | C00002  | I3sg5     | 32744685.33 | 5854785.413 | 0.1788  | 35604530  | 36619900  | 26009626  | 0.00446 | **  | 32744685.33 | 32744685.33 | 1         | 0.1788   |
| Carnitine     | C00318  | NT2       | 4201218.333 | 443087.1715 | 0.10547 | 4512842   | 4396824   | 3693989   | 0.02801 | *   | 4201218.333 | 2472379.667 | 1.699261  | 0.17921  |
| Carnitine     | C00318  | I3sg5     | 2472379.667 | 769774.7345 | 0.31135 | 1795014   | 3309495   | 2312630   | 0.02801 | *   | 2472379.667 | 2472379.667 | 1         | 0.31135  |
| CDP           | C00112  | NT2       | 2391516.333 | 155556.8143 | 0.06505 | 2570124   | 2285708   | 2318717   | 0.00078 | *** | 2391516.333 | 1405581.667 | 1.7014425 | 0.11067  |
| CDP           | C00112  | I3sg5     | 1405581.667 | 101731.1533 | 0.07238 | 1429989   | 1492889   | 1293867   | 0.00078 | *** | 1405581.667 | 1405581.667 | 1         | 0.07238  |
| Cit           | C00158  | NT2       | 111904613.3 | 11694657.29 | 0.10451 | 125395932 | 104655715 | 105662193 | 0.01512 | *   | 111904613.3 | 77565258    | 1.4427157 | 0.15077  |
| Cit           | C00158  | I3sg5     | 77565258    | 8711735.455 | 0.11231 | 77049712  | 86523318  | 69122744  | 0.01512 | *   | 77565258    | 77565258    | 1         | 0.11231  |
| CoA           | C00010  | NT2       | 297851.3333 | 34540.56057 | 0.11597 | 323707    | 311223    | 258624    | 0.01409 | *   | 297851.3333 | 176716      | 1.6854803 | 0.19546  |
| CoA           | C00010  | I3sg5     | 176716      | 36674.50148 | 0.20753 | 162794    | 218313    | 149041    | 0.01409 | *   | 176716      | 176716      | 1         | 0.20753  |
| CTP           | C00063  | NT2       | 2558552.667 | 192417.2111 | 0.07521 | 2780586   | 2454267   | 2440445   | 0.01719 | *   | 2558552.667 | 1589672.333 | 1.6094843 | 0.12104  |
| CTP           | C00063  | I3sg5     | 1589672.333 | 381919.4769 | 0.24025 | 1791551   | 1828286   | 149180    | 0.01719 | *   | 1589672.333 | 1589672.333 | 1         | 0.24025  |
| Cystathionine | C02291  | NT2       | 1020551     | 221656.1002 | 0.21719 | 1218156   | 1062623   | 780874    | 0.0495  | *   | 1020551     | 662197.6667 | 1.5411577 | 0.33473  |
| Cystathionine | C02291  | I3sg5     | 662197.6667 | 22195.64111 | 0.03352 | 636786    | 672017    | 677790    | 0.0495  | *   | 662197.6667 | 662197.6667 | 1         | 0.03352  |
| F16BP         | C00354  | NT2       | 1171676.333 | 236517.525  | 0.20186 | 1396353   | 1193803   | 924873    | 0.01606 | *   | 1171676.333 | 579557      | 2.0216758 | 0.4081   |
| F16BP         | C00354  | I3sg5     | 579557      | 98143.33663 | 0.16934 | 552969    | 688255    | 497447    | 0.01606 | *   | 579557      | 579557      | 1         | 0.16934  |
| GABA          | C00334  | NT2       | 4237106     | 382806.3826 | 0.09035 | 4583614   | 382616    | 4301528   | 0.00971 | **  | 4237106     | 3001807     | 1.4115185 | 0.12753  |
| GABA          | C00334  | I3sg5     | 3001807     | 256515.5015 | 0.08545 | 3023017   | 3247059   | 2735345   | 0.00971 | **  | 3001807     | 3001807     | 1         | 0.08545  |
| GDP           | C00035  | NT2       | 3240595.333 | 519604.7114 | 0.16034 | 3795023   | 3161993   | 2764770   | 0.00938 | **  | 3240595.333 | 1654241.333 | 1.9589617 | 0.3141   |
| GDP           | C00035  | I3sg5     | 1654241.333 | 270867.1706 | 0.16374 | 1669527   | 1917142   | 1376055   | 0.00938 | **  | 1654241.333 | 1654241.333 | 1         | 0.16374  |
| GlcNAc-6P     | C00357  | NT2       | 472874.6667 | 75410.93378 | 0.15947 | 548068    | 473308    | 397248    | 0.01118 | *   | 472874.6667 | 264473      | 1.7879884 | 0.28514  |
| GlcNAc-6P     | C00357  | I3sg5     | 264473      | 29507.44359 | 0.11157 | 297615    | 254750    | 241054    | 0.01118 | *   | 264473      | 264473      | 1         | 0.11157  |
| Gln           | C00064  | NT2       | 741289960.7 | 26325017.79 | 0.03551 | 71105114  | 753723183 | 759095585 | 0.02614 | *   | 741289960.7 | 525835826.3 | 1.4097365 | 0.05006  |
| Gln           | C00064  | I3sg5     | 525835826.3 | 105035551.7 | 0.19975 | 509626354 | 638033823 | 429847302 | 0.02614 | *   | 525835826.3 | 525835826.3 | 1         | 0.19975  |
| Gly           | C00037  | NT2       | 14088756.33 | 875840.6699 | 0.06217 | 15037086  | 13918894  | 13310289  | 0.00849 | **  | 14088756.33 | 9263137.667 | 1.5209486 | 0.09455  |
| Gly           | C00037  | I3sg5     | 9263137.667 | 1494718.604 | 0.16136 | 8226445   | 10976530  | 8586438   | 0.00849 | **  | 9263137.667 | 9263137.667 | 1         | 0.16136  |
| GMP           | C00144  | NT2       | 1552161.333 | 29315.47333 | 0.01889 | 1583046   | 1524719   | 1548719   | 0.01161 | *   | 1552161.333 | 852451.6667 | 1.8208203 | 0.03439  |
| GMP           | C00144  | I3sg5     | 852451.6667 | 273329.8772 | 0.32064 | 671871    | 1166912   | 718572    | 0.01161 | *   | 852451.6667 | 852451.6667 | 1         | 0.32064  |
| GSH           | C00051  | NT2       | 99566167.33 | 10036631.49 | 0.1008  | 108177556 | 101977389 | 88543557  | 0.00925 | **  | 99566167.33 | 62824450.33 | 1.5848315 | 0.15976  |
| GSH           | C00051  | I3sg5     | 62824450.33 | 9054845.555 | 0.14413 | 63796470  | 71354072  | 53322809  | 0.00925 | **  | 62824450.33 | 62824450.33 | 1         | 0.14413  |
| GSSG          | C00127  | NT2       | 9952964.667 | 929198.7724 | 0.09336 | 8915971   | 10709985  | 10232938  | 0.00421 | **  | 9952964.667 | 6340444.667 | 1.5697581 | 0.14655  |
| GSSG          | C00127  | I3sg5     | 6340444.667 | 522926.7378 | 0.08247 | 6411607   | 6824146   | 5785581   | 0.00421 | **  | 6340444.667 | 6340444.667 | 1         | 0.08247  |
| GTP           | C00044  | NT2       | 34529720    | 4765738.285 | 0.13802 | 37109900  | 29030237  | 37449833  | 0.0207  | *   | 34529720    | 20568904    | 1.6787341 | 0.2317   |
| GTP           | C00044  | I3sg5     | 20568904    | 4452187.554 | 0.21645 | 23160921  | 23117770  | 15428021  | 0.0207  | *   | 20568904    | 20568904    | 1         | 0.21645  |
| His           | C00135  | NT2       | 37494460.67 | 4703395.137 | 0.12544 | 40099648  | 32064922  | 40318812  | 0.0373  | *   | 37494460.67 | 26739034    | 1.4022369 | 0.1759   |
| His           | C00135  | I3sg5     | 26739034    | 3834942.05  | 0.14342 | 26911274  | 30484954  | 22820874  | 0.0373  | *   | 26739034    | 26739034    | 1         | 0.14342  |
| Lys           | C00047  | NT2       | 3195490.667 | 282205.8335 | 0.08831 | 2909693   | 3202817   | 3473962   | 0.01271 | *   | 3195490.667 | 2243890.333 | 1.424085  | 0.12577  |
| Lys           | C00047  | I3sg5     | 2243890.333 | 260239.9959 | 0.11598 | 2437165   | 2364523   | 1947983   | 0.01271 | *   | 2243890.333 | 2243890.333 | 1         | 0.11598  |
| Mal           | C00149  | NT2       | 66252472.67 | 5661976.686 | 0.08546 | 71564175  | 66897734  | 60295509  | 0.00575 | **  | 66252472.67 | 43583657.67 | 1.5201219 | 0.12991  |
| Mal           | C00149  | I3sg5     | 43583657.67 | 4595969.134 | 0.10545 | 45185891  | 47164044  | 38401038  | 0.00575 | **  | 43583657.67 | 43583657.67 | 1         | 0.10545  |
| NAM           | C00153  | NT2       | 147956365.3 | 16967788.32 | 0.11468 | 155800704 | 159582688 | 128485704 | 0.04767 | *   | 147956365.3 | 112385117.3 | 1.3165121 | 0.15098  |
| NAM           | C00153  | I3sg5     | 112385117.3 | 13721903.75 | 0.1221  | 97705256  | 114561048 | 124889048 | 0.04767 | *   | 112385117.3 | 112385117.3 | 1         | 0.1221   |
| Ornithine     | C00077  | NT2       | 246775      | 11052.75653 | 0.04479 | 259194    | 238018    | 243113    | 0.00792 | **  | 246775      | 180932      | 1.3639102 | 0.06109  |
| Ornithine     | C00077  | I3sg5     | 180932      | 20361.34333 | 0.11254 | 203971    | 173473    | 165352    | 0.00792 | **  | 180932      | 180932      | 1         | 0.11254  |
| Orotidine     | X00006  | NT2       | 4002345.333 | 268779.8036 | 0.06716 | 4311679   | 3869521   | 3825836   | 0.00513 | **  | 4002345.333 | 2496873.667 | 1.6029427 | 0.10765  |
| Orotidine     | X00006  | I3sg5     | 2496873.667 | 384406.1457 | 0.15395 | 2467613   | 2895074   | 2127934   | 0.00513 | **  | 2496873.667 | 2496873.667 | 1         | 0.15395  |
| P-Choline     | C00588  | NT2       | 79721416    | 13161855.23 | 0.1651  | 93982720  | 77140032  | 68041496  | 0.0139  | *   | 79721416    | 44373289.33 | 1.7966082 | 0.29662  |
| P-Choline     | C00588  | I3sg5     | 44373289.33 | 6410635.471 | 0.14447 | 41541244  | 51712224  | 39866400  | 0.0139  | *   | 44373289.33 | 44373289.33 | 1         | 0.14447  |
| Palmitate     | C00249  | NT2       | 34748899.33 | 8587824.169 | 0.24714 | 33886178  | 26624998  | 43735522  | 0.01769 | *   | 34748899.33 | 11021330.67 | 3.1528769 | 0.7792   |
| Palmitate     | C00249  | I3sg5     | 11021330.67 | 6151909.142 | 0.55818 | 10670246  | 17341264  | 5052482   | 0.01769 | *   | 11021330.67 | 11021330.67 | 1         | 0.55818  |
| PPI           | C00013  | NT2       | 261988.3333 | 33859.29033 | 0.12924 | 236943    | 300511    | 248511    | 0.01131 | *   | 261988.3333 | 115839.3333 | 2.2616526 | 0.2923   |
| PPI           | C00013  | I3sg5     | 115839.3333 | 45817.58729 | 0.39553 | 128692    | 153858    | 64968     | 0.01131 | *   | 115839.3333 | 115839.3333 | 1         | 0.39553  |
| Pro           | C00148  | NT2       | 299319356.7 | 58560030.67 | 0.19564 | 358925707 | 297167392 | 241864971 | 0.01936 | *   | 299319356.7 | 164119571.3 | 1.8237883 | 0.35681  |
| Pro           | C00148  | I3sg5     | 164119571.3 | 19996639.91 | 0.12184 | 144965264 | 184863640 | 162529810 | 0.01936 | *   | 164119571.3 | 164119571.3 | 1         | 0.12184  |
| PRPP          | C00119  | NT2       | 652263.3333 | 103628.5494 | 0.15888 | 708821    | 532662    | 715307    | 0.0     |     |             |             |           |          |

| Isotopologue Distribution |         |           |            |      |             |             |             |           |          |        |         |         |         |         |         |     |
|---------------------------|---------|-----------|------------|------|-------------|-------------|-------------|-----------|----------|--------|---------|---------|---------|---------|---------|-----|
| Name                      | KEGG.ID | Condition | Iso        | Nr.C | Exp001      | Exp002      | Exp003      | Norm_Av   | Norm_Std | CV     | MID001  | MID002  | MID003  | Av      | ANOVA   | Sig |
| 2-HG                      | C02830  | NT2       | C12 PARENT | 5    | 2343834.88  | 2154520.372 | 2348404.775 | 85.648782 | 1.7802   | 0.0208 | 83.6085 | 86.452  | 86.8859 | 85.6488 | 0.00651 | **  |
| 2-HG                      | C02630  | I3sg5     | C12 PARENT | 5    | 2131700.76  | 2396061.267 | 1951072.9   | 91.219231 | 0.522    | 0.0057 | 91.2428 | 90.6859 | 91.7291 | 91.2192 | 0.00651 | **  |
| 2-HG                      | C02630  | NT2       | C13-02     | 5    | 246545.8235 | 210178.7515 | 228738.678  | 8.5637122 | 0.2006   | 0.0234 | 8.7947  | 8.4336  | 8.46284 | 8.56371 | 0.00626 | **  |
| 2-HG                      | C02630  | I3sg5     | C13-02     | 5    | 145910.104  | 185790.0729 | 118901.8488 | 6.2890852 | 0.7218   | 0.1148 | 6.24536 | 7.03176 | 5.59013 | 6.28909 | 0.00626 | **  |
| 2-HG                      | C02630  | NT2       | C13-03     | 5    | 30643.05482 | 60620.1114  | 61010.97511 | 1.9275989 | 0.728    | 0.3777 | 1.09309 | 2.43243 | 2.25277 | 1.9276  | 0.03301 | *   |
| 2-HG                      | C02630  | I3sg5     | C13-03     | 5    | 0           | 5675.687175 | 18100.30268 | 0.3552642 | 0.4425   | 1.2456 | 0       | 0.21481 | 0.85098 | 0.35526 | 0.03301 | *   |
| 2-HG                      | C02630  | NT2       | C13-04     | 5    | 98808.67433 | 66840.12783 | 13219.45528 | 2.2319256 | 1.567    | 0.7021 | 3.52467 | 2.68202 | 0.48909 | 2.23193 | 0.92286 |     |
| 2-HG                      | C02630  | I3sg5     | C13-04     | 5    | 58684.48285 | 54628.50871 | 38920.31759 | 2.1364201 | 0.3462   | 0.162  | 2.51186 | 2.06757 | 1.82983 | 2.13642 | 0.92286 |     |
| 2-HG                      | C02630  | NT2       | C13-05     | 5    | 83513.90385 | 0           | 51485.81653 | 1.6279812 | 1.5087   | 0.9267 | 2.97908 | 0       | 1.90486 | 1.62798 | 0.13499 |     |
| 2-HG                      | C02630  | I3sg5     | C13-05     | 5    | 0           | 0           | 0           | 0         | 0        | NA     | 0       | 0       | 0       | 0       | 0.13499 |     |
| 3PG                       | C00197  | NT2       | C12 PARENT | 3    | 52195.45967 | 115314.6225 | 161052.4924 | 6.5299052 | 2.8654   | 0.4388 | 3.4464  | 7.03257 | 9.11074 | 6.52991 | 0.65569 |     |
| 3PG                       | C00197  | I3sg5     | C12 PARENT | 3    | 141904.4427 | 89467.30189 | 93277.41158 | 7.768724  | 3.4197   | 0.4402 | 11.2746 | 4.44218 | 7.58937 | 7.76872 | 0.65569 |     |
| 3PG                       | C00197  | NT2       | C13-03     | 3    | 1462296.792 | 1524406.818 | 1606668.477 | 93.470095 | 2.8654   | 0.0307 | 96.5536 | 92.9674 | 90.8893 | 93.4701 | 0.65569 |     |
| 3PG                       | C00197  | I3sg5     | C13-03     | 3    | 1116713.846 | 1924570.905 | 1135776.669 | 92.231276 | 3.4197   | 0.0371 | 88.7254 | 95.5758 | 92.4106 | 92.2313 | 0.65569 |     |
| 5-Oxoproline              | C01879  | NT2       | C12 PARENT | 5    | 15914934.95 | 14748059.43 | 12696871.18 | 92.456833 | 1.7122   | 0.0185 | 92.8362 | 90.5868 | 93.9475 | 92.4568 | 0.22821 |     |
| 5-Oxoproline              | C01879  | I3sg5     | C12 PARENT | 5    | 10927359.66 | 14375548.32 | 10835106.52 | 93.986719 | 0.737    | 0.0078 | 94.5221 | 93.1461 | 94.292  | 93.9867 | 0.22821 |     |
| 5-Oxoproline              | C01879  | NT2       | C13-01     | 5    | 1963.284442 | 199562.2387 | 75758.99429 | 0.5992604 | 0.6081   | 0.1047 | 0.01145 | 1.22577 | 0.56056 | 0.59926 | 0.5125  |     |
| 5-Oxoproline              | C01879  | I3sg5     | C13-01     | 5    | 0           | 128636.817  | 0           | 0.2778333 | 0.4812   | 1.7321 | 0       | 0.8335  | 0       | 0.27783 | 0.5125  |     |
| 5-Oxoproline              | C01879  | NT2       | C13-02     | 5    | 778180.9319 | 841223.1433 | 588887.8272 | 4.6879044 | 0.4248   | 0.0906 | 4.53935 | 5.16703 | 4.35734 | 4.6879  | 0.05309 |     |
| 5-Oxoproline              | C01879  | I3sg5     | C13-02     | 5    | 405928.6941 | 189368.8492 | 481857.965  | 3.831068  | 0.343    | 0.0895 | 3.5113  | 3.78856 | 4.19335 | 3.83107 | 0.05309 |     |
| 5-Oxoproline              | C01879  | NT2       | C13-04     | 5    | 354829.9308 | 344918.6355 | 112244.3178 | 1.6729784 | 0.73     | 0.4363 | 2.06982 | 2.11859 | 0.83053 | 1.67298 | 0.5511  |     |
| 5-Oxoproline              | C01879  | I3sg5     | C13-04     | 5    | 134356.2896 | 256446.5932 | 152207.0489 | 1.3828008 | 0.2548   | 0.1842 | 1.16219 | 1.66164 | 1.32457 | 1.3828  | 0.5511  |     |
| 5-Oxoproline              | C01879  | NT2       | C13-05     | 5    | 93113.09291 | 146822.5298 | 41097.37218 | 0.5830235 | 0.3009   | 0.516  | 0.54315 | 0.90183 | 0.30409 | 0.58302 | 0.81755 |     |
| 5-Oxoproline              | C01879  | I3sg5     | C13-05     | 5    | 93000.49731 | 87999.33176 | 21843.14466 | 0.5215789 | 0.3101   | 0.5945 | 0.80446 | 0.57019 | 0.19009 | 0.52158 | 0.81755 |     |
| A                         | C00212  | NT2       | C12 PARENT | 10   | 232912.7924 | 189368.8492 | 201244.6027 | 29.642607 | 3.8527   | 0.13   | 29.6257 | 25.9794 | 33.5037 | 29.6426 | 0.35127 |     |
| A                         | C00212  | I3sg5     | C12 PARENT | 10   | 114440.5201 | 184611.2438 | 168734.2359 | 33.53696  | 5.1087   | 0.1523 | 39.4088 | 30.1114 | 31.0907 | 33.537  | 0.35127 |     |
| A                         | C00212  | NT2       | C13-04     | 10   | 16096.05285 | 23773.19731 | 0           | 1.7620246 | 1.6381   | 0.9297 | 2.04737 | 3.23871 | 0       | 1.76202 | 0.39618 |     |
| A                         | C00212  | I3sg5     | C13-04     | 10   | 0           | 3415.306344 | 9155.589706 | 0.7480179 | 0.8596   | 1.1491 | 0       | 0.55706 | 1.68699 | 0.74802 | 0.39618 |     |
| A                         | C00212  | NT2       | C13-05     | 10   | 485925.7493 | 480830.2896 | 374533.6731 | 63.222219 | 1.9959   | 0.0316 | 61.8082 | 65.5052 | 62.3532 | 63.2222 | 0.79598 |     |
| A                         | C00212  | I3sg5     | C13-05     | 10   | 175952.7941 | 405067.5534 | 350974.2282 | 63.77683  | 2.8462   | 0.0446 | 60.5912 | 66.0694 | 64.6699 | 63.7768 | 0.79598 |     |
| A                         | C00212  | NT2       | C13-06     | 10   | 51249.07693 | 40060.96922 | 24886.01998 | 5.3731495 | 1.1901   | 0.2215 | 6.51872 | 5.45765 | 4.14308 | 5.37315 | 0.04642 | *   |
| A                         | C00212  | I3sg5     | C13-06     | 10   | 0           | 20000.02236 | 13852.46547 | 1.9381922 | 1.7156   | 0.8852 | 0       | 3.26215 | 2.85243 | 1.93819 | 0.04642 | *   |
| Ac-carnitine              | C02571  | NT2       | C12 PARENT | 9    | 9198687.045 | 8603879.979 | 5904976.485 | 65.348949 | 1.3952   | 0.0214 | 65.8984 | 66.3858 | 63.7626 | 65.3489 | 0.02917 | *   |
| Ac-carnitine              | C02571  | I3sg5     | C12 PARENT | 9    | 3959574.588 | 7078004.506 | 4438011.666 | 60.64518  | 2.012    | 0.0332 | 59.8135 | 59.1824 | 62.9397 | 60.6452 | 0.02917 | *   |
| Ac-carnitine              | C02571  | NT2       | C13-01     | 9    | 0           | 0           | 0           | 0         | 0        | NA     | 0       | 0       | 0       | 0       | NA      |     |
| Ac-carnitine              | C02571  | I3sg5     | C13-01     | 9    | 0           | 0           | 0           | 0         | 0        | NA     | 0       | 0       | 0       | 0       | NA      |     |
| Ac-carnitine              | C02571  | NT2       | C13-02     | 9    | 4760201.828 | 4356545.756 | 3355894.728 | 34.651051 | 1.3952   | 0.0403 | 34.1016 | 33.6142 | 36.2374 | 34.6511 | 0.02917 | *   |
| Ac-carnitine              | C02571  | I3sg5     | C13-02     | 9    | 2660297.215 | 4881635.853 | 2613204.976 | 39.35482  | 2.012    | 0.0511 | 40.1865 | 40.8176 | 37.0603 | 39.3548 | 0.02917 | *   |
| Ac-carnitine              | C02571  | NT2       | C13-03     | 9    | 0           | 0           | 0           | 0         | 0        | NA     | 0       | 0       | 0       | 0       | NA      |     |
| Ac-carnitine              | C02571  | I3sg5     | C13-03     | 9    | 0           | 0           | 0           | 0         | 0        | NA     | 0       | 0       | 0       | 0       | NA      |     |
| Acetyl-CoA                | C00024  | NT2       | C12 PARENT | 23   | 6946.123343 | 7112.645581 | 17920.71294 | 11.925446 | 1.5227   | 0.1277 | 10.7879 | 11.3331 | 13.6553 | 11.9254 | 0.20886 |     |
| Acetyl-CoA                | C00024  | I3sg5     | C12 PARENT | 23   | 16697.64761 | 5849.868831 | 8432.881503 | 13.577532 | 1.1565   | 0.0852 | 14.7498 | 12.4375 | 13.5453 | 13.5775 | 0.20886 |     |
| Acetyl-CoA                | C00024  | NT2       | C13-01     | 23   | 0           | 54.76352522 | 439.4611594 | 0.1407073 | 0.1737   | 1.2346 | 0       | 0.08726 | 0.33486 | 0.14071 | 0.23328 |     |
| Acetyl-CoA                | C00024  | I3sg5     | C13-01     | 23   | 0           | 0           | 0           | 0         | 0        | NA     | 0       | 0       | 0       | 0       | 0.23328 |     |
| Acetyl-CoA                | C00024  | NT2       | C13-02     | 23   | 8629.146431 | 9883.661704 | 17800.59272 | 14.23798  | 1.3105   | 0.092  | 13.4018 | 15.7483 | 13.5638 | 14.238  | 0.97327 |     |
| Acetyl-CoA                | C00024  | I3sg5     | C13-02     | 23   | 15753.16567 | 7662.370296 | 7695.463933 | 14.189128 | 1.9793   | 0.1395 | 13.9155 | 16.291  | 12.3608 | 14.1891 | 0.97327 |     |
| Acetyl-CoA                | C00024  | NT2       | C13-03     | 23   | 0           | 0           | 263.7339446 | 0.0669872 | 0.116    | 1.7321 | 0       | 0.20096 | 0.06699 | 0.18617 |         |     |
| Acetyl-CoA                | C00024  | I3sg5     | C13-03     | 23   | 1316.114503 | 0           | 425.1421716 | 0.615157  | 0.5842   | 0.9497 | 1.16259 | 0.68288 | 0.61516 | 0.18617 |         |     |
| Acetyl-CoA                | C00024  | NT2       | C13-04     | 23   | 0           | 958.1863354 | 2063.7996   | 1.0331102 | 0.895    | 0.8663 | 0       | 1.52674 | 1.57259 | 1.03311 | 0.48127 |     |
| Acetyl-CoA                | C00024  | I3sg5     | C13-04     | 23   | 134.721198  | 509.1916119 | 330.672493  | 0.575841  | 0.4835   | 0.8371 | 0.11901 | 1.0826  | 0.53115 | 0.57588 | 0.48127 |     |
| Acetyl-CoA                | C00024  | NT2       | C13-05     | 23   | 19253.05449 | 17703.0764  | 44446.76354 | 30.659007 | 2.9052   | 0.0948 | 29.9017 | 28.2075 | 33.8678 | 30.659  | 0.40345 |     |
| Acetyl-CoA                | C00024  | I3sg5     | C13-05     | 23   | 36464.90214 | 15392.00134 | 19795.99474 | 32.244518 | 0.4648   | 0.0144 | 32.2112 | 32.7251 | 31.7973 | 32.2445 | 0.40345 |     |
| Acetyl-CoA                | C00024  | NT2       | C13-06     | 23   | 3340.616294 | 3353.675707 | 6023.554301 | 5.0405918 | 0.398    | 0.079  | 5.18827 | 5.34364 | 4.58987 | 5.04059 | 0.16452 |     |
| Acetyl-CoA                | C00024  | I3sg5     | C13-06     | 23   | 3008.036417 | 2423.912361 | 1076.922156 | 3.7155657 | 1.2907   | 0.3474 | 2.65714 | 5.1535  | 3.36606 | 3.71557 | 0.16452 |     |
| Acetyl-CoA                | C00024  | NT2       | C13-07     | 23   | 24410.22699 | 23305.03177 | 41630.65451 | 35.588901 | 3.3713   | 0.0947 | 37.9112 | 37.1335 | 31.722  | 35.5889 | 0.55862 |     |
| Acetyl-CoA                | C00024  | I3sg5     | C13-07     | 23   | 39093.528   | 14957.51397 | 22427.39442 | 34.119488 | 2.1415   | 0.0628 | 34.5332 | 31.8013 | 36.024  | 34.1195 | 0.55862 |     |
| Acetyl-CoA                | C00024  | NT2       | C13-08     | 23   | 1808.700174 | 373.2560965 | 0           | 1.1346014 | 1.4803   | 1.3047 | 2.80907 | 0.59473 | 0       | 1.1346  | 0.86198 |     |
| Acetyl-CoA                | C00024  | I3sg5     | C13-08     | 23   | 737.6249013 | 239.443179  | 1072.323154 | 0.9610288 | 0.6632   | 0.6901 | 0.65158 | 0.50908 | 1.72242 | 0.96103 | 0.86198 |     |
| Acetyl-CoA                | C00024  | NT2       | C13-09     | 23   | 0           | 15.84204293 | 646.6801574 | 0.1726679 | 0.2775   | 1.6071 | 0       | 0.02524 | 0.49276 | 0.17267 | 0.34181 |     |
| Acetyl-CoA                | C00024  | I3sg5     | C13-09     | 23   | 0           | 0           | 0           | 0         | 0        | NA     | 0       | 0       | 0       | 0       | 0.34181 |     |
| Aconitate                 | C00417  | NT2       | C12 PARENT | 6    | 179971.3443 | 113908.5318 | 231782.0085 | 40.806264 | 9.065    | 0.222  |         |         |         |         |         |     |

|               |        |       |            |    |             |             |             |             |           |        |         |         |         |           |             |         |
|---------------|--------|-------|------------|----|-------------|-------------|-------------|-------------|-----------|--------|---------|---------|---------|-----------|-------------|---------|
| Ala           | C00041 | I3sg5 | C13-02     | 3  | 0           | 134106.3193 | 126819.7039 | 0.64817     | 0.565     | 0.8717 | 0       | 0.90811 | 1.0364  | 0.64817   | 0.13668     |         |
| Ala           | C00041 | NT2   | C13-03     | 3  | 20696604.4  | 20065972.48 | 15237215.85 | 90.081158   | 0.473     | 0.0053 | 89.5383 | 90.4025 | 90.3038 | 90.0815   | 0.5735      |         |
| Ala           | C00041 | I3sg5 | C13-03     | 3  | 9279333.415 | 13364082.19 | 10986848.36 | 90.375921   | 0.6856    | 0.0076 | 90.9936 | 90.4958 | 89.6383 | 90.3759   | 0.5735      |         |
| AMP           | C00020 | NT2   | C12 PARENT | 10 | 4736954.325 | 4865386.693 | 4310876.32  | 20.389953   | 0.6757    | 0.0331 | 19.6958 | 20.4284 | 21.0456 | 20.39     | 0.01751 *   |         |
| AMP           | C00020 | I3sg5 | C12 PARENT | 10 | 2539661.105 | 4218472.381 | 2610611.297 | 22.65773    | 0.7462    | 0.0329 | 22.5812 | 21.9527 | 23.4392 | 22.6577   | 0.01751 *   |         |
| AMP           | C00020 | NT2   | C13-01     | 10 | 0           | 0           | 0           | 0           | 0         | 0 NA   | 0       | 0       | 0       | 0         | 0 NA        |         |
| AMP           | C00020 | I3sg5 | C13-01     | 10 | 0           | 0           | 0           | 0           | 0         | 0 NA   | 0       | 0       | 0       | 0         | 0 NA        |         |
| AMP           | C00020 | NT2   | C13-02     | 10 | 159981.6853 | 197750.5256 | 154038.064  | 0.7491668   | 0.0826    | 0.1102 | 0.66519 | 0.8303  | 0.75201 | 0.74917   | 0.0756      |         |
| AMP           | C00020 | I3sg5 | C13-02     | 10 | 108765.5164 | 157866.3024 | 117802.5273 | 0.9487646   | 0.1191    | 0.1256 | 0.96708 | 0.82153 | 1.05768 | 0.94876   | 0.0756      |         |
| AMP           | C00020 | NT2   | C13-03     | 10 | 237781.0896 | 208624.2609 | 148033.0259 | 0.8622441   | 0.1335    | 0.1548 | 0.98867 | 0.87596 | 0.72269 | 0.86224   | 0.16402     |         |
| AMP           | C00020 | I3sg5 | C13-03     | 10 | 126108.2727 | 196454.6098 | 103448.2176 | 1.0241427   | 0.0963    | 0.094  | 1.12128 | 1.02234 | 0.9288  | 1.02414   | 0.16402     |         |
| AMP           | C00020 | NT2   | C13-04     | 10 | 382545.0338 | 389515.6395 | 258990.8723 | 1.4968152   | 0.2025    | 0.1353 | 1.59059 | 1.63547 | 1.26439 | 1.49682   | 0.87958     |         |
| AMP           | C00020 | I3sg5 | C13-04     | 10 | 146606.1529 | 243277.5503 | 229224.6774 | 1.5425418   | 0.4469    | 0.2897 | 1.30354 | 1.266   | 2.05808 | 1.54254   | 0.87958     |         |
| AMP           | C00020 | NT2   | C13-05     | 10 | 16688830.12 | 16534954.68 | 14427319.26 | 69.750087   | 0.5923    | 0.0085 | 69.3907 | 69.4258 | 70.4338 | 69.7501   | 0.50786     |         |
| AMP           | C00020 | I3sg5 | C13-05     | 10 | 7833813.799 | 13497708.12 | 7482197.293 | 69.02459    | 1.6255    | 0.0235 | 69.6538 | 70.2414 | 67.1785 | 69.0246   | 0.50786     |         |
| AMP           | C00020 | NT2   | C13-06     | 10 | 1375672.561 | 1216329.605 | 948727.6669 | 5.1528756   | 0.5456    | 0.1059 | 5.71993 | 5.10704 | 4.63166 | 5.15288   | 0.01873 *   |         |
| AMP           | C00020 | I3sg5 | C13-06     | 10 | 382495.1196 | 705185.9068 | 456138.8922 | 3.220282    | 0.3502    | 0.0941 | 3.40093 | 3.66975 | 4.0954  | 3.72203   | 0.01873 *   |         |
| AMP           | C00020 | NT2   | C13-07     | 10 | 426752.1533 | 337607.563  | 235545.2759 | 1.4472821   | 0.3133    | 0.2165 | 1.7744  | 1.41752 | 1.14993 | 1.44728   | 0.13858     |         |
| AMP           | C00020 | I3sg5 | C13-07     | 10 | 109329.7629 | 197209.362  | 138358.1007 | 1.0802024   | 0.1429    | 0.1323 | 0.9721  | 1.02627 | 1.24224 | 1.0802    | 0.13858     |         |
| AMP           | C00020 | NT2   | C13-08     | 10 | 42009.57479 | 66559.1073  | 0           | 0.1513786   | 0.1412    | 0.9326 | 0.17467 | 0.27946 | 0       | 0.15138   | 0.13685     |         |
| AMP           | C00020 | I3sg5 | C13-08     | 10 | 0           | 0           | 0           | 0           | 0         | 0 NA   | 0       | 0       | 0       | 0         | 0.13685     |         |
| Arg-Succ      | C03406 | NT2   | C12 PARENT | 10 | 144235.188  | 93192.2119  | 102910.6968 | 86.074386   | 7.2799    | 0.0846 | 93.2036 | 78.6527 | 86.3668 | 86.0744   | 0.17904     |         |
| Arg-Succ      | C03406 | I3sg5 | C12 PARENT | 10 | 81337.45273 | 119740.3274 | 14705.31558 | 94.614803   | 5.4455    | 0.0576 | 89.1109 | 94.7335 | 100     | 94.6148   | 0.17904     |         |
| Arg-Succ      | C03406 | NT2   | C13-02     | 10 | 0           | 0           | 0           | 0           | 8.103     | 1.055  | 0       | 16.1485 | 6.89394 | 7.68081   | 0.70466     |         |
| Arg-Succ      | C03406 | I3sg5 | C13-02     | 10 | 9939.190955 | 6656.706727 | 0           | 5.3851967   | 5.4455    | 1.0112 | 10.8891 | 5.26651 | 0       | 5.3852    | 0.70466     |         |
| Arg-Succ      | C03406 | NT2   | C13-03     | 10 | 10517.57777 | 6159.846269 | 8030.134947 | 6.2447998   | 0.9063    | 0.1451 | 6.79637 | 5.19881 | 6.73922 | 6.2448    | 0.00028 *** |         |
| Arg-Succ      | C03406 | I3sg5 | C13-03     | 10 | 0           | 0           | 0           | 0           | 0         | 0 NA   | 0       | 0       | 0       | 0         | 0.00028 *** |         |
| Asn           | C00152 | NT2   | C12 PARENT | 4  | 2193066.117 | 2117512.489 | 1927887.164 | 77.95279    | 8.2876    | 0.1063 | 72.2819 | 74.1126 | 87.4639 | 77.9528   | 0.94238     |         |
| Asn           | C00152 | I3sg5 | C12 PARENT | 4  | 1527369.537 | 1877092.971 | 1252089.27  | 78.503293   | 9.2168    | 0.1174 | 88.73   | 75.9414 | 70.8385 | 78.5033   | 0.94238     |         |
| Asn           | C00152 | NT2   | C13-01     | 4  | 128932.2728 | 4274.923981 | 0           | 1.4663783   | 2.4114    | 1.6445 | 4.24951 | 0.14962 | 0       | 1.46638   | 0.95745     |         |
| Asn           | C00152 | I3sg5 | C13-01     | 4  | 12586.29683 | 34546.533   | 44605.09641 | 1.5580845   | 0.906     | 0.5842 | 0.73118 | 1.39765 | 2.52359 | 1.55808   | 0.95745     |         |
| Asn           | C00152 | NT2   | C13-02     | 4  | 318033.7701 | 330590.6791 | 175296.5058 | 10.001864   | 1.8561    | 0.1856 | 10.4822 | 11.5706 | 7.95281 | 10.0019   | 0.76295     |         |
| Asn           | C00152 | I3sg5 | C13-02     | 4  | 0           | 0           | 272252.7958 | 258221.5636 | 8.5412345 | 7.6122 | 0.8912  | 0       | 11.0145 | 14.6092   | 8.54123     | 0.76295 |
| Asn           | C00152 | NT2   | C13-03     | 4  | 371794.9796 | 363126.0835 | 101025.4844 | 9.8489158   | 4.5658    | 0.4636 | 12.2541 | 12.7094 | 4.5833  | 9.84892   | 0.65469     |         |
| Asn           | C00152 | I3sg5 | C13-03     | 4  | 181411.1566 | 287873.4757 | 198056.093  | 11.130173   | 0.5576    | 0.0501 | 10.5388 | 11.6465 | 11.2053 | 11.1302   | 0.65469     |         |
| Asn           | C00152 | NT2   | C13-04     | 4  | 22220.83765 | 41650.87783 | 0           | 0.7300523   | 0.7289    | 0.9984 | 0.73238 | 1.45777 | 0       | 0.73005   | 0.41585     |         |
| Asn           | C00152 | I3sg5 | C13-04     | 4  | 0           | 0           | 14555.35689 | 0.2744956   | 0.4754    | 1.7321 | 0       | 0       | 0.82349 | 0.2745    | 0.41585     |         |
| Asp           | C00049 | NT2   | C12 PARENT | 4  | 33247027.67 | 32009841.61 | 27000262.92 | 63.962103   | 0.8359    | 0.0131 | 63.0765 | 64.0724 | 64.7373 | 63.9621   | 0.80636     |         |
| Asp           | C00049 | I3sg5 | C12 PARENT | 4  | 15042944.19 | 20009742.13 | 17467867.3  | 63.776595   | 0.8983    | 0.0141 | 62.8129 | 63.9263 | 64.5906 | 63.7766   | 0.80636     |         |
| Asp           | C00049 | NT2   | C13-01     | 4  | 1714620.872 | 1348818.57  | 977062.1631 | 2.7651705   | 0.4587    | 0.1659 | 3.25299 | 2.69986 | 2.34266 | 2.76517   | 0.46247     |         |
| Asp           | C00049 | I3sg5 | C13-01     | 4  | 491500.1796 | 938902.8705 | 621579.4786 | 2.4500882   | 0.4915    | 0.2006 | 2.05229 | 2.99957 | 2.29824 | 2.45009   | 0.46247     |         |
| Asp           | C00049 | NT2   | C13-02     | 4  | 8367980.843 | 7724329.893 | 6547056.214 | 15.67826    | 0.2079    | 0.0133 | 15.8758 | 15.4614 | 15.6976 | 15.6783   | 0.62503     |         |
| Asp           | C00049 | I3sg5 | C13-02     | 4  | 3820629.501 | 4771345.098 | 4179329     | 15.550144   | 0.3647    | 0.0235 | 15.9533 | 15.2433 | 15.4538 | 15.5501   | 0.62503     |         |
| Asp           | C00049 | NT2   | C13-03     | 4  | 6599225.527 | 6368406.671 | 5443877.181 | 12.773319   | 0.2672    | 0.0209 | 12.5201 | 12.7473 | 13.0525 | 12.7733   | 0.31607     |         |
| Asp           | C00049 | I3sg5 | C13-03     | 4  | 3327092.07  | 4033694.619 | 3471339.557 | 13.205032   | 0.5959    | 0.0451 | 13.8925 | 12.8867 | 12.8359 | 13.2051   | 0.31607     |         |
| Asp           | C00049 | NT2   | C13-04     | 4  | 2780173.652 | 2507436.975 | 1739144.137 | 4.8211479   | 0.5783    | 0.12   | 5.27457 | 5.01901 | 4.16987 | 4.82115   | 0.61528     |         |
| Asp           | C00049 | I3sg5 | C13-04     | 4  | 1266648.859 | 1547582.982 | 1303867.121 | 5.0181405   | 0.2425    | 0.0483 | 5.28898 | 4.94415 | 4.82128 | 5.01814   | 0.61528     |         |
| ATP           | C00002 | NT2   | C12 PARENT | 10 | 12560540.38 | 10768324.18 | 11946829.47 | 19.285598   | 0.6955    | 0.0361 | 18.5626 | 19.3442 | 19.95   | 19.2856   | 0.11004     |         |
| ATP           | C00002 | I3sg5 | C12 PARENT | 10 | 7315920.476 | 7967076.399 | 5176762.463 | 20.676605   | 0.9493    | 0.0459 | 20.5191 | 21.6948 | 19.8159 | 20.6766   | 0.11004     |         |
| ATP           | C00002 | NT2   | C13-01     | 10 | 0           | 0           | 0           | 0           | 0         | 0 NA   | 0       | 0       | 0       | 0         | 0 NA        |         |
| ATP           | C00002 | I3sg5 | C13-01     | 10 | 0           | 0           | 0           | 0           | 0         | 0 NA   | 0       | 0       | 0       | 0         | 0 NA        |         |
| ATP           | C00002 | NT2   | C13-02     | 10 | 592262.3517 | 377943.5297 | 645852.5026 | 0.8775703   | 0.1998    | 0.2277 | 0.87527 | 0.67894 | 1.0785  | 0.87757   | 0.2096      |         |
| ATP           | C00002 | I3sg5 | C13-02     | 10 | 270279.0901 | 260006.9336 | 161534.6732 | 0.6948008   | 0.0708    | 0.1019 | 0.75806 | 0.70801 | 0.61833 | 0.6948    | 0.2096      |         |
| ATP           | C00002 | NT2   | C13-03     | 10 | 618964.7947 | 513707.9112 | 616068.3096 | 0.9554414   | 0.0636    | 0.0666 | 0.91474 | 0.92283 | 1.02876 | 0.95544   | 0.17209     |         |
| ATP           | C00002 | I3sg5 | C13-03     | 10 | 491007.1108 | 375356.9854 | 276442.664  | 1.1524793   | 0.1954    | 0.1695 | 1.37713 | 1.02212 | 1.05818 | 1.15248   | 0.17209     |         |
| ATP           | C00002 | NT2   | C13-04     | 10 | 1163767.906 | 852082.4252 | 742612.8141 | 1.4968774   | 0.2417    | 0.1615 | 1.71987 | 1.53068 | 1.24008 | 1.49688   | 0.87127     |         |
| ATP           | C00002 | I3sg5 | C13-04     | 10 | 439698.1359 | 581114.8243 | 466445.0651 | 1.5337081   | 0.2793    | 0.1821 | 2.33233 | 1.58241 | 1.78549 | 1.53371   | 0.87127     |         |
| ATP           | C00002 | NT2   | C13-05     | 10 | 46903559.45 | 38882429.38 | 41720365.5  | 69.610991   | 0.2706    | 0.0039 | 69.3164 | 69.8484 | 69.6681 | 69.611    | 0.71154     |         |
| ATP           | C00002 | I3sg5 | C13-05     | 10 | 25250002.82 | 2519935.06  | 18066168.17 | 69.82204    | 0.8798    | 0.0126 | 70.819  | 69.4924 | 69.1547 | 69.822    | 0.71154     |         |
| ATP           | C00002 | NT2   | C13-06     | 10 | 4548159.611 | 3326235.355 | 3304659.03  | 6.0717142   | 0.6073    | 0.1    | 6.7215  | 5.97525 | 5.51839 | 6.07171   | 0.10425     |         |
| ATP           | C00002 | I3sg5 | C13-06     | 10 | 1423429.7   | 1393506.095 | 1520056.771 | 4.5351591   | 1.1158    | 0.246  | 3.99231 | 3.7946  | 5.81856 | 4.53516   | 0.10425     |         |
| ATP           | C00002 | NT2   | C13-07     | 10 | 1192634.479 | 763333.9525 | 819942.2845 | 1.5009987   | 0.2265    | 0.1509 | 1.76253 | 1.37125 | 1.36921 | 1.501     | 0.99356     |         |
| ATP           | C00002 | I3sg5 | C13-07     | 10 | 454347.2918 | 572885.9658 | 434751.2378 | 1.4994946   | 0.2018    | 0.1346 | 1.27431 | 1.56    | 1.66417 | 1.49949   | 0.99356     |         |
| ATP           | C00002 | NT2   | C13-08     | 10 | 85995.64044 | 182792.2825 | 88012.28905 | 0.200809    | 0.1109    | 0.5523 | 0.12709 | 0.32837 | 0.14697 | 0.20081   | 0.18829     |         |
| ATP           | C00002 | I3sg5 | C13-08     | 10 | 9568.853656 | 53489.41287 | 22113.245   | 0.0857131   | 0.0594    | 0.6932 | 0.02684 | 0.14565 | 0.08465 | 0.08571   | 0.18829     |         |
| Carbamoyl-Asp | C00438 | NT2   | C12 PARENT | 5  | 6529014.76  | 5545414.936 | 7035159.17  | 72.692384   | 0.9553    | 0.0131 | 73.2872 | 73.1995 | 71.5904 | 72.6924   | 0.11346     |         |
| Carbamoyl-Asp | C00438 | I3sg5 | C12 PARENT | 5  | 8361222.126 | 8127675.226 | 5694983.676 | 71.317581   | 0.6903    | 0.0097 | 70.5342 | 71.5817 | 71.8368 | 71.3176   | 0.11346     |         |
| Carbamoyl-Asp | C00438 | NT2   | C13-01     | 5  | 15206.37913 | 0           | 0           | 0.0568965   | 0.0985    | 1.7321 | 0.17069 | 0       | 0       | 0.0569    | 0.69167     |         |
| Carbamoyl-Asp | C00438 | I3sg5 | C13-01     | 5  | 3509.038569 | 0           | 21711.33828 | 0.1011566   | 0.1503    | 1.4858 | 0.0296  | 0       | 0.27387 | 0.10116</ |             |         |

|               |        |       |            |    |             |             |              |           |         |        |         |         |         |         |            |
|---------------|--------|-------|------------|----|-------------|-------------|--------------|-----------|---------|--------|---------|---------|---------|---------|------------|
| CDP-EIA       | C00570 | NT2   | C13-06     | 11 | 45205.28205 | 30806.57452 | 18677.56516  | 3.0972931 | 1.354   | 0.4372 | 4.49535 | 3.00438 | 1.79215 | 3.09729 | 0.15951    |
| CDP-EIA       | C00570 | I3sg5 | C13-06     | 11 | 12655.85062 | 31135.45273 | 3121.054663  | 1.4229751 | 0.9956  | 0.6996 | 1.32548 | 2.46371 | 0.47973 | 1.42298 | 0.15951    |
| CDP-EIA       | C00570 | NT2   | C13-07     | 11 | 41390.86054 | 79322.63367 | 112007.581   | 7.533073  | 3.3203  | 0.4408 | 4.11601 | 7.73586 | 10.7473 | 7.53307 | 0.72376    |
| CDP-EIA       | C00570 | I3sg5 | C13-07     | 11 | 76595.58503 | 72812.18572 | 42332.31827  | 6.7634912 | 1.1519  | 0.1703 | 8.02207 | 5.76153 | 6.50687 | 6.76349 | 0.72376    |
| CDP-EIA       | C00570 | NT2   | C13-08     | 11 | 30018.07706 | 18396.15119 | 43288.75059  | 2.9775986 | 1.1798  | 0.3962 | 2.98509 | 1.79407 | 4.15364 | 2.9776  | 0.24467    |
| CDP-EIA       | C00570 | I3sg5 | C13-08     | 11 | 23411.9628  | 26173.02127 | 8453.63088   | 1.9408131 | 0.5872  | 0.3026 | 2.452   | 2.07104 | 1.2994  | 1.94081 | 0.24467    |
| Cit           | C00158 | NT2   | C12 PARENT | 6  | 40435219.2  | 32855413.39 | 35352424.84  | 32.304049 | 1.0362  | 0.0321 | 32.1825 | 31.334  | 33.3957 | 32.304  | 0.03479 *  |
| Cit           | C00158 | I3sg5 | C12 PARENT | 6  | 27197054.13 | 30701755.79 | 23379102.11  | 34.804696 | 0.9092  | 0.0261 | 35.2336 | 35.4202 | 33.7603 | 34.8047 | 0.03479 *  |
| Cit           | C00158 | NT2   | C13-01     | 6  | 1760910.248 | 1744938.334 | 1857030.902  | 1.6066311 | 0.1833  | 0.1141 | 1.40151 | 1.66414 | 1.75425 | 1.60663 | 0.8325     |
| Cit           | C00158 | I3sg5 | C13-01     | 6  | 1214118.97  | 1409166.877 | 1071974.618  | 1.5821969 | 0.0397  | 0.0251 | 1.57288 | 1.62574 | 1.54797 | 1.5822  | 0.8325     |
| Cit           | C00158 | NT2   | C13-02     | 6  | 44076753.79 | 37571323.52 | 36830109.91  | 35.234627 | 0.5368  | 0.0152 | 35.0808 | 35.8315 | 34.7916 | 35.2346 | 0.07053    |
| Cit           | C00158 | I3sg5 | C13-02     | 6  | 25632146.3  | 29253855.74 | 24057508.39  | 33.898662 | 0.7776  | 0.0229 | 33.2062 | 33.7498 | 34.74   | 33.8987 | 0.07053    |
| Cit           | C00158 | NT2   | C13-03     | 6  | 7647603.701 | 6658655.482 | 6431144.19   | 6.1707474 | 0.1556  | 0.0252 | 6.08674 | 6.35031 | 6.07518 | 6.17075 | 0.3132     |
| Cit           | C00158 | I3sg5 | C13-03     | 6  | 4957340.619 | 5413857.288 | 4309693.535  | 6.2971506 | 0.1089  | 0.0173 | 6.42219 | 6.24589 | 6.22337 | 6.29715 | 0.3132     |
| Cit           | C00158 | NT2   | C13-04     | 6  | 15891207.41 | 13232599.41 | 12767945.02  | 12.442977 | 0.3309  | 0.0266 | 12.6478 | 12.6198 | 12.0612 | 12.443  | 0.0334 *   |
| Cit           | C00158 | I3sg5 | C13-04     | 6  | 9092936.133 | 9870962.572 | 8214732.659  | 11.676737 | 0.2534  | 0.0217 | 11.7798 | 11.388  | 11.8624 | 11.6767 | 0.0334 *   |
| Cit           | C00158 | NT2   | C13-05     | 6  | 11529232.97 | 9504529.134 | 9425684.469  | 9.0481745 | 0.1368  | 0.0151 | 9.17614 | 9.0644  | 8.90398 | 9.04817 | 0.49238    |
| Cit           | C00158 | I3sg5 | C13-05     | 6  | 7051019.874 | 7836766.607 | 6348175.286  | 9.1142401 | 0.0653  | 0.0072 | 9.13454 | 9.04117 | 9.16701 | 9.11424 | 0.49238    |
| Cit           | C00158 | NT2   | C13-06     | 6  | 4302678.722 | 3288066.433 | 3194900.041  | 3.1927939 | 0.2091  | 0.0655 | 3.42451 | 3.13581 | 3.01806 | 3.19279 | 0.01237 *  |
| Cit           | C00158 | I3sg5 | C13-06     | 6  | 2046161.717 | 2192306.781 | 1869017.603  | 2.626318  | 0.0875  | 0.0333 | 2.65079 | 2.52923 | 2.69893 | 2.62632 | 0.01237 *  |
| CMP           | C00055 | NT2   | C12 PARENT | 9  | 137666.5794 | 141783.7434 | 228789.1758  | 60.277907 | 17.1123 | 0.2839 | 65.9401 | 41.0522 | 73.8414 | 60.2779 | 0.74184    |
| CMP           | C00055 | I3sg5 | C12 PARENT | 9  | 191014.6187 | 138034.3999 | 48527.82669  | 53.971137 | 25.7733 | 0.4775 | 77.7718 | 57.5437 | 26.5979 | 53.9711 | 0.74184    |
| CMP           | C00055 | NT2   | C13-05     | 9  | 71108.56315 | 203590.8459 | 81049.29429  | 39.722093 | 17.1123 | 0.4308 | 34.0599 | 58.9478 | 26.1586 | 39.7221 | 0.74184    |
| CMP           | C00055 | I3sg5 | C13-05     | 9  | 54594.49    | 101842.9515 | 133922.2032  | 46.028863 | 25.7733 | 0.5599 | 22.2282 | 42.4563 | 73.4021 | 46.0289 | 0.74184    |
| CoA           | C00010 | NT2   | C12 PARENT | 21 | 103303.0562 | 97997.87305 | 83816.9873   | 31.723587 | 0.3952  | 0.0125 | 31.6396 | 31.3771 | 32.1541 | 31.7236 | 0.00318 ** |
| CoA           | C00010 | I3sg5 | C12 PARENT | 21 | 60147.09046 | 77772.6126  | 52827.74306  | 35.392861 | 0.9221  | 0.0261 | 36.4576 | 34.85   | 34.871  | 35.3929 | 0.00318 ** |
| CoA           | C00010 | NT2   | C13-01     | 21 | 0           | 0           | 0            | 0         | 0       | NA     | 0       | 0       | 0       | 0       | NA         |
| CoA           | C00010 | I3sg5 | C13-01     | 21 | 0           | 0           | 0            | 0         | 0       | NA     | 0       | 0       | 0       | 0       | NA         |
| CoA           | C00010 | NT2   | C13-02     | 21 | 0           | 0           | 0            | 0         | 0       | NA     | 0       | 0       | 0       | 0       | NA         |
| CoA           | C00010 | I3sg5 | C13-02     | 21 | 0           | 0           | 0            | 0         | 0       | NA     | 0       | 0       | 0       | 0       | NA         |
| CoA           | C00010 | NT2   | C13-03     | 21 | 3205.07413  | 3886.622776 | 2184.797583  | 1.0214032 | 0.206   | 0.2017 | 0.98165 | 1.24442 | 0.83814 | 1.0214  | 0.03548 *  |
| CoA           | C00010 | I3sg5 | C13-03     | 21 | 1080.644241 | 992.8734239 | 1006.124419  | 0.5880205 | 0.124   | 0.2109 | 0.65502 | 0.44491 | 0.66413 | 0.58802 | 0.03548 *  |
| CoA           | C00010 | NT2   | C13-04     | 21 | 6017.665869 | 4668.940252 | 4222.447894  | 1.6526067 | 0.1764  | 0.1067 | 1.84309 | 1.49491 | 1.61983 | 1.65261 | 0.32929    |
| CoA           | C00010 | I3sg5 | C13-04     | 21 | 3829.76521  | 3177.260597 | 3354.559244  | 1.9864724 | 0.4903  | 0.2688 | 2.32137 | 1.42373 | 2.21431 | 1.98647 | 0.32929    |
| CoA           | C00010 | NT2   | C13-05     | 21 | 196290.3688 | 195234.2223 | 164013.71111 | 61.849794 | 1.5122  | 0.0244 | 60.1197 | 62.5104 | 62.9193 | 61.8498 | 0.22576    |
| CoA           | C00010 | I3sg5 | C13-05     | 21 | 97176.19147 | 137637.166  | 90668.01178  | 60.142244 | 1.4095  | 0.0234 | 58.9024 | 61.6753 | 59.849  | 60.1422 | 0.22576    |
| CoA           | C00010 | NT2   | C13-06     | 21 | 17573.49576 | 8723.113671 | 5027.970309  | 3.3680732 | 1.7972  | 0.5336 | 5.3824  | 2.79298 | 1.92884 | 3.36807 | 0.15061    |
| CoA           | C00010 | I3sg5 | C13-06     | 21 | 2288.742464 | 3001.155444 | 2719.667451  | 1.5091144 | 0.2487  | 0.1648 | 1.3873  | 1.34482 | 1.79522 | 1.50911 | 0.15061    |
| CoA           | C00010 | NT2   | C13-07     | 21 | 0           | 0           | 0            | 0         | 0       | NA     | 0       | 0       | 0       | 0       | NA         |
| CoA           | C00010 | I3sg5 | C13-07     | 21 | 0           | 0           | 0            | 0         | 0       | NA     | 0       | 0       | 0       | 0       | NA         |
| CoA           | C00010 | NT2   | C13-08     | 21 | 109.6562377 | 1812.202904 | 1407.088221  | 0.3845365 | 0.3046  | 0.7921 | 0.03359 | 0.58023 | 0.53979 | 0.38454 | 0.98833    |
| CoA           | C00010 | I3sg5 | C13-08     | 21 | 455.9239134 | 582.9806906 | 918.4751468  | 0.3812879 | 0.195   | 0.5114 | 0.27635 | 0.26123 | 0.60628 | 0.38129 | 0.98833    |
| CoA           | C00010 | NT2   | C13-09     | 21 | 0           | 0           | 0            | 0         | 0       | NA     | 0       | 0       | 0       | 0       | NA         |
| CoA           | C00010 | I3sg5 | C13-09     | 21 | 0           | 0           | 0            | 0         | 0       | NA     | 0       | 0       | 0       | 0       | NA         |
| Creatine      | C00300 | NT2   | C12 PARENT | 4  | 369744217   | 358686421.4 | 212381653.5  | 97.727609 | 0.3017  | 0.0031 | 97.4662 | 97.6589 | 98.0577 | 97.7276 | 0.13067    |
| Creatine      | C00300 | I3sg5 | C12 PARENT | 4  | 222119613.4 | 241482179.1 | 210034931.1  | 98.115455 | 0.1854  | 0.0019 | 98.2235 | 98.2214 | 97.9014 | 98.1155 | 0.13067    |
| Creatine      | C00300 | NT2   | C13-01     | 4  | 0           | 0           | 0            | 0         | 0       | NA     | 0       | 0       | 0       | 0       | NA         |
| Creatine      | C00300 | I3sg5 | C13-01     | 4  | 0           | 0           | 0            | 0         | 0       | NA     | 0       | 0       | 0       | 0       | NA         |
| Creatine      | C00300 | NT2   | C13-02     | 4  | 9612270.265 | 8598366.617 | 4206738.922  | 2.2723906 | 0.3017  | 0.1328 | 2.53384 | 2.34106 | 1.94227 | 2.27239 | 0.13067    |
| Creatine      | C00300 | I3sg5 | C13-02     | 4  | 4017227.402 | 4372756.045 | 4502241.058  | 1.8845446 | 0.1854  | 0.2988 | 1.77646 | 1.77859 | 2.09858 | 1.88454 | 0.13067    |
| Creatinine    | C00791 | NT2   | C12 PARENT | 4  | 912631.6023 | 840591.8736 | 578311.292   | 98.831438 | 1.0028  | 0.0101 | 99.7586 | 97.767  | 98.9687 | 98.8314 | 0.62773    |
| Creatinine    | C00791 | I3sg5 | C12 PARENT | 4  | 266641.5869 | 700156.4136 | 402312.555   | 98.072246 | 2.2984  | 0.0234 | 95.5286 | 100     | 98.6881 | 98.0722 | 0.62773    |
| Creatinine    | C00791 | NT2   | C13-01     | 4  | 2208.810739 | 19198.70702 | 6028.221244  | 1.1885616 | 1.0028  | 0.8582 | 0.24144 | 2.23295 | 1.03129 | 1.18856 | 0.62773    |
| Creatinine    | C00791 | I3sg5 | C13-01     | 4  | 12480.6234  | 101535.2881 | 41487.99893  | 4.2296027 | 2.2984  | 1.1923 | 4.47138 | 0.13188 | 1.92775 | 4.2296  | 0.62773    |
| CTP           | C00063 | NT2   | C12 PARENT | 9  | 1223032.741 | 1041918.343 | 1061645.142  | 41.429129 | 0.967   | 0.0233 | 42.2265 | 40.3535 | 41.7073 | 41.4291 | 0.08621    |
| CTP           | C00063 | I3sg5 | C12 PARENT | 9  | 750548.0477 | 772116.5957 | 493698.2106  | 40.08786  | 0.3421  | 0.0085 | 39.8178 | 39.9733 | 40.4725 | 40.0879 | 0.08621    |
| CTP           | C00063 | NT2   | C13-01     | 9  | 0           | 0           | 0            | 0         | 0       | NA     | 0       | 0       | 0       | 0       | NA         |
| CTP           | C00063 | I3sg5 | C13-01     | 9  | 0           | 0           | 0            | 0         | 0       | NA     | 0       | 0       | 0       | 0       | NA         |
| CTP           | C00063 | NT2   | C13-04     | 9  | 0           | 0           | 0            | 0         | 0       | NA     | 0       | 0       | 0       | 0       | NA         |
| CTP           | C00063 | I3sg5 | C13-04     | 9  | 0           | 0           | 0            | 0         | 0       | NA     | 0       | 0       | 0       | 0       | NA         |
| CTP           | C00063 | NT2   | C13-05     | 9  | 1153918.527 | 1084420.408 | 1028514.502  | 40.748565 | 1.1198  | 0.0275 | 39.8403 | 41.9996 | 40.4058 | 40.7486 | 0.26128    |
| CTP           | C00063 | I3sg5 | C13-05     | 9  | 802798.1866 | 780795.3552 | 547289.8434  | 42.628062 | 2.2218  | 0.0521 | 42.5897 | 40.4227 | 44.8658 | 42.6261 | 0.26128    |
| CTP           | C00063 | NT2   | C13-06     | 9  | 145684.062  | 124075.185  | 113427.0294  | 4.7637935 | 0.2892  | 0.0607 | 5.0299  | 4.80544 | 4.45605 | 4.76379 | 0.83205    |
| CTP           | C00063 | I3sg5 | C13-06     | 9  | 113485.8699 | 73391.7253  | 60028.50756  | 4.9137346 | 1.1105  | 0.226  | 6.0206  | 3.79957 | 4.92103 | 4.91373 | 0.83205    |
| CTP           | C00063 | NT2   | C13-07     | 9  | 279830.881  | 190921.3794 | 214198.5402  | 8.490255  | 1.1354  | 0.1337 | 9.66146 | 7.39439 | 8.41491 | 8.49025 | 0.81781    |
| CTP           | C00063 | I3sg5 | C13-07     | 9  | 142141.7366 | 203739.7973 | 77332.08247  | 8.1427414 | 2.1678  | 0.2662 | 7.54084 | 10.5478 | 6.33954 | 8.14274 | 0.81781    |
| CTP           | C00063 | NT2   | C13-08     | 9  | 93895.85807 | 140639.7345 | 127678.7648  | 4.5682569 | 1.1687  | 0.2558 | 3.24185 | 5.44689 | 5.01593 | 4.56826 | 0.71607    |
| CTP           | C00063 | I3sg5 | C13-08     | 9  | 75984.58117 | 101535.2881 | 41487.99893  | 4.2296027 | 0.9435  | 0.2231 | 4.0311  | 5.2566  | 3.40111 | 4.2296  | 0.71607    |
| Cystathionine | C02291 | NT2   | C12 PARENT | 7  | 1266176.239 | 1122762.697 | 805596.9876  | 53.23166  | 1.5731  | 0.016  | 98.7556 | 99.9672 | 96.8467 | 98.5232 | 0.17927    |
| Cystathionine | C02291 | I3sg5 | C12 PARENT | 7  | 694193.1886 | 724643.6058 | 734288.3905  | 100       | 0       | 0      | 100     | 100     | 100     | 100     | 0.17927    |
| Cystathionine | C02291 | NT2   | C13-01     | 7  | 15954.85351 | 368.9238088 | 26229.59614  | 1.4768339 | 1.5731  | 1.0652 | 1.2444  | 0.03285 | 3.15325 | 1.47683 | 0.17927    |
| Cystathionine | C02291 | I3sg5 | C13-01     | 7  | 0           | 0           | 0            | 0         |         |        |         |         |         |         |            |

|             |        |       |            |    |             |             |             |           |         |        |         |         |         |         |           |
|-------------|--------|-------|------------|----|-------------|-------------|-------------|-----------|---------|--------|---------|---------|---------|---------|-----------|
| Glc         | C00031 | I3sg5 | C12 PARENT | 6  | 215678.6398 | 313356.2146 | 318272.3475 | 1.5646368 | 0.2375  | 0.1518 | 1.29042 | 1.7004  | 1.70309 | 1.56464 | 0.22536   |
| Glc         | C00031 | NT2   | C13-05     | 6  | 288190.4801 | 259402.1027 | 523452.4569 | 1.7276505 | 0.2825  | 0.1635 | 1.65278 | 1.49009 | 2.04009 | 1.72765 | 0.77255   |
| Glc         | C00031 | I3sg5 | C13-05     | 6  | 270119.681  | 360728.6335 | 333797.8858 | 1.7865915 | 0.1707  | 0.0955 | 1.61614 | 1.95747 | 1.78617 | 1.78659 | 0.77255   |
| Glc         | C00031 | NT2   | C13-06     | 6  | 16887968.5  | 16942910.26 | 24798694.84 | 96.942596 | 0.3466  | 0.0036 | 96.8527 | 97.3253 | 96.6498 | 96.9426 | 0.38718   |
| Glc         | C00031 | I3sg5 | C13-06     | 6  | 16228092.67 | 17754265.15 | 18035844.2  | 96.648772 | 0.3942  | 0.0041 | 97.0934 | 96.3421 | 96.5107 | 96.6488 | 0.38718   |
| GlcNac-6P   | C00357 | NT2   | C12 PARENT | 8  | 211322.9568 | 118462.8045 | 156081.0557 | 31.221382 | 7.2932  | 0.2336 | 35.0747 | 22.8098 | 35.7796 | 31.2214 | 0.5976    |
| GlcNac-6P   | C00357 | I3sg5 | C12 PARENT | 8  | 114714.0613 | 83456.25815 | 44831.76296 | 27.312749 | 9.3075  | 0.3408 | 35.0563 | 29.8953 | 16.9866 | 27.3127 | 0.5976    |
| GlcNac-6P   | C00357 | NT2   | C13-06     | 8  | 141043.8294 | 149117.4483 | 138580.7852 | 27.963407 | 4.229   | 0.1512 | 23.41   | 28.7123 | 31.7679 | 27.9634 | 0.35457   |
| GlcNac-6P   | C00357 | I3sg5 | C13-06     | 8  | 72260.11636 | 120736.634  | 108089.8745 | 35.42906  | 11.6153 | 0.3278 | 22.0825 | 43.2497 | 40.955  | 35.4291 | 0.35457   |
| GlcNac-6P   | C00357 | NT2   | C13-08     | 8  | 250126.9339 | 251770.0788 | 141567.023  | 40.815211 | 8.0356  | 0.1969 | 41.5153 | 48.4779 | 32.4525 | 40.8152 | 0.63687   |
| GlcNac-6P   | C00357 | I3sg5 | C13-08     | 8  | 140253.9239 | 74968.84351 | 111002.0016 | 37.258191 | 9.0184  | 0.2421 | 42.8612 | 26.855  | 42.0584 | 37.2582 | 0.63687   |
| Gln         | C00064 | NT2   | C12 PARENT | 5  | 713428254.4 | 756114748.8 | 763240843.5 | 99.56109  | 0.0874  | 0.0009 | 99.5161 | 99.5053 | 99.6618 | 99.5611 | 0.83951   |
| Gln         | C00064 | I3sg5 | C12 PARENT | 5  | 512958964.5 | 641060554.7 | 431880066.1 | 99.577498 | 0.0983  | 0.001  | 99.6695 | 99.4739 | 99.5891 | 99.5775 | 0.83951   |
| Gln         | C00064 | NT2   | C13-01     | 5  | 270255.9304 | 153316.856  | 237477.5036 | 0.0296279 | 0.0088  | 0.2984 | 0.0377  | 0.02018 | 0.03101 | 0.02963 | 0.70901   |
| Gln         | C00064 | I3sg5 | C13-01     | 5  | 0           | 959441.5284 | 0           | 0.0496258 | 0.086   | 1.7321 | 0       | 0.14888 | 0       | 0.04963 | 0.70901   |
| Gln         | C00064 | NT2   | C13-02     | 5  | 0           | 0           | 0           | 0         | 0       | NA     | 0       | 0       | 0       | 0       | NA        |
| Gln         | C00064 | I3sg5 | C13-02     | 5  | 0           | 0           | 0           | 0         | 0       | NA     | 0       | 0       | 0       | 0       | NA        |
| Gln         | C00064 | NT2   | C13-03     | 5  | 811779.0268 | 1231560.505 | 565771.35   | 0.1163954 | 0.0442  | 0.3796 | 0.11324 | 0.16207 | 0.07388 | 0.1164  | 0.34867   |
| Gln         | C00064 | I3sg5 | C13-03     | 5  | 217910.0287 | 669499.5145 | 433724.315  | 0.0820806 | 0.0345  | 0.42   | 0.04234 | 0.10389 | 0.10001 | 0.08208 | 0.34867   |
| Gln         | C00064 | NT2   | C13-04     | 5  | 1439610.478 | 1293671.176 | 1281589.185 | 0.1794686 | 0.0185  | 0.1033 | 0.20081 | 0.17025 | 0.16735 | 0.17947 | 0.34218   |
| Gln         | C00064 | I3sg5 | C13-04     | 5  | 832122.4791 | 1060110.189 | 759698.5438 | 0.1671214 | 0.0071  | 0.0426 | 0.16168 | 0.1645  | 0.17518 | 0.16712 | 0.34218   |
| Gln         | C00064 | NT2   | C13-05     | 5  | 947290.0144 | 1080191.547 | 505158.9378 | 0.1134179 | 0.0414  | 0.365  | 0.13214 | 0.14215 | 0.06596 | 0.11342 | 0.70449   |
| Gln         | C00064 | I3sg5 | C13-05     | 5  | 651094.4127 | 701392.1853 | 588383.432  | 0.1236744 | 0.0136  | 0.1103 | 0.12651 | 0.10884 | 0.13568 | 0.12367 | 0.70449   |
| Glu         | C00025 | NT2   | C12 PARENT | 5  | 339456146.7 | 269539866.9 | 293720932.9 | 63.037251 | 1.1437  | 0.0181 | 62.4004 | 62.3537 | 64.3573 | 63.0373 | 0.03388 * |
| Glu         | C00025 | I3sg5 | C12 PARENT | 5  | 237804638.8 | 293724588.1 | 199666638   | 65.31507  | 0.4915  | 0.0075 | 65.6468 | 65.548  | 64.7505 | 65.3151 | 0.03388 * |
| Glu         | C00025 | NT2   | C13-01     | 5  | 6752858.665 | 6630254.264 | 5175992.006 | 1.303088  | 0.2069  | 0.1588 | 1.24134 | 1.5338  | 1.13412 | 1.30309 | 0.29542   |
| Glu         | C00025 | I3sg5 | C13-01     | 5  | 4106498.242 | 5179008.983 | 3655794.465 | 1.1583051 | 0.0261  | 0.0225 | 1.13361 | 1.15575 | 1.18555 | 1.15831 | 0.29542   |
| Glu         | C00025 | NT2   | C13-02     | 5  | 100206934   | 79682977.75 | 82003006.76 | 18.273894 | 0.2652  | 0.0145 | 18.4205 | 18.4334 | 17.9678 | 18.2739 | 0.03181 * |
| Glu         | C00025 | I3sg5 | C13-02     | 5  | 61407043.9  | 77702191.11 | 54820312.07 | 17.356528 | 0.4133  | 0.0238 | 16.9516 | 17.3401 | 17.7778 | 17.3565 | 0.03181 * |
| Glu         | C00025 | NT2   | C13-03     | 5  | 29014394.05 | 22574821.28 | 22346648.23 | 5.1507634 | 0.2272  | 0.0441 | 5.33356 | 5.22232 | 4.89641 | 5.15076 | 0.08346   |
| Glu         | C00025 | I3sg5 | C13-03     | 5  | 17407610.16 | 21610755.91 | 15108631.77 | 4.8425787 | 0.0501  | 0.0104 | 4.80543 | 4.82269 | 4.89962 | 4.84258 | 0.08346   |
| Glu         | C00025 | NT2   | C13-04     | 5  | 41878392.24 | 33331254.67 | 32656732.39 | 7.5214654 | 0.317   | 0.0421 | 7.69828 | 7.71065 | 7.15547 | 7.52147 | 0.02545 * |
| Glu         | C00025 | I3sg5 | C13-04     | 5  | 25004303.75 | 29553089.69 | 21245779.16 | 6.795828  | 0.1739  | 0.0256 | 6.90252 | 6.59511 | 6.88985 | 6.79583 | 0.02545 * |
| Glu         | C00025 | NT2   | C13-05     | 5  | 26688235.97 | 20516153.89 | 20485352.58 | 4.713538  | 0.2106  | 0.0447 | 4.90595 | 4.74608 | 4.48858 | 4.71354 | 0.21335   |
| Glu         | C00025 | I3sg5 | C13-05     | 5  | 16518655.96 | 20336669.19 | 13866114.31 | 4.5316903 | 0.0322  | 0.0071 | 4.56003 | 4.53836 | 4.49668 | 4.53169 | 0.21335   |
| GlucA       | C00191 | NT2   | C12 PARENT | 6  | 9660.636463 | 9622.806175 | 0           | 12.192148 | 10.5935 | 0.8689 | 19.1457 | 17.4307 | 0       | 12.1921 | 0.81347   |
| GlucA       | C00191 | I3sg5 | C12 PARENT | 6  | 0           | 17496.80148 | 0           | 9.3720597 | 16.2329 | 1.7321 | 0       | 28.1162 | 0       | 9.37206 | 0.81347   |
| GlucA       | C00191 | NT2   | C13-06     | 6  | 40797.8572  | 45583.16345 | 58997.95886 | 87.807852 | 10.5935 | 0.1206 | 80.8543 | 82.5693 | 100     | 87.8079 | 0.81347   |
| GlucA       | C00191 | I3sg5 | C13-06     | 6  | 20219.10337 | 44733.56597 | 17435.57127 | 90.62794  | 16.2329 | 0.1791 | 100     | 71.8838 | 100     | 90.6279 | 0.81347   |
| Gly         | C00037 | NT2   | C12 PARENT | 2  | 14284660.67 | 13306448.2  | 12272274.82 | 94.468679 | 0.3734  | 0.004  | 94.0664 | 94.8043 | 94.5353 | 94.4687 | 0.13508   |
| Gly         | C00037 | I3sg5 | C12 PARENT | 2  | 8011783.522 | 10514590.14 | 8279618.795 | 95.142253 | 0.5004  | 0.0053 | 95.7201 | 94.8533 | 94.8533 | 95.1423 | 0.13508   |
| Gly         | C00037 | NT2   | C13-01     | 2  | 0           | 0           | 0           | 0         | 0       | NA     | 0       | 0       | 0       | 0       | NA        |
| Gly         | C00037 | I3sg5 | C13-01     | 2  | 0           | 0           | 0           | 0         | 0       | NA     | 0       | 0       | 0       | 0       | NA        |
| Gly         | C00037 | NT2   | C13-02     | 2  | 901059.5874 | 729252.4625 | 735444.1267 | 5.5313206 | 0.3734  | 0.0675 | 5.9336  | 5.1957  | 5.46467 | 5.53132 | 0.13508   |
| Gly         | C00037 | I3sg5 | C13-02     | 2  | 358226.4102 | 50513.5886  | 449247.8433 | 4.8577469 | 0.5004  | 0.103  | 4.27988 | 5.14667 | 5.14669 | 4.85775 | 0.13508   |
| Glycerol-3P | C00093 | NT2   | C12 PARENT | 3  | 563828.2995 | 433593.3172 | 998476.5108 | 37.897788 | 2.2544  | 0.0595 | 38.4718 | 35.4118 | 39.8098 | 37.8978 | 0.64117   |
| Glycerol-3P | C00093 | I3sg5 | C12 PARENT | 3  | 1031047.71  | 920848.0701 | 661340.7024 | 37.035546 | 1.9289  | 0.0521 | 35.8801 | 35.9642 | 39.2623 | 37.0355 | 0.64117   |
| Glycerol-3P | C00093 | NT2   | C13-03     | 3  | 901735.8594 | 790836.8757 | 1909643.307 | 62.102212 | 2.2544  | 0.0363 | 61.5282 | 64.5882 | 60.1902 | 62.1022 | 0.64117   |
| Glycerol-3P | C00093 | I3sg5 | C13-03     | 3  | 1842543.435 | 1639609.45  | 1023074.799 | 62.964454 | 1.9289  | 0.0306 | 64.1199 | 64.0358 | 60.7377 | 62.9645 | 0.64117   |
| GMP         | C00144 | NT2   | C12 PARENT | 10 | 136007.471  | 196444.1846 | 202531.6769 | 11.24924  | 2.402   | 0.2135 | 8.47565 | 12.6359 | 12.6359 | 11.2492 | 0.60084   |
| GMP         | C00144 | I3sg5 | C12 PARENT | 10 | 114356.4045 | 198696.0546 | 51610.9794  | 13.263334 | 5.6609  | 0.4268 | 16.6282 | 16.4341 | 6.72769 | 13.2633 | 0.60084   |
| GMP         | C00144 | NT2   | C13-04     | 10 | 2146.260335 | 52128.29197 | 58173.39864 | 2.3720995 | 1.9434  | 0.8193 | 0.13375 | 3.35312 | 3.62943 | 2.3721  | 0.40856   |
| GMP         | C00144 | I3sg5 | C13-04     | 10 | 18148.39716 | 8204.809271 | 0           | 1.1058404 | 1.3703  | 1.2392 | 2.6389  | 0.67862 | 0       | 1.10584 | 0.40856   |
| GMP         | C00144 | NT2   | C13-05     | 10 | 1331488.97  | 1233788.719 | 1263244.072 | 80.383797 | 2.2609  | 0.0281 | 82.9751 | 79.3628 | 78.8135 | 80.3838 | 0.32645   |
| GMP         | C00144 | I3sg5 | C13-05     | 10 | 549667.5645 | 995207.0608 | 691368.4922 | 84.120446 | 5.3333  | 0.0634 | 79.9255 | 82.3133 | 90.1226 | 84.1204 | 0.32645   |
| GMP         | C00144 | NT2   | C13-06     | 10 | 133722.0733 | 60691.0127  | 78877.23613 | 5.719426  | 2.3201  | 0.4056 | 8.33323 | 3.90392 | 4.92113 | 5.71943 | 0.05398   |
| GMP         | C00144 | I3sg5 | C13-06     | 10 | 2865.225468 | 6940.362344 | 24163.02807 | 1.3801345 | 1.5345  | 1.1119 | 0.41662 | 0.57404 | 3.14974 | 1.38013 | 0.05398   |
| GMP         | C00144 | NT2   | C13-07     | 10 | 1320.239703 | 11566.99131 | 0           | 0.2754304 | 0.4079  | 1.4809 | 0.08227 | 0.74404 | 0       | 0.27544 | 0.61816   |
| GMP         | C00144 | I3sg5 | C13-07     | 10 | 2687.180592 | 0           | 0           | 0.130245  | 0.2256  | 1.7321 | 0.39073 | 0       | 0       | 0.13024 | 0.61816   |
| GSH         | C00051 | NT2   | C12 PARENT | 10 | 77573593.43 | 73623339.68 | 66116659.54 | 69.359623 | 1.511   | 0.0218 | 68.2856 | 68.7058 | 71.0875 | 69.3596 | 0.08177   |
| GSH         | C00051 | I3sg5 | C12 PARENT | 10 | 49241308.67 | 55333446.54 | 39496041.63 | 72.510974 | 1.8127  | 0.025  | 73.2109 | 73.8694 | 70.4526 | 72.511  | 0.08177   |
| GSH         | C00051 | NT2   | C13-01     | 10 | 0           | 0           | 0           | 0         | 0       | NA     | 0       | 0       | 0       | 0       | NA        |
| GSH         | C00051 | I3sg5 | C13-01     | 10 | 0           | 0           | 0           | 0         | 0       | NA     | 0       | 0       | 0       | 0       | NA        |
| GSH         | C00051 | NT2   | C13-02     | 10 | 21518585.86 | 20392768.7  | 16543176.99 | 18.58658  | 0.6939  | 0.0373 | 18.9421 | 19.0307 | 17.7869 | 18.5866 | 0.09115   |
| GSH         | C00051 | I3sg5 | C13-02     | 10 | 10901076.66 | 11521551.65 | 10165995.05 | 16.574197 | 1.4126  | 0.0852 | 16.2075 | 15.3811 | 18.134  | 16.5742 | 0.09115   |
| GSH         | C00051 | NT2   | C13-03     | 10 | 3989767.426 | 3549190.253 | 2914544.402 | 3.3192875 | 0.1893  | 0.057  | 3.51207 | 3.31213 | 3.13367 | 3.31929 | 0.31993   |
| GSH         | C00051 | I3sg5 | C13-03     | 10 | 1936476.487 | 2352681.765 | 1875929.589 | 3.1220575 | 0.2341  | 0.075  | 2.87911 | 3.1408  | 3.34626 | 3.12206 | 0.31993   |
| GSH         | C00051 | NT2   | C13-04     | 10 | 6736884.181 | 6350297.732 | 4935399.907 | 5.7209546 | 0.359   | 0.0627 | 5.93027 | 5.92614 | 5.30646 | 5.72095 | 0.04936 * |
| GSH         | C00051 | I3sg5 | C13-04     | 10 | 3405504.11  | 3665331.43  | 2948452.953 | 5.0719386 | 0.1833  | 0.0361 | 5.06323 | 4.89317 | 5.25942 |         |           |

|      |        |       |            |    |             |             |             |            |        |        |         |         |         |         |             |
|------|--------|-------|------------|----|-------------|-------------|-------------|------------|--------|--------|---------|---------|---------|---------|-------------|
| GTP  | C00044 | NT2   | C13-02     | 10 | 249028.8823 | 180283.3377 | 172241.6384 | 0.5819543  | 0.1102 | 0.1893 | 0.67174 | 0.61512 | 0.459   | 0.58195 | 0.37272     |
| GTP  | C00044 | I3sg5 | C13-02     | 10 | 40520.66532 | 93776.67252 | 107146.6205 | 0.41199026 | 0.2573 | 0.6128 | 0.17273 | 0.40069 | 0.68629 | 0.4199  | 0.37272     |
| GTP  | C00044 | NT2   | C13-03     | 10 | 201523.3889 | 258187.7229 | 377216.0705 | 0.8099198  | 0.2389 | 0.2949 | 0.5436  | 0.88093 | 1.00524 | 0.80992 | 0.27494     |
| GTP  | C00044 | I3sg5 | C13-03     | 10 | 293425.4572 | 352098.1005 | 110481.4694 | 1.1542992  | 0.4071 | 0.3527 | 1.25081 | 1.50443 | 0.70765 | 1.1543  | 0.27494     |
| GTP  | C00044 | NT2   | C13-04     | 10 | 770490.5615 | 671407.4617 | 469377.2087 | 1.8733336  | 0.5495 | 0.2933 | 2.07835 | 2.29082 | 1.25083 | 1.87333 | 0.0588      |
| GTP  | C00044 | I3sg5 | C13-04     | 10 | 163713.9135 | 302017.5293 | 62944.06035 | 0.7971655  | 0.4519 | 0.5669 | 0.69788 | 1.29045 | 0.40317 | 0.79717 | 0.0588      |
| GTP  | C00044 | NT2   | C13-05     | 10 | 27998367.24 | 22447335.72 | 29312290.99 | 76.742347  | 1.3017 | 0.017  | 75.5238 | 76.5895 | 78.1138 | 76.7423 | 0.429       |
| GTP  | C00044 | I3sg5 | C13-05     | 10 | 18711892.22 | 17444742.38 | 12219197.13 | 77.950004  | 1.9918 | 0.0256 | 79.765  | 75.8192 | 78.2658 | 77.95   | 0.429       |
| GTP  | C00044 | NT2   | C13-06     | 10 | 2976464.199 | 1789908.797 | 2136438.595 | 6.6097592  | 1.2462 | 0.1885 | 8.02882 | 6.1071  | 5.69335 | 6.60976 | 0.217       |
| GTP  | C00044 | I3sg5 | C13-06     | 10 | 747470.535  | 977553.8293 | 1059691.07  | 4.7168866  | 1.8603 | 0.3944 | 3.18632 | 4.17686 | 6.98748 | 4.71689 | 0.217       |
| GTP  | C00044 | NT2   | C13-07     | 10 | 890476.6279 | 531776.0261 | 790928.7718 | 2.1080448  | 0.2938 | 0.1394 | 2.402   | 1.8144  | 2.10773 | 2.10804 | 0.15306     |
| GTP  | C00044 | I3sg5 | C13-07     | 10 | 405007.5764 | 451775.6377 | 182911.5156 | 1.6094581  | 0.3927 | 0.244  | 1.72647 | 1.93033 | 1.17158 | 1.60946 | 0.15306     |
| GTP  | C00044 | NT2   | C13-08     | 10 | 8907.160807 | 0           | 63174.49994 | 0.0641263  | 0.0911 | 1.42   | 0.02403 | 0       | 0.16835 | 0.06413 | 0.28955     |
| GTP  | C00044 | I3sg5 | C13-08     | 10 | 0           | 0           | 0           | 0          | 0      | NA     | 0       | 0       | 0       | 0       | 0.28955     |
| IMP  | C00130 | NT2   | C12 PARENT | 10 | 59940.84125 | 98449.25236 | 75310.96383 | 17.40287   | 2.6025 | 0.1495 | 14.6039 | 19.7497 | 17.8551 | 17.4029 | 0.44135     |
| IMP  | C00130 | I3sg5 | C12 PARENT | 10 | 38253.50786 | 108771.741  | 22277.88623 | 13.740766  | 6.9587 | 0.5064 | 10.3847 | 21.7415 | 9.09613 | 13.7408 | 0.44135     |
| IMP  | C00130 | NT2   | C13-05     | 10 | 350504.5348 | 400036.7579 | 346478.5487 | 82.59713   | 2.6025 | 0.0315 | 85.3961 | 80.2503 | 82.1449 | 82.5971 | 0.44135     |
| IMP  | C00130 | I3sg5 | C13-05     | 10 | 330110.9036 | 391524.4088 | 222638.0915 | 86.259234  | 6.9587 | 0.0807 | 89.6153 | 78.2585 | 90.9039 | 86.2592 | 0.44135     |
| Lac  | C00186 | NT2   | C12 PARENT | 3  | 2282324.339 | 1544608.714 | 1982256.606 | 19.378653  | 2.8295 | 0.146  | 22.3165 | 19.1478 | 16.6716 | 19.3787 | 0.96021     |
| Lac  | C00186 | I3sg5 | C12 PARENT | 3  | 1214854.225 | 1982800.644 | 1114513.847 | 19.260836  | 2.6016 | 0.1351 | 20.2828 | 21.1963 | 16.3034 | 19.2608 | 0.96021     |
| Lac  | C00186 | NT2   | C13-02     | 3  | 92415.53561 | 42155.69952 | 204090.1093 | 1.0475686  | 0.6098 | 0.5821 | 0.90364 | 0.52259 | 1.71648 | 1.04757 | 0.37858     |
| Lac  | C00186 | I3sg5 | C13-02     | 3  | 0           | 131379.2728 | 0           | 0.4681523  | 0.8109 | 1.7321 | 0       | 1.40446 | 0       | 0.46815 | 0.37858     |
| Lac  | C00186 | NT2   | C13-03     | 3  | 7852324.683 | 6479987.999 | 9703670.05  | 79.573779  | 2.5031 | 0.0315 | 76.7798 | 80.3296 | 81.6119 | 79.5738 | 0.78046     |
| Lac  | C00186 | I3sg5 | C13-03     | 3  | 4774734.42  | 7240274.613 | 5721561.673 | 80.271012  | 3.185  | 0.0397 | 79.7172 | 77.3992 | 83.6966 | 80.271  | 0.78046     |
| Mal  | C00149 | NT2   | C12 PARENT | 4  | 46151175.87 | 44124817.66 | 39924937.9  | 65.385934  | 0.9308 | 0.0142 | 64.3213 | 65.7906 | 66.0459 | 65.3859 | 0.5587      |
| Mal  | C00149 | I3sg5 | C12 PARENT | 4  | 30295339.12 | 31169693.36 | 24975234.64 | 65.887955  | 0.9982 | 0.0151 | 66.871  | 65.9176 | 64.8753 | 65.888  | 0.5587      |
| Mal  | C00149 | NT2   | C13-01     | 4  | 1594239.12  | 1207377.697 | 1168132.937 | 1.9848349  | 0.2157 | 0.1087 | 2.22191 | 1.80021 | 1.93238 | 1.98483 | 0.98382     |
| Mal  | C00149 | I3sg5 | C13-01     | 4  | 717947.0608 | 1071263.992 | 804131.5617 | 1.9796776  | 0.3533 | 0.1784 | 1.58473 | 2.26551 | 2.0888  | 1.97968 | 0.98382     |
| Mal  | C00149 | NT2   | C13-02     | 4  | 11441310.16 | 10336683.72 | 8998244.963 | 15.414443  | 0.5303 | 0.0344 | 15.9459 | 15.4121 | 14.8854 | 15.4144 | 0.60997     |
| Mal  | C00149 | I3sg5 | C13-02     | 4  | 6315938.727 | 6863661.534 | 6327744.235 | 14.964432  | 1.3071 | 0.0873 | 13.9412 | 14.5153 | 16.4369 | 14.9644 | 0.60997     |
| Mal  | C00149 | NT2   | C13-03     | 4  | 8782247.813 | 8026344.563 | 7261689.461 | 12.07331   | 0.146  | 0.0121 | 12.2399 | 11.6754 | 12.0127 | 12.0733 | 0.54879     |
| Mal  | C00149 | I3sg5 | C13-03     | 4  | 5538524.542 | 5770557.647 | 4621946.867 | 12.144887  | 0.1209 | 0.01   | 12.2252 | 12.2036 | 12.0059 | 12.1449 | 0.54879     |
| Mal  | C00149 | NT2   | C13-04     | 4  | 3782022.227 | 3373308.038 | 3097324.886 | 5.1204778  | 0.1217 | 0.0237 | 5.27104 | 5.02964 | 5.12375 | 5.12148 | 0.64771     |
| Mal  | C00149 | I3sg5 | C13-04     | 4  | 2436401.154 | 2410680.195 | 1768246.796 | 5.0340489  | 0.3977 | 0.0792 | 5.37788 | 5.09891 | 4.59317 | 5.02305 | 0.64771     |
| Met  | C00073 | NT2   | C12 PARENT | 5  | 33880300.87 | 34575815.07 | 24790073.89 | 99.066426  | 0.309  | 0.0031 | 98.9959 | 98.7988 | 99.4046 | 99.0664 | 0.72249     |
| Met  | C00073 | I3sg5 | C12 PARENT | 5  | 28414811.23 | 25204192.14 | 30656477.28 | 99.156643  | 0.2695 | 0.0027 | 99.4608 | 99.0616 | 98.9475 | 99.1566 | 0.72249     |
| Met  | C00073 | NT2   | C13-01     | 5  | 0           | 0           | 0           | 0          | 0      | NA     | 0       | 0       | 0       | 0       | NA          |
| Met  | C00073 | I3sg5 | C13-01     | 5  | 0           | 0           | 0           | 0          | 0      | NA     | 0       | 0       | 0       | 0       | NA          |
| Met  | C00073 | NT2   | C13-04     | 5  | 343648.1611 | 420365.4189 | 148492.1942 | 0.9335744  | 0.309  | 0.331  | 1.00412 | 1.20118 | 0.59543 | 0.93357 | 0.72249     |
| Met  | C00073 | I3sg5 | C13-04     | 5  | 154040.9848 | 238759.1569 | 326081.5886 | 0.8433567  | 0.2695 | 0.3196 | 0.53919 | 0.93841 | 1.05247 | 0.84336 | 0.72249     |
| MTA  | C00170 | NT2   | C12 PARENT | 11 | 393772.183  | 234272.9379 | 185897.0001 | 18.892694  | 1.159  | 0.0613 | 19.7648 | 17.5775 | 19.3358 | 18.8927 | 0.34102     |
| MTA  | C00170 | I3sg5 | C12 PARENT | 11 | 104044.2899 | 287757.2968 | 169077.8313 | 20.21451   | 1.7756 | 0.0878 | 19.3889 | 22.2526 | 19.0021 | 20.2145 | 0.34102     |
| MTA  | C00170 | NT2   | C13-01     | 11 | 0           | 0           | 0           | 0          | 0      | NA     | 0       | 0       | 0       | 0       | NA          |
| MTA  | C00170 | I3sg5 | C13-01     | 11 | 0           | 0           | 0           | 0          | 0      | NA     | 0       | 0       | 0       | 0       | NA          |
| MTA  | C00170 | NT2   | C13-02     | 11 | 11691.12485 | 5861.809752 | 5143.356656 | 0.520536   | 0.0746 | 0.1432 | 0.58682 | 0.43981 | 0.53498 | 0.52054 | 0.00046 *** |
| MTA  | C00170 | I3sg5 | C13-02     | 11 | 0           | 772.832118  | 0           | 0.0199213  | 0.0345 | 1.7321 | 0       | 0.05976 | 0       | 0.01992 | 0.00046 *** |
| MTA  | C00170 | NT2   | C13-03     | 11 | 4386.901268 | 3531.827039 | 3210.637575 | 0.2730454  | 0.0573 | 0.2099 | 0.22019 | 0.26499 | 0.33395 | 0.27305 | 0.14715     |
| MTA  | C00170 | I3sg5 | C13-03     | 11 | 0           | 3649.61256  | 0           | 0.0940761  | 0.1629 | 1.7321 | 0       | 0.28223 | 0       | 0.09408 | 0.14715     |
| MTA  | C00170 | NT2   | C13-04     | 11 | 30730.38913 | 12785.20604 | 16616.83315 | 1.4100377  | 0.4013 | 0.2846 | 1.54247 | 0.95927 | 1.72837 | 1.41004 | 0.76659     |
| MTA  | C00170 | I3sg5 | C13-04     | 11 | 0           | 12045.30625 | 22724.30392 | 1.1611794  | 1.2924 | 1.1124 | 0       | 0.93148 | 2.55391 | 1.16179 | 0.76659     |
| MTA  | C00170 | NT2   | C13-05     | 11 | 1442334.018 | 994644.5394 | 693105.4187 | 73.038737  | 1.3848 | 0.019  | 72.3959 | 74.6281 | 72.0922 | 73.0387 | 0.94985     |
| MTA  | C00170 | I3sg5 | C13-05     | 11 | 406241.1834 | 911696.7855 | 645685.6302 | 72.924264  | 2.6191 | 0.0359 | 75.704  | 70.5025 | 72.5664 | 72.9243 | 0.94985     |
| MTA  | C00170 | NT2   | C13-06     | 11 | 109372.1729 | 81704.82381 | 57442.27659 | 5.86495    | 0.3341 | 0.057  | 5.48978 | 6.13031 | 5.97476 | 5.86495 | 0.51429     |
| MTA  | C00170 | I3sg5 | C13-06     | 11 | 26332.68658 | 77219.86093 | 52298.56023 | 5.5854339  | 0.5893 | 0.1055 | 4.90716 | 5.97149 | 5.87765 | 5.58543 | 0.51429     |
| NAD+ | C00003 | NT2   | C12 PARENT | 21 | 103488.936  | 114924.2041 | 87115.3312  | 3.1952744  | 0.1773 | 0.0555 | 3.0225  | 3.37678 | 3.18654 | 3.19527 | 0.64793     |
| NAD+ | C00003 | I3sg5 | C12 PARENT | 21 | 70568.12653 | 101208.3373 | 47281.44665 | 3.0906975  | 0.3219 | 0.1042 | 2.77327 | 3.4169  | 3.08192 | 3.0907  | 0.64793     |
| NAD+ | C00003 | NT2   | C13-04     | 21 | 42137.05214 | 28481.57464 | 14176.89116 | 0.8620298  | 0.3567 | 0.4138 | 1.23066 | 0.83686 | 0.51857 | 0.86203 | 0.72354     |
| NAD+ | C00003 | I3sg5 | C13-04     | 21 | 23218.26753 | 31405.1793  | 3733.022587 | 0.7386861  | 0.4353 | 0.5893 | 0.91246 | 1.06027 | 0.24333 | 0.73869 | 0.72354     |
| NAD+ | C00003 | NT2   | C13-05     | 21 | 949338.593  | 916750.0395 | 796259.7941 | 27.929637  | 1.1087 | 0.0397 | 27.7264 | 26.9366 | 29.1259 | 27.9296 | 0.64897     |
| NAD+ | C00003 | I3sg5 | C13-05     | 21 | 741323.8656 | 885243.1422 | 407116.6651 | 28.519014  | 1.7574 | 0.0616 | 29.1334 | 29.8867 | 26.5369 | 28.519  | 0.64897     |
| NAD+ | C00003 | NT2   | C13-06     | 21 | 0           | 0           | 0           | 0          | 0      | NA     | 0       | 0       | 0       | 0       | 0.04129 *   |
| NAD+ | C00003 | I3sg5 | C13-06     | 21 | 5205.643024 | 8712.77012  | 9474.762046 | 0.3721062  | 0.2173 | 0.5839 | 0.20458 | 0.29415 | 0.61759 | 0.37211 | 0.04129 *   |
| NAD+ | C00003 | NT2   | C13-07     | 21 | 58604.99468 | 55662.28063 | 52495.328   | 1.7557741  | 0.1474 | 0.0839 | 1.71162 | 1.63551 | 1.9202  | 1.75577 | 0.009 **    |
| NAD+ | C00003 | I3sg5 | C13-07     | 21 | 29225.46432 | 40391.10018 | 17146.38219 | 1.2099423  | 0.134  | 0.1108 | 1.14854 | 1.36365 | 1.11764 | 1.20994 | 0.009 **    |
| NAD+ | C00003 | NT2   | C13-08     | 21 | 40863.6729  | 59975.28974 | 20808.9137  | 1.2389525  | 0.5021 | 0.4053 | 1.19347 | 1.76223 | 0.76116 | 1.23895 | 0.13175     |
| NAD+ | C00003 | I3sg5 | C13-08     | 21 | 60808.08525 | 59131.05701 | 23221.86641 | 1.9665646  | 0.4388 | 0.2231 | 2.38971 | 1.99633 | 1.51366 | 1.96656 | 0.13175     |
| NAD+ | C00003 | NT2   | C13-09     | 21 | 95583.94302 | 91652.57496 | 88554.77628 | 2.9079399  | 0.2911 | 0.1001 | 2.79163 | 2.693   | 3.23919 | 2.90794 | 0.1892      |
| NAD+ | C00003 | I3sg5 | C13-09     | 21 | 46912.03448 | 83336.4089  | 38293.83693 | 2.3844058  | 0.4945 | 0.2074 | 1.8436  | 2.81352 | 2.49609 | 2.38441 | 0.1892      |
| NAD+ | C00003 | NT2   | C13-10     | 21 | 1909805.045 | 190349.524  | 1553471.102 | 56.83183   | 1.0582 | 0.0186 | 55.7778 | 57.8941 |         |         |             |



|               |        |       |            |    |              |             |             |           |        |        |         |         |         |         |            |
|---------------|--------|-------|------------|----|--------------|-------------|-------------|-----------|--------|--------|---------|---------|---------|---------|------------|
| NADP+         | C00006 | I3sg5 | C13-05     | 21 | 57863.38276  | 92543.75107 | 19141.69671 | 30.23809  | 1.8541 | 0.0613 | 31.9329 | 30.5236 | 28.2578 | 30.2381 | 0.54182    |
| NADP+         | C00006 | NT2   | C13-06     | 21 | 0            | 0           | 0           | 0         | 0      | NA     | 0       | 0       | 0       | 0       | NA         |
| NADP+         | C00006 | I3sg5 | C13-06     | 21 | 0            | 0           | 0           | 0         | 0      | NA     | 0       | 0       | 0       | 0       | NA         |
| NADP+         | C00006 | NT2   | C13-07     | 21 | 6188.203552  | 3568.646971 | 3141.007597 | 1.1652443 | 0.229  | 0.1965 | 1.40244 | 0.94554 | 1.14776 | 1.16524 | 0.82078    |
| NADP+         | C00006 | I3sg5 | C13-07     | 21 | 2068.037899  | 4599.120952 | 424.9154325 | 1.0951609 | 0.4466 | 0.4078 | 1.14128 | 1.51692 | 0.62728 | 1.09516 | 0.82078    |
| NADP+         | C00006 | NT2   | C13-08     | 21 | 8548.416299  | 8118.981842 | 4816.762071 | 1.9495363 | 0.1958 | 0.1004 | 1.93734 | 2.15118 | 1.76009 | 1.94954 | 0.46403    |
| NADP+         | C00006 | I3sg5 | C13-08     | 21 | 3478.503182  | 5550.550629 | 2186.052127 | 2.3258484 | 0.7818 | 0.3361 | 1.91967 | 1.83073 | 3.22714 | 2.32585 | 0.46403    |
| NADP+         | C00006 | NT2   | C13-09     | 21 | 10424.60947  | 8821.80329  | 7539.066973 | 2.4849292 | 0.2341 | 0.0942 | 2.36254 | 2.33739 | 2.75485 | 2.48493 | 0.26471    |
| NADP+         | C00006 | I3sg5 | C13-09     | 21 | 4709.108096  | 6108.318295 | 1013.753466 | 2.0366823 | 0.5515 | 0.2708 | 2.5988  | 2.0147  | 1.49655 | 2.03668 | 0.26471    |
| NADP+         | C00006 | NT2   | C13-10     | 21 | 251112.1069  | 204676.8245 | 157673.0065 | 56.251874 | 1.7858 | 0.0317 | 56.9099 | 54.2304 | 57.6153 | 56.2519 | 0.92332    |
| NADP+         | C00006 | I3sg5 | C13-10     | 21 | 96129.1382   | 169601.072  | 40985.32519 | 56.49803  | 3.7581 | 0.0665 | 53.0505 | 55.9393 | 60.5043 | 56.498  | 0.92332    |
| NADP+         | C00006 | NT2   | C13-11     | 21 | 8683.395159  | 13753.12201 | 5477.345582 | 2.5377948 | 0.9581 | 0.3775 | 1.96793 | 3.64398 | 2.00148 | 2.53779 | 0.85762    |
| NADP+         | C00006 | I3sg5 | C13-11     | 21 | 5803.991027  | 10099.18156 | 307.7357919 | 2.3294418 | 1.6252 | 0.6977 | 3.20303 | 3.331   | 0.45429 | 2.32944 | 0.85762    |
| NADP+         | C00006 | NT2   | C13-12     | 21 | 8888.219171  | 4521.314718 | 2757.479064 | 1.4066373 | 0.5348 | 0.3802 | 2.01435 | 1.19795 | 1.00761 | 1.40664 | 0.22894    |
| NADP+         | C00006 | I3sg5 | C13-12     | 21 | 1941.292391  | 1665.018997 | 735.3496411 | 0.9020203 | 0.3057 | 0.3389 | 1.07134 | 0.54917 | 1.08555 | 0.90202 | 0.22894    |
| Orotate       | C00295 | NT2   | C12 PARENT | 5  | 2005618.673  | 1783282.924 | 1043646.18  | 72.628266 | 1.5418 | 0.0212 | 72.98   | 70.941  | 73.9638 | 72.6283 | 0.06835    |
| Orotate       | C00295 | I3sg5 | C12 PARENT | 5  | 691725.658   | 1508821.48  | 586996.7178 | 68.837512 | 2.1546 | 0.0313 | 68.6952 | 71.0598 | 66.7576 | 68.8375 | 0.06835    |
| Orotate       | C00295 | NT2   | C13-01     | 5  | 0            | 16024.92297 | 3601.577509 | 0.2975784 | 0.3208 | 1.0782 | 0       | 0.63749 | 0.25525 | 0.29758 | 0.73446    |
| Orotate       | C00295 | I3sg5 | C13-01     | 5  | 6003.994871  | 0           | 0           | 0.198752  | 0.3442 | 1.7321 | 0.59626 | 0       | 0       | 0.19875 | 0.73446    |
| Orotate       | C00295 | NT2   | C13-02     | 5  | 46407.15738  | 15382.61945 | 0           | 0.7668636 | 0.8549 | 1.1148 | 1.68865 | 0.61194 | 0       | 0.76686 | 0.32084    |
| Orotate       | C00295 | I3sg5 | C13-02     | 5  | 0            | 11099.67665 | 0           | 0.1742509 | 0.3018 | 1.7321 | 0       | 0.52275 | 0       | 0.17425 | 0.32084    |
| Orotate       | C00295 | NT2   | C13-03     | 5  | 696150.2551  | 699065.3532 | 363774.6065 | 26.307292 | 1.3203 | 0.0502 | 25.3314 | 27.8096 | 25.7809 | 26.3073 | 0.04773 *  |
| Orotate       | C00295 | I3sg5 | C13-03     | 5  | 309219.351   | 603392.098  | 292299.4522 | 30.789485 | 2.4135 | 0.0784 | 30.7085 | 28.4175 | 33.2424 | 30.7895 | 0.04773 *  |
| Orotate       | C00295 | NT2   | C13-04     | 5  | 0            | 0           | 0           | 0         | 0      | NA     | 0       | 0       | 0       | 0       | NA         |
| Orotate       | C00295 | I3sg5 | C13-04     | 5  | 0            | 0           | 0           | 0         | 0      | NA     | 0       | 0       | 0       | 0       | NA         |
| Orotidine     | X00006 | NT2   | C12 PARENT | 10 | 2120443.295  | 1963117.326 | 1919799.36  | 48.982386 | 0.7307 | 0.0149 | 48.1601 | 49.5573 | 49.2297 | 48.9824 | 0.07079    |
| Orotidine     | X00006 | I3sg5 | C12 PARENT | 10 | 1355207.826  | 1567248.358 | 1090114.497 | 52.062932 | 2.0558 | 0.0395 | 53.3872 | 53.107  | 49.6946 | 52.0629 | 0.07079    |
| Orotidine     | X00006 | NT2   | C13-01     | 10 | 0            | 0           | 0           | 0         | 0      | NA     | 0       | 0       | 0       | 0       | NA         |
| Orotidine     | X00006 | I3sg5 | C13-01     | 10 | 0            | 0           | 0           | 0         | 0      | NA     | 0       | 0       | 0       | 0       | NA         |
| Orotidine     | X00006 | NT2   | C13-04     | 10 | 27470.25015  | 16838.61785 | 21520.82774 | 0.533617  | 0.1007 | 0.1886 | 0.62391 | 0.42508 | 0.55186 | 0.53362 | 0.1599     |
| Orotidine     | X00006 | I3sg5 | C13-04     | 10 | 14503.1557   | 0           | 0           | 0.1904462 | 0.3299 | 1.7321 | 0.57134 | 0       | 0       | 0.19045 | 0.1599     |
| Orotidine     | X00006 | NT2   | C13-05     | 10 | 1641741.934  | 1418280.763 | 1374900.41  | 36.115941 | 1.0509 | 0.0291 | 37.2877 | 35.8033 | 35.2568 | 36.1159 | 0.36193    |
| Orotidine     | X00006 | I3sg5 | C13-05     | 10 | 859008.9007  | 941802.0626 | 819209.9672 | 34.366101 | 2.7537 | 0.0801 | 33.8399 | 31.9135 | 37.345  | 34.3661 | 0.36193    |
| Orotidine     | X00006 | NT2   | C13-06     | 10 | 57727.96304  | 24900.24832 | 47368.49058 | 1.0514659 | 0.3694 | 0.3513 | 1.31113 | 0.62859 | 1.21468 | 1.05147 | 0.18279    |
| Orotidine     | X00006 | I3sg5 | C13-06     | 10 | 0            | 28942.63266 | 10124.4542  | 0.4807585 | 0.4907 | 1.0206 | 0       | 0.98074 | 0.46154 | 0.48076 | 0.18279    |
| Orotidine     | X00006 | NT2   | C13-07     | 10 | 257395.6178  | 265160.61   | 259268.7133 | 6.3960905 | 0.4769 | 0.0746 | 5.84604 | 6.69376 | 6.64847 | 6.39609 | 0.78403    |
| Orotidine     | X00006 | I3sg5 | C13-07     | 10 | 148736.4412  | 190903.6275 | 143708.3992 | 6.2931264 | 0.3779 | 0.0601 | 5.85934 | 6.46887 | 6.55117 | 6.29313 | 0.78403    |
| Orotidine     | X00006 | NT2   | C13-08     | 10 | 298125.698   | 273012.8062 | 276816.7732 | 6.9205181 | 0.1655 | 0.0239 | 6.77111 | 7.09846 | 6.92052 | 6.92052 | 0.55276    |
| Orotidine     | X00006 | I3sg5 | C13-08     | 10 | 160995.1389  | 222215.0362 | 130472.1785 | 6.6066366 | 0.8235 | 0.1247 | 6.34226 | 7.52988 | 5.94778 | 6.60664 | 0.55276    |
| P-Creatine    | C02305 | NT2   | C12 PARENT | 4  | 2384468.35   | 2573297.767 | 3106549.009 | 99.040987 | 0.831  | 0.0084 | 98.5348 | 98.5881 | 100     | 99.041  | 0.56009    |
| P-Creatine    | C02305 | I3sg5 | C12 PARENT | 4  | 2579081.367  | 2493377.794 | 1521268.285 | 99.423596 | 0.6321 | 0.0064 | 99.5232 | 100     | 98.7476 | 99.4236 | 0.56009    |
| P-Creatine    | C02305 | NT2   | C13-01     | 4  | 11573.99242  | 11026.31895 | 0           | 0.3002397 | 0.2615 | 0.871  | 0.47828 | 0.42244 | 0       | 0.30024 | 0.43244    |
| P-Creatine    | C02305 | I3sg5 | C13-01     | 4  | 9933.423924  | 0           | 0           | 0.1727724 | 0.2213 | 1.7321 | 0.38332 | 0       | 0       | 0.17277 | 0.43244    |
| P-Creatine    | C02305 | NT2   | C13-02     | 4  | 23881.56412  | 25826.03419 | 0           | 0.6587729 | 0.5705 | 0.866  | 0.98687 | 0.98945 | 0       | 0.65877 | 0.70697    |
| P-Creatine    | C02305 | I3sg5 | C13-02     | 4  | 2423.04855   | 0           | 19293.88628 | 0.4486316 | 0.6976 | 1.5551 | 0.0935  | 0       | 1.25239 | 0.44863 | 0.70697    |
| PEP           | C00074 | NT2   | C12 PARENT | 3  | 0            | 0           | 13021.08884 | 0.8668154 | 1.5014 | 1.7321 | 0       | 0       | 2.60045 | 0.86682 | 0.15979    |
| PEP           | C00074 | I3sg5 | C12 PARENT | 3  | 42256.11615  | 15642.03556 | 11163.89226 | 4.6262745 | 3.4656 | 0.7491 | 8.6044  | 2.26136 | 3.01307 | 4.62627 | 0.15979    |
| PEP           | C00074 | NT2   | C13-03     | 3  | 562633.6168  | 466720.8494 | 487704.0722 | 99.133185 | 1.5014 | 0.0151 | 100     | 100     | 97.3996 | 99.1332 | 0.15979    |
| PEP           | C00074 | I3sg5 | C13-03     | 3  | 448842.7565  | 676068.515  | 359352.0127 | 95.373725 | 3.4656 | 0.0363 | 91.3956 | 97.7386 | 96.9869 | 95.3737 | 0.15979    |
| Pro           | C00148 | NT2   | C12 PARENT | 5  | 294753519.1  | 245530755.7 | 200559820.2 | 81.608777 | 0.4064 | 0.005  | 81.1747 | 81.6713 | 81.9802 | 81.6088 | 0.05431    |
| Pro           | C00148 | I3sg5 | C12 PARENT | 5  | 126955831.7  | 156060900.2 | 137215015.9 | 84.528164 | 1.8309 | 0.0217 | 86.6423 | 83.4653 | 83.4769 | 84.5282 | 0.05431    |
| Pro           | C00148 | NT2   | C13-01     | 5  | 3976745.138  | 4185429.677 | 2049423.222 | 1.1083712 | 0.2775 | 0.2503 | 1.09519 | 1.39221 | 0.83772 | 1.10837 | 0.33986    |
| Pro           | C00148 | I3sg5 | C13-01     | 5  | 52782.25395  | 2101456.159 | 1564025.377 | 0.7038109 | 0.5847 | 0.8308 | 0.03602 | 1.12391 | 0.9515  | 0.70381 | 0.33986    |
| Pro           | C00148 | NT2   | C13-03     | 5  | 19832716.1   | 15116279.4  | 12694269.62 | 5.2263105 | 0.2193 | 0.042  | 5.4619  | 5.02816 | 5.18887 | 5.22631 | 0.0338 *   |
| Pro           | C00148 | I3sg5 | C13-03     | 5  | 5260970.473  | 8447775.392 | 7349900.009 | 4.191195  | 0.521  | 0.1243 | 3.5904  | 4.51808 | 4.4651  | 4.1912  | 0.0338 *   |
| Pro           | C00148 | NT2   | C13-04     | 5  | 27290174.99  | 22195440.87 | 17773928.75 | 7.3879356 | 0.1253 | 0.017  | 7.51568 | 7.38291 | 7.26522 | 7.38794 | 0.0722     |
| Pro           | C00148 | I3sg5 | C13-04     | 5  | 81144002.395 | 12300551.02 | 11408608.54 | 6.3523353 | 0.7283 | 0.1146 | 5.53776 | 6.57864 | 6.94061 | 6.35234 | 0.0722     |
| Pro           | C00148 | NT2   | C13-05     | 5  | 17256784     | 13604762.82 | 11566685.64 | 4.6686123 | 0.1247 | 0.0267 | 4.7525  | 4.52538 | 4.72796 | 4.66861 | 0.00645 ** |
| Pro           | C00148 | I3sg5 | C13-05     | 5  | 6144710.718  | 8066388.838 | 6847619.189 | 4.2244947 | 0.0788 | 0.0187 | 4.19352 | 4.31411 | 4.16586 | 4.22449 | 0.00645 ** |
| Propanoyl-CoA | C00100 | NT2   | C12 PARENT | 24 | 1453.322549  | 1852.811813 | 3384.146769 | 21.848135 | 1.119  | 0.0512 | 22.75   | 20.5959 | 22.1985 | 21.8481 | 0.4484     |
| Propanoyl-CoA | C00100 | I3sg5 | C12 PARENT | 24 | 3063.239657  | 865.0843734 | 2028.384174 | 24.427858 | 5.203  | 0.213  | 30.4343 | 21.3074 | 21.5419 | 24.4279 | 0.4484     |
| Propanoyl-CoA | C00100 | NT2   | C13-05     | 24 | 4934.914654  | 6636.097745 | 11091.31605 | 74.590411 | 2.3583 | 0.0316 | 77.25   | 73.767  | 72.7542 | 74.5904 | 0.37823    |
| Propanoyl-CoA | C00100 | I3sg5 | C13-05     | 24 | 7001.859489  | 3097.720756 | 6632.69546  | 72.110551 | 3.6606 | 0.0508 | 69.5657 | 76.2982 | 70.4407 | 72.1016 | 0.37823    |
| Propanoyl-CoA | C00100 | NT2   | C13-06     | 24 | 0            | 507.115888  | 769.4489392 | 3.5614538 | 3.0984 | 0.87   | 0       | 5.63711 | 5.04725 | 3.56145 | 0.77209    |
| Propanoyl-CoA | C00100 | I3sg5 | C13-06     | 24 | 0            | 97.21375939 | 754.9139112 | 3.4705915 | 4.1156 | 1.1858 | 0       | 2.39442 | 8.01736 | 3.47059 | 0.97709    |
| R5P           | C00117 | NT2   | C12 PARENT | 5  | 20649.28217  | 18903.57978 | 0           | 2.0654608 | 1.7898 | 0.8665 | 3.0365  | 3.15988 | 0       | 2.06546 | 0.11627    |
| R5P           | C00117 | I3sg5 | C12 PARENT | 5  | 0            | 0           | 0           | 0         | 0      | NA     | 0       | 0       | 0       | 0       | 0.11627    |
| R5P           | C00117 | NT2   | C13-05     | 5  | 659385.8791  | 579333.6178 | 747973.2826 | 97.934539 | 1.7898 | 0.0183 | 96.9635 | 96.8401 | 100     | 97.9345 | 0.11627    |
| R5P           | C00117 | I3sg5 | C13-05     | 5  | 573417.5413  | 529424.1485 | 627469.5018 | 100       | 0      | 0      | 100     | 100     | 100     | 100     | 0.11627    |
| S7P           | C05382 | NT2   | C12 PARENT | 7  | 43525.05266  | 70818.4658  | 96197.7364  | 20.288985 | 2.885  | 0.1422 | 16.9752 | 22.2352 | 21.6593 | 20.289  | 0.20263    |
| S7P           | C05382 | I3sg5 |            |    |              |             |             |           |        |        |         |         |         |         |            |

|              |        |       |            |    |             |             |             |           |        |        |         |         |         |         |            |
|--------------|--------|-------|------------|----|-------------|-------------|-------------|-----------|--------|--------|---------|---------|---------|---------|------------|
| Sorbitol     | C00794 | NT2   | C12 PARENT | 6  | 24815356.36 | 61663364.95 | 32849229.66 | 98.112811 | 0.8681 | 0.0088 | 97.1826 | 98.9014 | 98.2544 | 98.1128 | 0.98154    |
| Sorbitol     | C00794 | I3sg5 | C12 PARENT | 6  | 41200255.31 | 21046537.03 | 24231548.76 | 98.09196  | 1.1824 | 0.0121 | 99.0803 | 96.782  | 98.4136 | 98.092  | 0.98154    |
| Sorbitol     | C00794 | NT2   | C13-01     | 6  | 0           | 0           | 0           | 0         | 0      | NA     | 0       | 0       | 0       | 0       | NA         |
| Sorbitol     | C00794 | I3sg5 | C13-01     | 6  | 0           | 0           | 0           | 0         | 0      | NA     | 0       | 0       | 0       | 0       | NA         |
| Sorbitol     | C00794 | NT2   | C13-06     | 6  | 719416.4797 | 684947.5826 | 583598.9495 | 1.8871894 | 0.8681 | 0.46   | 2.8174  | 1.09858 | 1.74559 | 1.88719 | 0.98154    |
| Sorbitol     | C00794 | I3sg5 | C13-06     | 6  | 382453.8929 | 699799.7259 | 390597.4873 | 1.9080404 | 1.1824 | 0.6197 | 0.91974 | 3.21801 | 1.58637 | 1.90804 | 0.98154    |
| Succ         | C00042 | NT2   | C12 PARENT | 4  | 2591204.804 | 2203844.459 | 3249629.093 | 78.146132 | 0.9458 | 0.0121 | 78.708  | 77.0542 | 78.6762 | 78.1461 | 0.00375 ** |
| Succ         | C00042 | I3sg5 | C12 PARENT | 4  | 2528543.586 | 2654748.873 | 2009667.698 | 82.19056  | 0.6657 | 0.0081 | 82.3998 | 81.4453 | 82.7265 | 82.1906 | 0.00375 ** |
| Succ         | C00042 | NT2   | C13-01     | 4  | 0           | 0           | 0           | 0         | 0      | NA     | 0       | 0       | 0       | 0       | NA         |
| Succ         | C00042 | I3sg5 | C13-01     | 4  | 0           | 0           | 0           | 0         | 0      | NA     | 0       | 0       | 0       | 0       | NA         |
| Succ         | C00042 | NT2   | C13-02     | 4  | 439382.0956 | 291429.4174 | 461058.8362 | 11.566091 | 1.6166 | 0.1398 | 13.3463 | 10.1894 | 11.1626 | 11.5661 | 0.11233    |
| Succ         | C00042 | I3sg5 | C13-02     | 4  | 309429.1888 | 298432.6206 | 231904.277  | 9.5951515 | 0.4659 | 0.0486 | 10.0836 | 9.15565 | 9.54617 | 9.59515 | 0.11233    |
| Succ         | C00042 | NT2   | C13-03     | 4  | 140434.8828 | 224093.6482 | 267474.9302 | 6.1922048 | 1.8015 | 0.2909 | 4.26572 | 7.83511 | 6.47579 | 6.1922  | 0.28057    |
| Succ         | C00042 | I3sg5 | C13-03     | 4  | 146400.4475 | 177926.7524 | 102995.314  | 4.8230798 | 0.6111 | 0.1267 | 4.77088 | 5.45863 | 4.23973 | 4.82308 | 0.28057    |
| Succ         | C00042 | NT2   | C13-04     | 4  | 121154.1285 | 140754.0136 | 152220.8473 | 4.0955716 | 0.7151 | 0.1746 | 3.68006 | 4.92126 | 3.68539 | 4.09557 | 0.26217    |
| Succ         | C00042 | I3sg5 | C13-04     | 4  | 84254.63437 | 128438.8144 | 84722.95772 | 3.2912088 | 0.6032 | 0.1779 | 2.74568 | 3.94039 | 3.48756 | 3.29121 | 0.26217    |
| Succinyl-CoA | C00091 | NT2   | C12 PARENT | 25 | 5720.871171 | 4820.536982 | 5920.928823 | 24.458081 | 2.0245 | 0.0828 | 22.473  | 26.5198 | 24.3814 | 24.4581 | 0.03758 *  |
| Succinyl-CoA | C00091 | I3sg5 | C12 PARENT | 25 | 2624.679324 | 1965.743981 | 1328.438063 | 20.585365 | 0.8365 | 0.0406 | 20.4534 | 19.8227 | 21.48   | 20.5854 | 0.03758 *  |
| Succinyl-CoA | C00091 | NT2   | C13-05     | 25 | 14396.14515 | 10840.43327 | 16700.50184 | 61.653139 | 6.3536 | 0.1031 | 56.5517 | 59.6377 | 68.777  | 61.6531 | 0.33289    |
| Succinyl-CoA | C00091 | I3sg5 | C13-05     | 25 | 8495.102687 | 6714.309775 | 3942.502176 | 65.885101 | 1.9987 | 0.0303 | 66.2    | 67.7076 | 63.7477 | 65.8851 | 0.33289    |
| Succinyl-CoA | C00091 | NT2   | C13-06     | 25 | 4074.586153 | 2516.165276 | 866.1159288 | 11.138333 | 6.646  | 0.5967 | 16.006  | 13.8425 | 3.56653 | 11.1383 | 0.5725     |
| Succinyl-CoA | C00091 | I3sg5 | C13-06     | 25 | 1712.698229 | 1236.569731 | 913.6023348 | 13.529535 | 1.1622 | 0.0859 | 13.3466 | 12.4697 | 14.7724 | 13.5295 | 0.5725     |
| Succinyl-CoA | C00091 | NT2   | C13-07     | 25 | 1265.018348 | 0           | 797.0277289 | 2.7504476 | 2.5269 | 0.9187 | 4.96931 | 0       | 3.28203 | 2.75045 | 0.13248    |
| Succinyl-CoA | C00091 | I3sg5 | C13-07     | 25 | 0           | 0           | 0           | 0         | 0      | NA     | 0       | 0       | 0       | 0       | 0.13248    |
| UDP          | C00015 | NT2   | C12 PARENT | 9  | 1169622.375 | 1125800.059 | 904563.3619 | 13.725836 | 0.3483 | 0.0254 | 13.3854 | 13.7105 | 14.0815 | 13.7258 | 0.08696    |
| UDP          | C00015 | I3sg5 | C12 PARENT | 9  | 727098.0705 | 753870.4435 | 552127.7876 | 14.732332 | 0.6894 | 0.0468 | 14.4875 | 15.5107 | 14.1988 | 14.7323 | 0.08696    |
| UDP          | C00015 | NT2   | C13-01     | 9  | 0           | 0           | 0           | 0         | 0      | NA     | 0       | 0       | 0       | 0       | NA         |
| UDP          | C00015 | I3sg5 | C13-01     | 9  | 0           | 0           | 0           | 0         | 0      | NA     | 0       | 0       | 0       | 0       | NA         |
| UDP          | C00015 | NT2   | C13-02     | 9  | 0           | 0           | 0           | 0         | 0      | NA     | 0       | 0       | 0       | 0       | NA         |
| UDP          | C00015 | I3sg5 | C13-02     | 9  | 0           | 0           | 0           | 0         | 0      | NA     | 0       | 0       | 0       | 0       | NA         |
| UDP          | C00015 | NT2   | C13-03     | 9  | 70796.95061 | 74610.46108 | 29753.33627 | 0.7273454 | 0.234  | 0.3217 | 0.81022 | 0.90864 | 0.46318 | 0.72735 | 0.03955 *  |
| UDP          | C00015 | I3sg5 | C13-03     | 9  | 16249.99213 | 12165.62535 | 13835.77418 | 0.309965  | 0.0541 | 0.1745 | 0.32378 | 0.25031 | 0.35581 | 0.30996 | 0.03955 *  |
| UDP          | C00015 | NT2   | C13-04     | 9  | 166224.2327 | 90733.2518  | 122609.2866 | 1.6386627 | 0.4622 | 0.282  | 1.90231 | 1.10499 | 1.90868 | 1.63866 | 0.14603    |
| UDP          | C00015 | I3sg5 | C13-04     | 9  | 28589.73588 | 47072.3883  | 55180.34355 | 0.9857343 | 0.425  | 0.4311 | 0.56965 | 0.9685  | 1.41905 | 0.98573 | 0.14603    |
| UDP          | C00015 | NT2   | C13-05     | 9  | 4778871.53  | 4590443.958 | 3634238.77  | 55.72339  | 0.9552 | 0.0171 | 54.6905 | 55.9047 | 56.5275 | 55.7234 | 0.60349    |
| UDP          | C00015 | I3sg5 | C13-05     | 9  | 2812854.939 | 2590765.261 | 2178454.151 | 55.124327 | 1.5761 | 0.0286 | 56.0463 | 53.3045 | 56.0253 | 55.1243 | 0.60349    |
| UDP          | C00015 | NT2   | C13-06     | 9  | 642722.6932 | 570209.2744 | 421382.3892 | 6.9531688 | 0.3979 | 0.0572 | 7.35547 | 6.94429 | 6.55975 | 6.95317 | 0.17809    |
| UDP          | C00015 | I3sg5 | C13-06     | 9  | 342913.3592 | 407409.9146 | 331724.2199 | 7.9152439 | 0.9406 | 0.1188 | 6.83256 | 8.38238 | 6.53079 | 7.91524 | 0.17809    |
| UDP          | C00015 | NT2   | C13-07     | 9  | 1170416.215 | 1125163.431 | 867598.8588 | 13.534468 | 0.1561 | 0.0115 | 13.3945 | 13.7028 | 13.5061 | 13.5345 | 0.62185    |
| UDP          | C00015 | I3sg5 | C13-07     | 9  | 698443.1208 | 663433.0198 | 472043.9996 | 13.235279 | 0.9584 | 0.0724 | 13.9165 | 13.65   | 12.1393 | 13.2353 | 0.62185    |
| UDP          | C00015 | NT2   | C13-08     | 9  | 739370.2684 | 634238.3124 | 443611.5084 | 7.6971288 | 0.7782 | 0.1011 | 8.46153 | 7.72406 | 6.90579 | 7.69713 | 0.99998    |
| UDP          | C00015 | I3sg5 | C13-08     | 9  | 392660.5563 | 385598.2257 | 285185.2942 | 6.7971189 | 0.3193 | 0.0415 | 7.82378 | 7.93361 | 7.33397 | 6.79712 | 0.99998    |
| UDP-GlcNac   | C00043 | NT2   | C12 PARENT | 17 | 846607.5769 | 913110.3755 | 1074116.315 | 4.2284197 | 0.4349 | 0.1029 | 4.03827 | 3.92098 | 4.72601 | 4.22842 | 0.03833 *  |
| UDP-GlcNac   | C00043 | I3sg5 | C12 PARENT | 17 | 821801.709  | 853990.3916 | 737076.5427 | 5.2627827 | 0.3972 | 0.0755 | 4.80463 | 5.47456 | 5.50916 | 5.26278 | 0.03833 *  |
| UDP-GlcNac   | C00043 | NT2   | C13-01     | 17 | 0           | 0           | 0           | 0         | 0      | NA     | 0       | 0       | 0       | 0       | NA         |
| UDP-GlcNac   | C00043 | I3sg5 | C13-01     | 17 | 0           | 0           | 0           | 0         | 0      | NA     | 0       | 0       | 0       | 0       | NA         |
| UDP-GlcNac   | C00043 | NT2   | C13-02     | 17 | 212331.3946 | 129026.3191 | 226479.435  | 0.8544307 | 0.2603 | 0.3046 | 1.01281 | 0.55405 | 0.99643 | 0.85443 | 0.33214    |
| UDP-GlcNac   | C00043 | I3sg5 | C13-02     | 17 | 119205.9511 | 94125.11375 | 99928.30065 | 0.6824085 | 0.0728 | 0.1067 | 0.69693 | 0.60339 | 0.7469  | 0.68241 | 0.33214    |
| UDP-GlcNac   | C00043 | NT2   | C13-04     | 17 | 36908.02564 | 27194.27243 | 95953.46184 | 0.2383288 | 0.1619 | 0.6795 | 0.17605 | 0.11677 | 0.42216 | 0.23833 | 0.13048    |
| UDP-GlcNac   | C00043 | I3sg5 | C13-04     | 17 | 116676.0908 | 105268.6291 | 37628.67611 | 0.5460741 | 0.2294 | 0.42   | 0.68214 | 0.67483 | 0.28125 | 0.54607 | 0.13048    |
| UDP-GlcNac   | C00043 | NT2   | C13-05     | 17 | 2016538.721 | 2290385.929 | 2589276.178 | 10.281944 | 0.9673 | 0.0941 | 9.61878 | 9.83512 | 11.3919 | 10.2819 | 0.0197 *   |
| UDP-GlcNac   | C00043 | I3sg5 | C13-05     | 17 | 2298017.659 | 2111245.042 | 1617515.453 | 13.019797 | 0.8069 | 0.062  | 13.4353 | 13.5343 | 12.0899 | 13.0198 | 0.0197 *   |
| UDP-GlcNac   | C00043 | NT2   | C13-06     | 17 | 1273220.319 | 1833316.177 | 1884431.212 | 7.4121562 | 1.1783 | 0.159  | 6.07319 | 8.72424 | 8.29085 | 7.41216 | 0.74008    |
| UDP-GlcNac   | C00043 | I3sg5 | C13-06     | 17 | 1372858.364 | 1205324.582 | 969757.4371 | 7.6671543 | 0.3924 | 0.0512 | 8.02636 | 7.72681 | 7.2483  | 7.66715 | 0.74008    |
| UDP-GlcNac   | C00043 | NT2   | C13-07     | 17 | 888535.2822 | 970082.3179 | 1010710.582 | 4.2835556 | 0.146  | 0.0341 | 4.23827 | 4.16562 | 4.44678 | 4.28356 | 0.00375 ** |
| UDP-GlcNac   | C00043 | I3sg5 | C13-07     | 17 | 1034156.914 | 932302.1721 | 711411.3775 | 5.780022  | 0.4022 | 0.0696 | 6.04615 | 5.97658 | 5.31733 | 5.78002 | 0.00375 ** |
| UDP-GlcNac   | C00043 | NT2   | C13-08     | 17 | 1626275.684 | 2032888.542 | 1575252.313 | 7.8057412 | 0.9004 | 0.1154 | 7.75725 | 8.7294  | 6.93057 | 7.80574 | 0.6588     |
| UDP-GlcNac   | C00043 | I3sg5 | C13-08     | 17 | 1325325.588 | 1162687.384 | 998054.9381 | 7.5539138 | 0.1685 | 0.0223 | 7.74846 | 7.45348 | 7.4598  | 7.55391 | 0.6588     |
| UDP-GlcNac   | C00043 | NT2   | C13-09     | 17 | 248607.2024 | 330199.7756 | 225805.7978 | 1.1907028 | 0.2125 | 0.1772 | 1.18584 | 1.41791 | 0.99347 | 1.19071 | 0.9753     |
| UDP-GlcNac   | C00043 | I3sg5 | C13-09     | 17 | 132043.0086 | 240219.9201 | 175378.9589 | 1.2075902 | 0.3943 | 0.3265 | 0.77198 | 1.53994 | 1.31084 | 1.20759 | 0.9753     |
| UDP-GlcNac   | C00043 | NT2   | C13-10     | 17 | 395305.5886 | 379691.3314 | 325477.935  | 1.6493355 | 0.2274 | 0.1379 | 1.88559 | 1.63043 | 1.43199 | 1.64934 | 0.42612    |
| UDP-GlcNac   | C00043 | I3sg5 | C13-10     | 17 | 260223.6235 | 281434.7025 | 317598.4066 | 1.8997932 | 0.4342 | 0.2286 | 1.52139 | 1.80415 | 2.37384 | 1.89979 | 0.42612    |
| UDP-GlcNac   | C00043 | NT2   | C13-11     | 17 | 4134236.951 | 4796454.034 | 4820790.211 | 20.518012 | 0.7618 | 0.0371 | 19.7201 | 20.5964 | 21.2376 | 20.518  | 0.26993    |
| UDP-GlcNac   | C00043 | I3sg5 | C13-11     | 17 | 3563540.076 | 2945954.63  | 2507943.66  | 19.488178 | 1.1677 | 0.0599 | 20.8341 | 18.8852 | 18.7452 | 19.4882 | 0.26993    |
| UDP-GlcNac   | C00043 | NT2   | C13-12     | 17 | 948436.1617 | 900652.422  | 717348.7478 | 3.8491884 | 0.6841 | 0.1777 | 4.52399 | 3.86748 | 3.15609 | 3.84919 | 0.52056    |
| UDP-GlcNac   | C00043 | I3sg5 | C13-12     | 17 | 497708.8371 | 534360.7017 | 434908.546  | 3.47987   | 0.599  | 0.1721 | 2.90983 | 3.42555 | 4.10422 | 3.47987 | 0.52056    |
| UDP-GlcNac   | C00043 | NT2   | C13-13     | 17 | 4660569.786 | 4943626.198 | 4811264.254 | 21.542319 | 0.5969 | 0.0277 | 22.2307 | 21.2284 | 20.1679 | 21.5423 | 0.02421 *  |
| UDP-GlcNac   | C00043 | I3sg5 | C13-13     | 17 | 3246266.995 | 2988068.235 | 2733312.323 | 19.521355 | 0.7916 | 0.0405 | 18.9792 | 19.1552 | 20.4297 | 19.5214 | 0.02421 *  |
| UDP-GlcNac   | C00043 | NT2   | C13-14     | 17 | 1433532.869 | 1420952.49  | 1367492.492 | 6.3186902 | 0.4516 | 0.0715 | 6.83788 | 6.10169 | 6.0165  | 6.31869 | 0.04209 *  |
| UDP-GlcNac   | C00043 | I3sg5 | C13-14     | 17 | 959030.1384 | 864364.0216 | 733160.6664 |           |        |        |         |         |         |         |            |

|     |        |       |        |   |             |             |             |           |        |        |         |         |         |         |         |
|-----|--------|-------|--------|---|-------------|-------------|-------------|-----------|--------|--------|---------|---------|---------|---------|---------|
| UTP | C00075 | I3sg5 | C13-06 | 9 | 321193.5581 | 326214.9716 | 295009.1287 | 6.8555331 | 1.4344 | 0.2092 | 5.70451 | 6.39954 | 8.46255 | 6.85553 | 0.45242 |
| UTP | C00075 | NT2   | C13-07 | 9 | 1049026.972 | 1036008.149 | 889911.7487 | 12.51445  | 1.0799 | 0.0863 | 12.8818 | 13.3628 | 11.2988 | 12.5144 | 0.47557 |
| UTP | C00075 | I3sg5 | C13-07 | 9 | 772920.4697 | 730726.7989 | 411526.9955 | 13.28912  | 1.3208 | 0.0994 | 13.7273 | 14.3351 | 11.8049 | 13.2891 | 0.47557 |
| UTP | C00075 | NT2   | C13-08 | 9 | 690455.0006 | 517742.0606 | 533301.0718 | 7.3092318 | 1.0138 | 0.1387 | 8.47864 | 6.67801 | 6.77105 | 7.30923 | 0.43044 |
| UTP | C00075 | I3sg5 | C13-08 | 9 | 447462.367  | 388071.153  | 276529.5859 | 7.8308488 | 0.1888 | 0.0241 | 7.94709 | 7.613   | 7.93245 | 7.83085 | 0.43044 |
