# Supplementary material for: Metabolic regulation of RNA methylation by the m6A-reader IGF2BP3
Source: PubMed Central journal article supplement — bioRxiv. 2024 Nov 3:2024.10.31.621399. Preprint. [Version 1] doi: 10.1101/2024.10.31.621399 (PMC11565949; doi:10.1101/2024.10.31.621399), 2024-11-03
Supplement: media-2.pdf [file media-2.pdf]

| <b>NAME</b> | <b>SEQUENCE</b>        |
|-------------|------------------------|
| MAT2A_F     | gaccagggcttaatgttggc   |
| MAT2A_R     | tagaatcagggcgtaaccaagg |
| MAT2B_F     | gagaacaatctaggagctgctg |
| MAT2B_R     | tgccagtgatccatgttgc    |
| MTHFR_F     | atctgtgtggcaggtaccc    |
| MTHFR_R     | aagcggaagaatgtgtcagc   |
| PKM_F       | tgtaccattggcccagcttc   |
| PKM_R       | tgtgcgcacattcttgatgg   |
| PSAT1_F     | tccattccgcattggcaatg   |
| PSAT1_R     | atgcctcccacagacctatg   |
| SHMT1_F     | agtcacaggtggttctgacaac |
| SHMT1_R     | aacaggcttctagcaccttctc |
