# Supplementary material for: Metabolic regulation of RNA methylation by the m6A-reader IGF2BP3
Source: PubMed Central journal article supplement — bioRxiv. 2024 Nov 3:2024.10.31.621399. Preprint. [Version 1] doi: 10.1101/2024.10.31.621399 (PMC11565949; doi:10.1101/2024.10.31.621399), 2024-11-03
Supplement: media-3.pdf [file media-3.pdf]

| Pathway                     | Proteins         | Catalogue number   | Vendor        |
|-----------------------------|------------------|--------------------|---------------|
| Glycolysis                  | PKM2             | 15822-1-AP         | Proteintech   |
| Serine/Glycine Biosynthesis | PHGDH            | PA5-80896          | Thermo Fisher |
|                             | PSAT1            | PA5-121028         | Thermo Fisher |
|                             | SHMT1            | 30192-1-AP         | Proteintech   |
|                             | SHMT2            | 11099-1-AP         | Proteintech   |
| METHYL                      | MTHFS            | PA5-118092         | Thermo Fisher |
|                             | MTHFR            | PA5-140282         | Thermo Fisher |
|                             | MAT2A            | 55309-1-AP         | Proteintech   |
|                             | MAT2B            | 15952-1-AP         | Proteintech   |
| RNA Methylation             | METTL3           | 15073-1-AP         | Proteintech   |
|                             | METTL14          | 26158-1-AP         | Proteintech   |
|                             | METTL16          | 19924-1-AP         | Proteintech   |
|                             | FTO              | 27226-1-AP         | Proteintech   |
|                             | m <sup>6</sup> A | MABE-1006          | Sigma Aldrich |
| Histone Methylation         | Histone H3       | D1H2 mAb 4499      | Thermo Fisher |
|                             | H3K4ME3          | MA511199           | Thermo Fisher |
|                             | H3K4me1          | 710795             | Thermo Fisher |
| Regulatory                  | IGF2BP3          | 14642-1-AP         | Proteintech   |
|                             | ACTIN            | A5441              | Sigma Aldrich |
|                             | VINCULIN         | sc-73614           | Santa Cruz    |
|                             | Puromycin        | MABE343, clone12D1 | Sigma Aldrich |

| <b>Antibody</b>                                                        | <b>Catalogue</b> | <b>Vendor</b>  |
|------------------------------------------------------------------------|------------------|----------------|
| APC anti-mouse CD3ε Antibody                                           | 100311           | Biolegend      |
| APC/Cyanine7 anti-mouse CD117 (c-kit) Antibody                         | 105826           | Biolegend      |
| PE/Cyanine7 anti-mouse/human CD11b Antibody                            | 101215           | Biolegend      |
| PerCP/Cyanine5.5 anti-mouse Ly-6A/E (Sca-1) Antibody                   | 108124           | Biolegend      |
| BD Horizon™ BV786 Mouse Anti-Mouse CD45.2                              | 563686           | BD Biosciences |
| Biotin anti-mouse CD4 Antibody 500 ug                                  | 100404           | Biolegend      |
| Biotin anti-mouse TCR γ/δ Antibody 50 ug                               | 118103           | Biolegend      |
| Biotin anti-mouse/human CD11b Antibody                                 | 101203           | Biolegend      |
| IgM Monoclonal Antibody (II/41), Biotin, eBioscience™, Invitrogen™     | 13-579-082       | Fisher         |
| Biotin anti-human CD45 Antibody                                        | 368534           | Biolegend      |
| PE/Cyanine7 anti-human CD19 Antibody                                   | 302215           | Biolegend      |
| PerCP/Cyanine5.5 anti-human CD34 Antibody                              | 343521           | Biolegend      |
| Biotin anti-mouse/human CD45R/B220 Antibody, 500 ug                    | 103204           | Biolegend      |
| Biotin anti-mouse Ly-6G/Ly-6C (Gr-1) Antibody, 500ug                   | 108404           | Biolegend      |
| Biotin anti-mouse NK-1.1 Antibody, 500 ug                              | 108704           | Biolegend      |
| Biotin anti-mouse TER-119/Erythroid Cells Antibody, 500ug              | 116204           | Biolegend      |
| Biotin anti-mouse TCR β chain Antibody, 500ug                          | 109204           | Biolegend      |
| Biotin anti-mouse CD8a Antibody, 500ug                                 | 100704           | Biolegend      |
| PE/Cyanine7 anti-mouse CD16/32 Antibody, 100ug                         | 101318           | Biolegend      |
| eBioscience™ Streptavidin eFluor™ 450 Conjugate                        | 48-4317-82       | LifeTech       |
| CD34 Monoclonal Antibody (RAM34), Alexa Fluor 700, eBioscience™, 100ug | 56-0341-82       | LifeTech       |
| BD Horizon™ BV605 Mouse Anti-Mouse CD45.2                              | 563051           | BD Biosciences |
